# Supplementary material for: Rhodium(iii)-catalyzed C–H alkylation of arylhydrophthalazinediones with α-Cl ketones as sp3-carbon alkylated agents
Source: Royal Society of Chemistry journal article supplement (doi:10.1039/d3ob00091e), 2023-01-01

## Supporting Information

### Rhodium(III)-catalyzed C–H alkylation of arylhydrophthalazinediones with $\alpha$ -Cl ketones as a $sp^3$ -carbon alkylated agent

He Li, <sup>\*a</sup> Haichun Gu, <sup>a</sup> Ning Xu, <sup>a</sup> Ye Lu, <sup>b</sup> Xinxin Jin, <sup>a</sup> Jiaqi Li, <sup>a</sup> Hongyu Guo, <sup>\*c</sup> Dawei Cao<sup>d</sup> and Jinglin Liu<sup>\*a</sup>

<sup>a</sup>Innovation Team of Optical Functional Molecular Devices, Inner Mongolia Key Laboratory for the Natural Products Chemistry and Functional Molecular Synthesis, College of Chemistry and Materials Science, Inner Mongolia Minzu University, Tongliao 028000, China.

<sup>b</sup>Inner Mongolia Key Laboratory of Carbon Nanomaterials, Nano Innovation Institute (NII), College of Chemistry and Materials Science, Inner Mongolia Minzu University, Tongliao 028000, China.

<sup>c</sup>College of Chemistry and Chemical Engineering, Taiyuan University of Technology, Taiyuan, 030024, China.

<sup>d</sup>Key Laboratory of Comprehensive and Highly Efficient Utilization of Salt Lake Resources, Qinghai Institute of Salt Lakes, Chinese Academy of Sciences, Xining, 810008, China

#### Table of Contents

|                                                                                                                    |      |
|--------------------------------------------------------------------------------------------------------------------|------|
| 1. General Information                                                                                             | S-2  |
| 2. Synthesis of Phthalazinedione                                                                                   | S-2  |
| 3. Characterization Data of Products                                                                               | S-3  |
| 4. Synthesis of ( <i>E</i> )-2-(2-(2-hydrazono-2-phenylethyl)phenyl)-2,3-dihydrophthalazine-1,4-dione ( <b>5</b> ) | S-15 |
| 5. Synthesis of 6-phenylphthalazino[2,3- <i>a</i> ]cinnoline-8,13-dione ( <b>6</b> )                               | S-16 |
| 6. Control Experiments                                                                                             | S-17 |
| 7. References                                                                                                      | S-19 |
| 8. Copies of <sup>1</sup> H and <sup>13</sup> C NMR Spectra of Products                                            | S-20 |

## 1. General Information

All reactions were carried out under air atmosphere unless otherwise noted. An aluminum heating block placed on a stirring plate was used as the heating source. Solvents were purified by standard techniques without special instructions.  $^1\text{H}$  and  $^{13}\text{C}$  NMR spectra were recorded on a Bruker Ascend<sup>TM</sup> 500 M NMR Spectrometer (500 MHz for  $^1\text{H}$ , 125 MHz for  $^{13}\text{C}$ ); DMSO- $d_6$  was used as the solvents. The chemical shifts are reported in ppm down field ( $\delta$ ), the coupling constants  $J$  are given in Hz. The peak patterns are indicated as follows: s, singlet; d, doublet; t, triplet; q, quartet; m, multiplet. IR spectra were recorded on a SHIMADZU IRTracer-100 spectrometer. HRESIMS data were recorded on a Thermo Scientific Q Exactive (Thermo Fisher Scientific) mass spectrometry. TLC was carried out on  $\text{SiO}_2$  (silica gel 60F<sub>254</sub>, Merck), and the spots were located with UV light. Flash chromatography was carried out on  $\text{SiO}_2$  (silica gel 60, 200-300 meth).

The starting materials **1**, **2** were synthesized according the previous literatures.<sup>[1-2]</sup> **2d-2l**, and **2p** are commercially available.

## 2. Synthesis of Phthalazinediones

### 2.1 Optimized Bases of Reaction Conditions

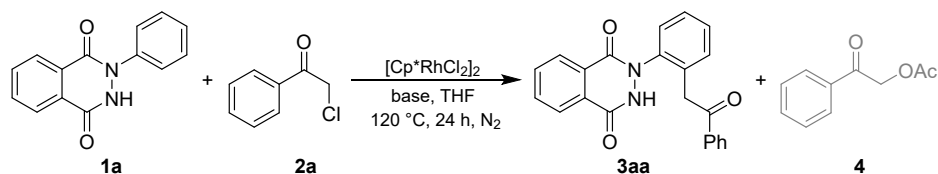

| Entry | Base                     | <b>3aa</b> (%) | <b>4</b> (%) |
|-------|--------------------------|----------------|--------------|
| 1     | $\text{Na}_2\text{CO}_3$ | nd             | 79           |
| 2     | $\text{K}_2\text{CO}_3$  | nd             | 85           |
| 3     | $\text{NaHCO}_3$         | nd             | 71           |
| 4     | $\text{KHCO}_3$          | nd             | 76           |
| 5     | $\text{Na}_3\text{PO}_4$ | nd             | 81           |
| 6     | $\text{K}_3\text{PO}_4$  | nd             | 86           |

|   |                                 |    |    |
|---|---------------------------------|----|----|
| 7 | K <sub>2</sub> HPO <sub>4</sub> | nd | 72 |
| 8 | KH <sub>2</sub> PO <sub>4</sub> | nd | 75 |

<sup>a</sup>Reaction conditions: **1a** (0.2 mmol), **2a** (0.4 mmol), [Cp\*RhCl<sub>2</sub>]<sub>2</sub> (5 mol%) and base (0.3 mmol, 1.5 eq.) in THF (1.0 mL) at 120 °C under N<sub>2</sub> for 24 h. Isolated yields. nd = not detected.

## 2.2 General Procedure for the Rh(III)-Catalyzed C–H Alkylation Reaction

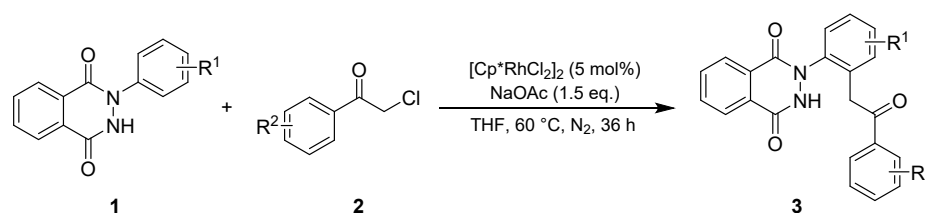

A reaction flask was charged with a mixture of *N*-aryl phthalazinone (**1**) (0.2 mmol), α-Cl ketones (**2**) (0.4 mmol, 2.0 equiv.), [Cp\*RhCl<sub>2</sub>]<sub>2</sub> (6.2 mg, 0.01 mmol, 5 mol%), NaOAc (24.6 mg, 0.3 mmol, 1.5 equiv.), and THF (1.0 mL). The reaction mixture was stirred at 60 °C under N<sub>2</sub> atmosphere for 36 h. After the reaction mixture was cooled to room temperature, the solvent was removed under reduced pressure, and the residue was purified via silica gel chromatography (eluent: dichloromethane/ethyl acetate to petroleum ether/ethyl acetate) to give product **3**.

## 3. Characterization Data of Products

### 2-(2-(2-oxo-2-phenylethyl)phenyl)-2,3-dihydrophthalazine-1,4-dione (**3aa**)<sup>[3]</sup>

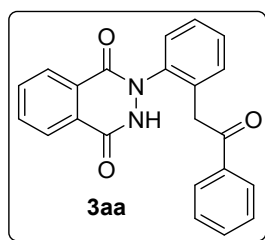

White solid (68.4 mg, 96% yield). Eluents for column chromatography: dichloromethane/ethyl acetate (24:1 v/v) to petroleum ether/ethyl acetate (10:1 v/v). <sup>1</sup>H NMR (DMSO-*d*<sub>6</sub>, 500 MHz) δ 11.78 (s, 1H), 8.17 (d, *J* = 5.0 Hz, 1H), 7.91-7.90 (m, 2H), 7.87-7.83 (m, 1H), 7.73 (d, *J* = 10.0 Hz, 2H), 7.45-7.41 (m, 5H), 7.31-7.28 (m, 2H), 4.28 (s, 2H); <sup>13</sup>C NMR (DMSO-*d*<sub>6</sub>, 125 MHz) δ 197.0, 157.5, 136.6, 133.6, 133.1, 132.5, 131.6, 129.1, 128.6, 128.5, 128.1, 127.8, 126.8, 124.3, 41.2.

### 2-(5-methyl-2-(2-oxo-2-phenylethyl)phenyl)-2,3-dihydrophthalazine-1,4-dione (**3ba**)

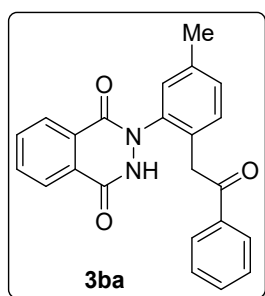

White solid (39.8 mg, 54% yield). Eluents for column chromatography: dichloromethane/ethyl acetate (45:1 v/v) to petroleum ether/ethyl acetate (10:1 v/v).  $^1\text{H}$  NMR (DMSO- $d_6$ , 500 MHz)  $\delta$  11.79 (s, 1H), 8.19 (d,  $J = 10.0$  Hz, 1H), 7.94-7.88 (m, 2H), 7.86-7.83 (m, 1H), 7.74 (d,  $J = 10.0$  Hz, 2H), 7.44-7.41 (m, 1H), 7.32-7.27 (m, 3H), 7.23-7.21 (m, 2H), 4.24 (s, 2H), 2.32 (s, 3H);  $^{13}\text{C}$  NMR (DMSO- $d_6$ , 125 MHz)  $\delta$  197.2, 157.4, 137.2, 136.6, 133.5, 133.0, 132.5, 131.3, 130.4, 129.2, 129.1, 128.9, 128.5, 128.2, 126.8, 124.3, 40.9, 20.6; IR (KBr): 3126, 3067, 1676, 1639, 1559, 1503, 1324, 1254, 1092, 692 ( $\text{cm}^{-1}$ ); HRMS (ESI)  $m/z$  calcd for  $\text{C}_{23}\text{H}_{18}\text{N}_2\text{O}_3\text{Na}$   $[\text{M}+\text{Na}]^+$ : 393.1210; found: 393.1193.

**2-(4-methyl-2-(2-oxo-2-phenylethyl)phenyl)-2,3-dihydrophthalazine-1,4-dione (3ca)**<sup>[3]</sup>

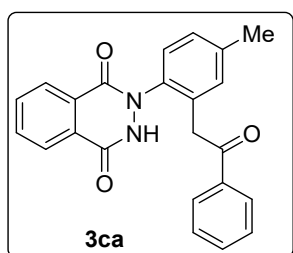

White solid (48.5 mg, 66% yield). Eluents for column chromatography: dichloromethane/ethyl acetate (24:1 v/v) to petroleum ether/ethyl acetate (10:1 v/v).  $^1\text{H}$  NMR (DMSO- $d_6$ , 500 MHz)  $\delta$  11.76 (s, 1H), 8.16 (d,  $J = 5.0$  Hz, 1H), 7.90-7.88 (m, 2H), 7.87-7.81 (m, 1H), 7.73-7.71 (m, 2H), 7.43-7.41 (m, 1H), 7.30-7.27 (m, 3H), 7.22-7.18 (m, 2H), 4.22 (s, 2H), 2.35 (s, 3H);  $^{13}\text{C}$  NMR (DMSO- $d_6$ , 125 MHz)  $\delta$  197.1, 157.5, 150.6, 137.7, 136.6, 133.5, 133.2, 133.0, 132.4, 131.9, 129.1, 129.0, 128.5, 128.3, 128.3, 128.1, 126.8, 125.9, 124.3, 41.1, 20.9.

**2-(4-isopropyl-2-(2-oxo-2-phenylethyl)phenyl)-2,3-dihydrophthalazine-1,4-dione (3da)**

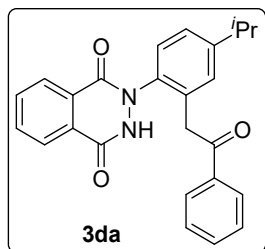

White solid (56.3 mg, 71% yield). Eluents for column chromatography: dichloromethane/ethyl acetate (45:1 v/v) to petroleum ether/ethyl acetate (10:1 v/v).  $^1\text{H}$  NMR (DMSO- $d_6$ , 500 MHz)  $\delta$  11.74 (s, 1H), 8.16 (d,  $J = 5.0$  Hz, 1H), 7.90-7.86 (m, 2H), 7.84-7.81 (m, 1H), 7.72-7.71 (m, 2H), 7.42-7.39 (m, 1H), 7.31-7.24 (m, 5H), 4.26 (s, 2H), 3.00-2.88 (m, 1H), 1.23 (d,  $J = 5.0$  Hz, 6H);  $^{13}\text{C}$  NMR (DMSO- $d_6$ , 125 MHz)  $\delta$  197.1, 157.5, 148.6, 136.7, 133.5, 133.3, 133.0, 132.4, 129.6, 129.2,

128.5, 128.4, 128.1, 126.8, 125.5, 124.3, 41.3, 33.4, 24.1; IR (KBr): 3064, 2958, 1680, 1643, 1588, 1500, 1327, 1269, 1210, 688 (cm<sup>-1</sup>); HRMS (ESI) m/z calcd for C<sub>25</sub>H<sub>22</sub>N<sub>2</sub>O<sub>3</sub>Na [M+Na]<sup>+</sup>: 421.1523; found: 421.1508.

### 2-(4-butyl-2-(2-oxo-2-phenylethyl)phenyl)-2,3-dihydrophthalazine-1,4-dione (3ea)

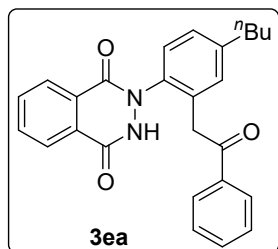

White solid (64.2 mg, 78% yield). Eluents for column chromatography: dichloromethane/ethyl acetate (24:1 v/v) to petroleum ether/ethyl acetate (10:1 v/v). <sup>1</sup>H NMR (DMSO-*d*<sub>6</sub>, 500 MHz) δ 11.76 (s, 1H), 8.17 (d, *J* = 5.0 Hz, 1H), 7.92-7.86 (m, 2H), 7.85-7.82 (m, 1H), 7.72 (d, *J* = 10.0 Hz, 2H), 7.43-7.40 (m, 1H), 7.29-7.26 (m, 3H), 7.23 (s, 1H), 7.20 (d, *J* = 5.0 Hz, 1H), 4.24 (s, 2H), 2.62 (t, *J* = 5.0 Hz, 2H), 1.59-1.53 (m, 2H), 1.32-1.24 (m, 2H), 0.89 (t, *J* = 10.0 Hz, 3H); <sup>13</sup>C NMR (DMSO-*d*<sub>6</sub>, 125 MHz) δ 197.1, 157.5, 142.5, 136.6, 133.5, 133.2, 133.0, 132.4, 131.4, 129.2, 128.5, 128.4, 128.3, 128.1, 127.6, 126.8, 125.9, 124.3, 41.3, 34.6, 33.2, 21.8, 14.0; IR (KBr): 3134, 2961, 2928, 1683, 1639, 1573, 1364, 1324, 1254, 692 (cm<sup>-1</sup>); HRMS (ESI) m/z calcd for C<sub>26</sub>H<sub>24</sub>N<sub>2</sub>O<sub>3</sub>Na [M+Na]<sup>+</sup>: 435.1679; found: 435.1665.

### 2-(4-(tert-butyl)-2-(2-oxo-2-phenylethyl)phenyl)-2,3-dihydrophthalazine-1,4-dione (3fa)

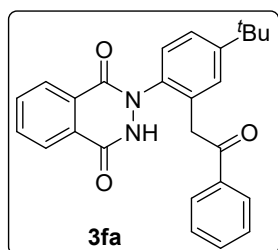

White solid (63.8 mg, 77% yield). Eluents for column chromatography: dichloromethane/ethyl acetate (24:1 v/v) to petroleum ether/ethyl acetate (10:1 v/v). <sup>1</sup>H NMR (DMSO-*d*<sub>6</sub>, 500 MHz) δ 11.69 (s, 1H), 8.16 (d, *J* = 10.0 Hz, 1H), 7.93-7.89 (m, 2H), 7.86-7.82 (m, 1H), 7.73 (d, *J* = 5.0 Hz, 2H), 7.47-7.40 (m, 3H), 7.31-7.27 (m, 3H), 4.29 (s, 2H), 1.32 (s, 9H); <sup>13</sup>C NMR (DMSO-*d*<sub>6</sub>, 125 MHz) δ 197.1, 136.7, 133.4, 133.0, 132.4, 129.1, 128.6, 128.5, 128.1, 128.0, 126.8, 124.5, 41.5, 34.6, 31.3; IR (KBr): 3310, 2958, 1676, 1654, 1592, 1500, 1349, 1254, 1221, 692 (cm<sup>-1</sup>); HRMS (ESI) m/z calcd for C<sub>26</sub>H<sub>24</sub>N<sub>2</sub>O<sub>3</sub>Na [M+Na]<sup>+</sup>: 435.1679; found: 435.1667.

### 2-(4-fluoro-2-(2-oxo-2-phenylethyl)phenyl)-2,3-dihydrophthalazine-1,4-dione (3ga)<sup>[3]</sup>

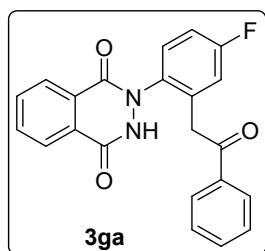

White solid (54.0 mg, 72% yield). Eluents for column chromatography: dichloromethane/ethyl acetate (45:1 v/v) to petroleum ether/ethyl acetate (10:1 v/v).  $^1\text{H}$  NMR (DMSO- $d_6$ , 500 MHz)  $\delta$  11.80 (s, 1H), 8.15 (d,  $J = 10.0$  Hz, 1H), 7.92-7.89 (m, 2H), 7.86-7.83 (m, 1H), 7.75 (d,  $J = 5.0$  Hz, 2H), 7.49-7.44 (m, 2H), 7.35-7.24 (m, 4H), 4.32 (s, 2H);  $^{13}\text{C}$  NMR (DMSO- $d_6$ , 125 MHz)  $\delta$  196.3, 161.0 (d,  $^1J_{\text{C-F}} = 243.8$  Hz), 157.6, 150.7, 136.5, 136.2 (d,  $^3J_{\text{C-F}} = 8.8$  Hz), 133.6, 133.2, 132.5, 130.5 (d,  $^3J_{\text{C-F}} = 7.5$  Hz), 129.0, 128.6, 128.1, 126.8, 124.3 (d,  $^4J_{\text{C-F}} = 2.5$  Hz), 118.3 (d,  $^2J_{\text{C-F}} = 22.5$  Hz), 114.5 (d,  $^2J_{\text{C-F}} = 22.5$  Hz), 40.9.

**2-(3-chloro-2-(2-oxo-2-phenylethyl)phenyl)-2,3-dihydrophthalazine-1,4-dione (3ha)**

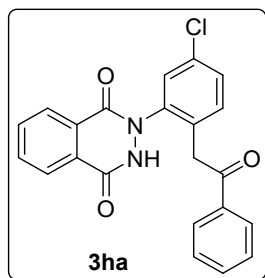

White solid (67.6 mg, 86% yield). Eluents for column chromatography: dichloromethane/ethyl acetate (45:1 v/v) to petroleum ether/ethyl acetate (10:1 v/v).  $^1\text{H}$  NMR (DMSO- $d_6$ , 500 MHz)  $\delta$  11.82 (s, 1H), 8.16 (d,  $J = 10.0$  Hz, 1H), 7.91-7.82 (m, 3H), 7.74 (d,  $J = 5.0$  Hz, 2H), 7.57 (s, 1H), 7.51-7.43 (m, 3H), 7.32-7.29 (m, 2H), 4.33 (s, 2H);  $^{13}\text{C}$  NMR (DMSO- $d_6$ , 125 MHz)  $\delta$  196.6, 157.6, 150.9, 142.2, 136.5, 133.7, 133.4, 133.2, 132.7, 132.5, 131.6, 129.0, 128.6, 128.6, 128.3, 128.1, 126.8, 125.0, 124.4, 40.7; IR (KBr): 3064, 2961, 1694, 1588, 1489, 1320, 1276, 993, 784, 692 ( $\text{cm}^{-1}$ ); HRMS (ESI)  $m/z$  calcd for  $\text{C}_{22}\text{H}_{14}\text{ClN}_2\text{O}_3^-$  [ $\text{M-H}^-$ ]: 389.0698; found: 389.0699.

**2-(4-chloro-2-(2-oxo-2-phenylethyl)phenyl)-2,3-dihydrophthalazine-1,4-dione (3ia)<sup>[3]</sup>**

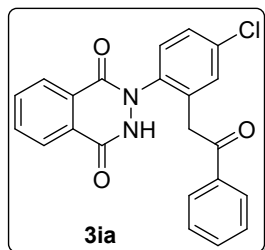

White solid (54.9 mg, 70% yield). Eluents for column chromatography: dichloromethane/ethyl acetate (45:1 v/v) to petroleum ether/ethyl acetate (10:1 v/v).  $^1\text{H}$  NMR (DMSO- $d_6$ , 500 MHz)  $\delta$  8.14 (d,  $J = 5.0$  Hz, 1H), 7.91-7.89 (m, 2H), 7.86-7.82 (m, 1H), 7.74 (d,  $J = 5.0$  Hz, 2H), 7.56 (s, 1H), 7.49-7.44 (m, 3H), 7.32-7.29 (m, 2H), 4.33 (s, 2H);  $^{13}\text{C}$  NMR (DMSO- $d_6$ , 125 MHz)  $\delta$  196.3, 136.5, 133.6, 133.2, 132.5, 131.5, 130.3, 128.9, 128.6, 128.0, 127.7, 126.8, 40.7.

**2-(4-bromo-2-(2-oxo-2-phenylethyl)phenyl)-2,3-dihydrophthalazine-1,4-dione (3ja)<sup>[3]</sup>**

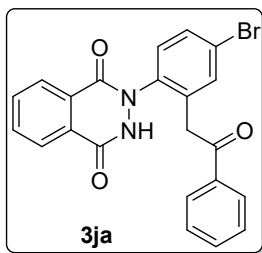

White solid (83.1 mg, 95% yield). Eluents for column chromatography: dichloromethane/ethyl acetate (24:1 v/v) to petroleum ether/ethyl acetate (10:1 v/v).  $^1\text{H}$  NMR (DMSO- $d_6$ , 500 MHz)  $\delta$  11.84 (s, 1H), 8.14 (d,  $J = 10.0$  Hz, 1H), 7.88-7.82 (m, 3H), 7.74-7.70 (m, 3H), 7.61 (d,  $J = 5.0$  Hz, 1H), 7.45-7.40 (m, 2H), 7.31-7.28 (m, 2H), 4.35 (s, 2H);  $^{13}\text{C}$  NMR (DMSO- $d_6$ , 125 MHz)  $\delta$  196.7, 157.8, 151.1, 140.8, 136.8, 136.5, 134.8, 133.9, 133.5, 132.8, 130.9, 129.3, 128.9, 128.3, 127.1, 125.2, 124.6, 121.3, 41.0.

**2-(2-(2-oxo-2-phenylethyl)-4-(trifluoromethyl)phenyl)-2,3-dihydrophthalazine-1,4-dione (3ka)**

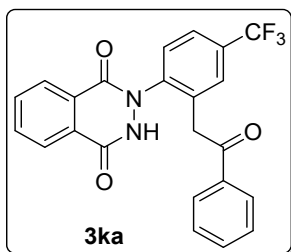

White solid (77.8 mg, 92% yield). Eluents for column chromatography: dichloromethane/ethyl acetate (45:1 v/v) to petroleum ether/ethyl acetate (10:1 v/v).  $^1\text{H}$  NMR (DMSO- $d_6$ , 500 MHz)  $\delta$  11.93 (s, 1H), 8.14 (d,  $J = 5.0$  Hz, 1H), 7.97-7.94 (m, 1H), 7.90-7.89 (m, 3H), 7.86-7.82 (m, 1H), 7.80-7.78 (m, 1H), 7.75-7.74 (m, 1H), 7.69-7.68 (m, 1H), 7.51-7.43 (m, 1H), 7.32-7.29 (m, 2H), 4.47 (s, 2H);  $^{13}\text{C}$  NMR (DMSO- $d_6$ , 125 MHz)  $\delta$  196.3, 167.6, 157.5, 151.0, 144.5, 136.5, 135.0, 133.8, 133.2, 133.1, 132.6, 129.6, 129.5, 129.1 (d,  $^4J_{\text{C-F}} = 3.8$  Hz), 128.9, 128.8, 128.6, 128.0, 126.8, 124.7 (d,  $^4J_{\text{C-F}} = 3.8$  Hz), 124.4, 123.2, 40.9; IR (KBr): 3189, 1661, 1592, 1423, 1334, 1294, 1155, 1118, 920, 688 ( $\text{cm}^{-1}$ ); HRMS (ESI)  $m/z$  calcd for  $\text{C}_{23}\text{H}_{15}\text{F}_3\text{N}_2\text{O}_3\text{Na}$   $[\text{M}+\text{Na}]^+$ : 447.0927; found: 447.0916.

**2-(2-(2-oxo-2-phenylethyl)-4-(trifluoromethoxy)phenyl)-2,3-dihydrophthalazine-1,4-dione (3la)**

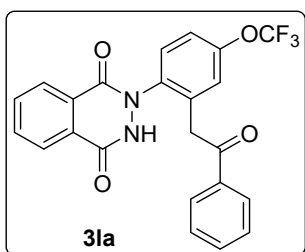

White solid (77.1 mg, 88% yield). Eluents for column chromatography: dichloromethane/ethyl acetate (45:1 v/v) to petroleum ether/ethyl acetate (10:1 v/v).  $^1\text{H}$  NMR (DMSO- $d_6$ , 500 MHz)  $\delta$  11.83 (s, 1H), 8.15 (d,  $J = 10.0$  Hz, 1H), 7.90-7.82 (m, 3H), 7.75 (d,  $J = 10.0$  Hz, 2H), 7.59 (d,  $J = 5.0$  Hz, 1H), 7.53 (s, 1H), 7.47-7.42 (m, 2H), 7.32-7.29 (m, 2H), 4.40 (s, 2H);  $^{13}\text{C}$  NMR (125 MHz,

DMSO-*d*<sub>6</sub>)  $\delta$  196.3, 157.7, 151.0, 147.6, 140.2, 136.5, 136.2, 133.7, 133.3, 132.6, 130.5, 129.5, 129.0, 128.8, 128.6, 128.1, 126.8, 125.0, 124.4 (d,  $^3J_{C-F}$  = 3.8 Hz), 121.4, 120.3, 119.3, 40.9; IR (KBr): 3200, 2954, 2924, 1658, 1595, 1496, 1283, 1199, 1155, 688 (cm<sup>-1</sup>); HRMS (ESI) *m/z* calcd for C<sub>23</sub>H<sub>15</sub>F<sub>3</sub>N<sub>2</sub>O<sub>4</sub>Na [M+Na]<sup>+</sup>: 463.0876; found: 463.0864.

**4-(1,4-dioxo-3,4-dihydrophthalazin-2(1H)-yl)-3-(2-oxo-2-phenylethyl)benzonitrile (3ma)**

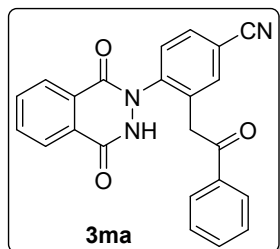

White solid (55.3 mg, 73% yield). Eluents for column chromatography: dichloromethane/ethyl acetate (24:1 v/v) to petroleum ether/ethyl acetate (10:1 v/v). <sup>1</sup>H NMR (DMSO-*d*<sub>6</sub>, 500 MHz)  $\delta$  11.91 (s, 1H), 8.13 (d,  $J$  = 10.0 Hz, 1H), 7.99 (s, 1H), 7.92-7.89 (m, 3H), 7.85-7.81 (m, 1H), 7.76 (d,  $J$  = 5.0 Hz, 2H), 7.69 (d,  $J$  = 5.0 Hz, 1H), 7.47-7.44 (m, 1H), 7.33-7.30 (m, 2H), 4.44 (s, 2H); <sup>13</sup>C NMR (DMSO-*d*<sub>6</sub>, 125 MHz)  $\delta$  196.1, 157.5, 151.1, 145.2, 136.4, 136.1, 135.3, 133.8, 133.3, 132.6, 131.7, 129.9, 128.9, 128.6, 128.0, 126.8, 124.9, 124.4, 118.6, 110.9, 40.8; IR (KBr): 3064, 2234, 1691, 1588, 1551, 1493, 1364, 1338, 1217, 688 (cm<sup>-1</sup>); HRMS (ESI) *m/z* calcd for C<sub>23</sub>H<sub>15</sub>N<sub>3</sub>O<sub>3</sub>Na [M+Na]<sup>+</sup>: 404.1006; found: 404.0992.

**2-(3,4-dimethyl-2-(2-oxo-2-phenylethyl)phenyl)-2,3-dihydrophthalazine-1,4-dione (3na)<sup>[3]</sup>**

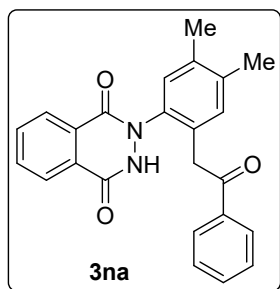

White solid (36.8 mg, 48% yield). Eluents for column chromatography: dichloromethane/ethyl acetate (45:1 v/v) to petroleum ether/ethyl acetate (10:1 v/v). <sup>1</sup>H NMR (DMSO-*d*<sub>6</sub>, 500 MHz)  $\delta$  11.71 (s, 1H), 8.16 (d,  $J$  = 10.0 Hz, 1H), 7.91-7.90 (m, 2H), 7.86-7.83 (m, 1H), 7.73 (d,  $J$  = 5.0 Hz, 2H), 7.45-7.42 (m, 1H), 7.31-7.28 (m, 2H), 7.17 (s, 2H), 4.18 (s, 2H), 2.26 (s, 3H), 2.23 (s, 3H); <sup>13</sup>C NMR (DMSO-*d*<sub>6</sub>, 125 MHz)  $\delta$  197.2, 157.5, 136.6, 136.4, 135.7, 133.4, 133.0, 132.4, 132.2, 130.4, 129.5, 129.2, 129.2, 128.8, 128.5, 128.1, 126.8, 124.3, 40.8, 19.3, 19.0.

**2-(3-chloro-4-methyl-2-(2-oxo-2-phenylethyl)phenyl)-2,3-dihydrophthalazine-1,4-dione (3oa)<sup>[3]</sup>**



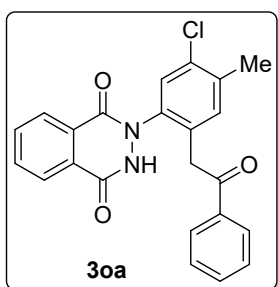

White solid (73.1 mg, 90% yield). Eluents for column chromatography: dichloromethane/ethyl acetate (45:1 v/v) to petroleum ether/ethyl acetate (10:1 v/v).  $^1\text{H}$  NMR (DMSO- $d_6$ , 500 MHz)  $\delta$  11.80 (s, 1H), 8.14 (d,  $J = 5.0$  Hz, 1H), 7.89-7.88 (m, 2H), 7.85-7.81 (m, 1H), 7.73-7.72 (m, 2H), 7.52-7.48 (m, 1H), 7.45-7.42 (m, 2H), 7.31-7.28 (m, 2H), 4.26 (s, 2H), 2.38 (s, 3H);  $^{13}\text{C}$  NMR (DMSO- $d_6$ , 125 MHz)  $\delta$  196.7, 167.5, 157.5, 150.7, 139.8, 136.5, 135.5, 134.0, 133.6, 133.2, 133.1, 132.5, 131.6, 129.5, 129.0, 128.8, 128.7, 128.6, 128.1, 126.8, 124.4, 40.6, 19.5.

### 2-(3,4-difluoro-2-(2-oxo-2-phenylethyl)phenyl)-2,3-dihydrophthalazine-1,4-dione (3pa)

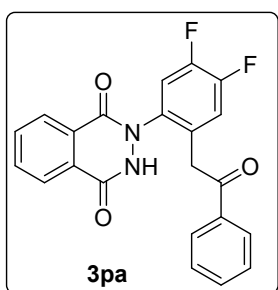

White solid (46.5 mg, 62% yield). Eluents for column chromatography: dichloromethane/ethyl acetate (45:1 v/v) to petroleum ether/ethyl acetate (10:1 v/v).  $^1\text{H}$  NMR (DMSO- $d_6$ , 500 MHz)  $\delta$  11.86 (s, 1H), 8.13 (d,  $J = 10.0$  Hz, 1H), 7.91 (d,  $J = 5.0$  Hz, 2H), 7.86-7.82 (m, 3H), 7.56-7.49 (m, 2H), 7.38-7.35 (m, 3H), 4.39 (s, 2H);  $^{13}\text{C}$  NMR (DMSO- $d_6$ , 125 MHz)  $\delta$  194.8, 157.8, 136.3, 133.8, 133.4, 132.6, 129.0, 128.7, 128.2, 126.8, 125.1, 124.4, 116.1 (d,  $^3J_{\text{C-F}} = 16.3$  Hz), 35.4; IR (KBr): 3064, 1665, 1595, 1500, 1298, 1225, 1092, 1019, 813, 688 ( $\text{cm}^{-1}$ ); HRMS (ESI)  $m/z$  calcd for  $\text{C}_{22}\text{H}_{14}\text{F}_2\text{N}_2\text{O}_3\text{Na}$  [ $\text{M}+\text{Na}$ ] $^+$ : 415.0865; found: 415.0851.

### 2-(3-(2-oxo-2-phenylethyl)naphthalen-2-yl)-2,3-dihydrophthalazine-1,4-dione (3qa)

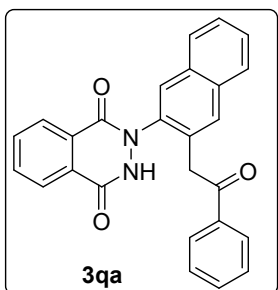

White solid (57.2 mg, 70% yield). Eluents for column chromatography: dichloromethane/ethyl acetate (45:1 v/v) to petroleum ether/ethyl acetate (10:1 v/v).  $^1\text{H}$  NMR (DMSO- $d_6$ , 500 MHz)  $\delta$  11.82 (s, 1H), 8.19 (d,  $J = 5.0$  Hz, 1H), 8.03-7.85 (m, 7H), 7.75 (d,  $J = 10.0$  Hz, 2H), 7.60-7.54 (m, 2H), 7.42-7.39 (m, 1H), 7.29-7.26 (m, 2H), 4.46 (s, 2H);  $^{13}\text{C}$  NMR (DMSO- $d_6$ , 125 MHz)  $\delta$  197.4, 136.9, 133.9, 133.3, 132.9, 132.8, 132.6, 132.3, 130.6, 129.4, 128.8, 128.4, 128.1, 127.7, 127.6,

127.4, 127.0, 126.8, 41.7; IR (KBr): 3123, 1665, 1592, 1503, 1298, 1265, 1195, 1092, 898, 688 (cm<sup>-1</sup>); HRMS (ESI) m/z calcd for C<sub>26</sub>H<sub>18</sub>N<sub>2</sub>O<sub>3</sub>Na [M+Na]<sup>+</sup>: 429.1210; found: 429.1198.

**1-(2-(2-oxo-2-phenylethyl)phenyl)-1,2-dihydropyridazine-3,6-dione (3ra)**

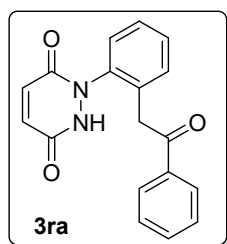

White solid (40.6 mg, 66% yield). Eluents for column chromatography: dichloromethane/ethyl acetate (45:1 v/v) to petroleum ether/ethyl acetate (10:1 v/v). <sup>1</sup>H NMR (DMSO-*d*<sub>6</sub>, 500 MHz) δ 11.27 (s, 1H), 7.83 (d, *J* = 10.0 Hz, 2H), 7.58 (s, 1H), 7.47-7.32 (m, 6H), 7.04-7.02 (m, 1H), 6.88-6.86 (m, 1H), 4.25 (s, 2H); <sup>13</sup>C NMR (DMSO-*d*<sub>6</sub>, 125 MHz) δ 197.0, 158.1, 153.2, 141.2, 136.9, 133.9, 133.6, 133.2, 131.9, 129.1, 128.9, 128.5, 128.4, 128.2, 128.0, 41.5; IR (KBr): 3075, 2924, 2598, 1680, 1588, 1515, 1269, 839, 754, 688 (cm<sup>-1</sup>); HRMS (ESI) m/z calcd for C<sub>18</sub>H<sub>14</sub>N<sub>2</sub>O<sub>3</sub>Na [M+Na]<sup>+</sup>: 329.0897; found: 329.0889.

**2-(2-(2-oxo-2-(*p*-tolyl)ethyl)phenyl)-2,3-dihydrophthalazine-1,4-dione (3ab)<sup>[3]</sup>**

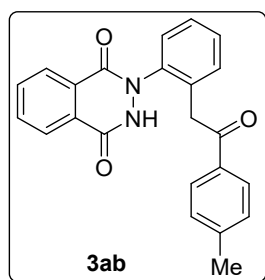

White solid (56.9 mg, 77% yield). Eluents for column chromatography: dichloromethane/ethyl acetate (24:1 v/v) to petroleum ether/ethyl acetate (10:1 v/v). <sup>1</sup>H NMR (DMSO-*d*<sub>6</sub>, 500 MHz) δ 11.78 (s, 1H), 8.15 (d, *J* = 10.0 Hz, 1H), 7.89-7.87 (m, 2H), 7.85-7.82 (m, 1H), 7.60 (d, *J* = 10.0 Hz, 2H), 7.44-7.39 (m, 4H), 7.04 (d, *J* = 10.0 Hz, 2H), 4.24 (s, 2H), 2.20 (s, 3H); <sup>13</sup>C NMR (DMSO-*d*<sub>6</sub>, 125 MHz) δ 196.6, 157.5, 150.6, 143.4, 141.0, 134.2, 133.9, 133.4, 132.4, 131.6, 129.1, 129.0, 128.6, 128.5, 128.2, 127.7, 126.8, 126.2, 124.9, 41.0, 21.2.

**2-(2-(2-oxo-2-(*m*-tolyl)ethyl)phenyl)-2,3-dihydrophthalazine-1,4-dione (3ac)<sup>[3]</sup>**

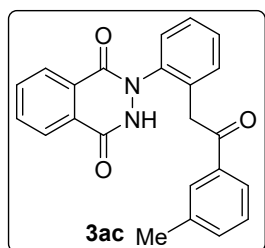

White solid (59.0 mg, 80% yield). Eluents for column chromatography: dichloromethane/ethyl acetate (45:1 v/v) to petroleum ether/ethyl acetate (10:1 v/v). <sup>1</sup>H NMR (DMSO-*d*<sub>6</sub>, 500 MHz) δ 11.79 (s, 1H), 8.18 (d, *J* = 10.0 Hz, 1H), 7.91-7.85 (m, 3H), 7.54-7.42 (m, 6H), 7.22-7.5 (m, 2H), 4.27 (s, 2H), 2.18 (s, 3H); <sup>13</sup>C NMR (DMSO-*d*<sub>6</sub>, 125 MHz) δ 197.3, 157.5, 141.0, 137.9, 136.7,

133.9, 133.6, 133.5, 132.4, 131.7, 129.1, 128.7, 128.6, 128.5, 128.5, 128.4, 127.8, 126.8, 126.2, 125.4, 124.3, 41.1, 21.0.

**2-(2-(2-(4-methoxyphenyl)-2-oxoethyl)phenyl)-2,3-dihydrophthalazine-1,4-dione (3ad)<sup>[3]</sup>**

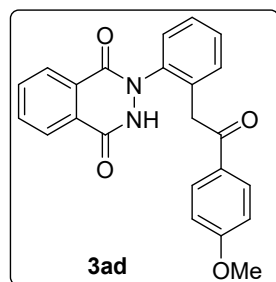

White solid (45.1 mg, 58% yield). Eluents for column chromatography: dichloromethane/ethyl acetate (45:1 v/v) to petroleum ether/ethyl acetate (10:1 v/v). <sup>1</sup>H NMR (DMSO-*d*<sub>6</sub>, 500 MHz)  $\delta$  11.78 (s, 1H), 8.17 (d, *J* = 10.0 Hz, 1H), 7.89-7.83 (m, 3H), 7.70 (d, *J* = 10.0 Hz, 2H), 7.43-7.39 (m, 4H), 6.76-6.74 (m, 2H), 4.21 (s, 2H), 3.71 (s, 3H); <sup>13</sup>C NMR (DMSO-*d*<sub>6</sub>, 125 MHz)  $\delta$  195.4, 163.0, 133.4, 132.4, 131.5, 130.4, 129.5, 129.1, 128.6, 127.7, 126.8, 126.2, 113.6, 55.5, 40.7.

**2-(2-(2-(4-(tert-butyl)phenyl)-2-oxoethyl)phenyl)-2,3-dihydrophthalazine-1,4-dione (3ae)**

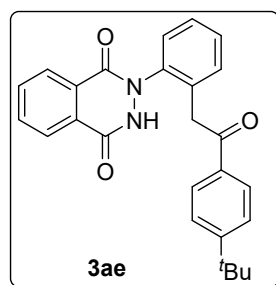

White solid (54.2 mg, 66% yield). Eluents for column chromatography: dichloromethane/ethyl acetate (45:1 v/v) to petroleum ether/ethyl acetate (10:1 v/v). <sup>1</sup>H NMR (DMSO-*d*<sub>6</sub>, 500 MHz)  $\delta$  11.77 (s, 1H), 8.17 (d, *J* = 5.0 Hz, 1H), 7.90-7.82 (m, 3H), 7.67 (d, *J* = 5.0 Hz, 2H), 7.43-7.40 (m, 4H), 7.27 (d, *J* = 5.0 Hz, 2H), 4.25 (s, 2H), 1.19 (s, 9H); <sup>13</sup>C NMR (DMSO-*d*<sub>6</sub>, 125 MHz)  $\delta$  196.8, 156.4, 134.3, 134.2, 133.8, 132.7, 131.8, 129.4, 128.9, 128.8, 128.4, 128.0, 127.1, 125.6, 41.2, 35.1, 31.2; IR (KBr): 3427, 2961, 1658, 1592, 1496, 1294, 1026, 824, 762, 696 (cm<sup>-1</sup>); HRMS (ESI) *m/z* calcd for C<sub>26</sub>H<sub>24</sub>N<sub>2</sub>O<sub>3</sub>Na [M+Na]<sup>+</sup>: 435.1679; found: 435.1660.

**2-(2-(2-([1,1'-biphenyl]-4-yl)-2-oxoethyl)phenyl)-2,3-dihydrophthalazine-1,4-dione (3af)**

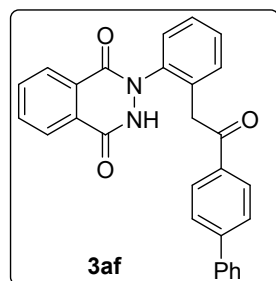

White solid (45.6 mg, 53% yield). Eluents for column chromatography: dichloromethane/ethyl acetate (45:1 v/v) to petroleum ether/ethyl acetate (10:1 v/v). <sup>1</sup>H NMR (DMSO-*d*<sub>6</sub>, 500 MHz)  $\delta$  11.82 (s, 1H), 8.18 (d, *J* = 5.0 Hz, 1H), 7.89-7.87 (m, 1H), 7.84-7.80 (m, 4H), 7.60 (d, *J* = 5.0 Hz,

2H), 7.55 (d,  $J = 5.0$  Hz, 2H), 7.48-7.45 (m, 3H), 7.42-7.38 (m, 4H), 4.33 (s, 2H);  $^{13}\text{C}$  NMR (DMSO- $d_6$ , 125 MHz)  $\delta$  196.6, 144.4, 139.0, 135.4, 133.8, 133.4, 132.4, 131.6, 129.2, 129.1, 128.8, 128.6, 128.5, 127.8, 127.1, 126.8, 126.7, 41.1; IR (KBr): 2924, 1636, 1599, 1493, 1349, 1291, 1221, 993, 758, 692 ( $\text{cm}^{-1}$ ); HRMS (ESI)  $m/z$  calcd for  $\text{C}_{28}\text{H}_{20}\text{N}_2\text{O}_3\text{Na}$  [ $\text{M}+\text{Na}$ ] $^+$ : 455.1366; found: 455.1342.

**2-(2-(2-(4-fluorophenyl)-2-oxoethyl)phenyl)-2,3-dihydrophthalazine-1,4-dione (3ag)**<sup>[3]</sup>

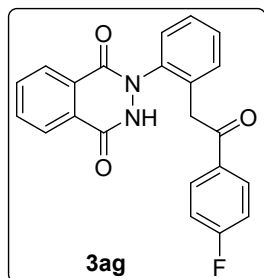

White solid (44.7 mg, 60% yield). Eluents for column chromatography: dichloromethane/ethyl acetate (24:1 v/v) to petroleum ether/ethyl acetate (10:1 v/v).  $^1\text{H}$  NMR (DMSO- $d_6$ , 500 MHz)  $\delta$  11.76 (s, 1H), 8.14 (d,  $J = 10.0$  Hz, 1H), 7.90-7.89 (m, 2H), 7.86-7.82 (m, 2H), 7.81-7.78 (m, 1H), 7.45-7.40 (m, 4H), 7.09-7.06 (m, 2H), 4.27 (s, 2H);  $^{13}\text{C}$  NMR (DMSO- $d_6$ , 125 MHz)  $\delta$  195.7, 164.9 (d,  $^1J_{\text{C-F}} = 250.0$  Hz), 157.5, 150.7, 141.0, 133.7, 133.5, 133.3 (d,  $^4J_{\text{C-F}} = 2.5$  Hz), 132.4, 131.7, 131.1 (d,  $^3J_{\text{C-F}} = 8.8$  Hz), 129.1, 128.5 (d,  $^3J_{\text{C-F}} = 8.8$  Hz), 127.8, 126.8, 124.9, 124.3, 115.5 (d,  $^2J_{\text{C-F}} = 22.5$  Hz), 41.1.

**2-(2-(2-(4-chlorophenyl)-2-oxoethyl)phenyl)-2,3-dihydrophthalazine-1,4-dione (3ah)**<sup>[3]</sup>

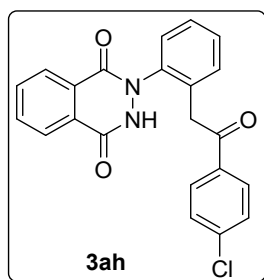

White solid (51.8 mg, 66% yield). Eluents for column chromatography: dichloromethane/ethyl acetate (24:1 v/v) to petroleum ether/ethyl acetate (10:1 v/v).  $^1\text{H}$  NMR (DMSO- $d_6$ , 500 MHz)  $\delta$  11.76 (s, 1H), 8.13 (d,  $J = 5.0$  Hz, 1H), 7.92-7.83 (m, 3H), 7.71 (d,  $J = 10.0$  Hz, 2H), 7.45-7.40 (m, 4H), 7.31 (d,  $J = 10.0$  Hz, 2H), 4.26 (s, 2H);  $^{13}\text{C}$  NMR (DMSO- $d_6$ , 125 MHz)  $\delta$  196.2, 141.0, 138.0, 135.3, 133.6, 133.5, 132.4, 131.7, 129.9, 129.0, 128.6, 127.8, 126.7, 124.2, 41.1.

**2-(2-(2-(4-bromophenyl)-2-oxoethyl)phenyl)-2,3-dihydrophthalazine-1,4-dione (3ai)**

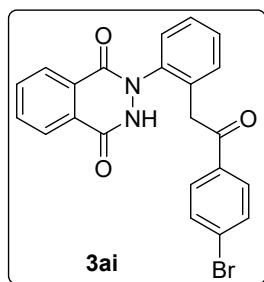

White solid (46.4 mg, 53% yield). Eluents for column chromatography: dichloromethane/ethyl

acetate (24:1 v/v) to petroleum ether/ethyl acetate (10:1 v/v).  $^1\text{H}$  NMR (DMSO- $d_6$ , 500 MHz)  $\delta$  11.77 (s, 1H), 8.13 (d,  $J = 5.0$  Hz, 1H), 7.90-7.84 (m, 3H), 7.63 (d,  $J = 5.0$  Hz, 2H), 7.45-7.40 (m, 6H), 4.26 (s, 2H);  $^{13}\text{C}$  NMR (DMSO- $d_6$ , 125 MHz)  $\delta$  196.4, 157.4, 150.6, 135.6, 133.6, 133.5, 132.4, 131.7, 131.5, 130.0, 129.0, 128.6, 128.6, 128.5, 127.8, 127.2, 126.7, 126.1, 124.2, 41.1; IR (KBr): 3067, 2924, 1639, 1584, 1496, 1397, 1349, 1217, 1066, 692 ( $\text{cm}^{-1}$ ); HRMS (ESI)  $m/z$  calcd for  $\text{C}_{22}\text{H}_{15}\text{BrN}_2\text{O}_3\text{Na}$   $[\text{M}+\text{Na}]^+$ : 457.0158; found: 457.0144.

**2-(2-(2-(2,4-difluorophenyl)-2-oxoethyl)phenyl)-2,3-dihydrophthalazine-1,4-dione (3aj)**

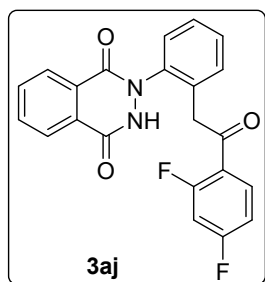

White solid (57.9 mg, 74% yield). Eluents for column chromatography: dichloromethane/ethyl acetate (24:1 v/v) to petroleum ether/ethyl acetate (10:1 v/v).  $^1\text{H}$  NMR (DMSO- $d_6$ , 500 MHz)  $\delta$  11.82 (s, 1H), 8.12 (d,  $J = 10.0$  Hz, 1H), 7.91-7.90 (m, 2H), 7.86-7.82 (m, 1H), 7.58-7.53 (m, 1H), 7.46-7.40 (m, 4H), 7.13-7.08 (m, 1H), 6.96-6.92 (m, 1H), 4.24 (s, 2H);  $^{13}\text{C}$  NMR (DMSO- $d_6$ , 125 MHz)  $\delta$  194.0, 157.4, 133.6, 133.1, 132.5, 131.9, 131.0, 129.0, 128.6, 128.4, 127.9, 126.7, 126.2, 124.3, 122.7, 112.1 (d,  $^2J_{\text{C-F}} = 21.3$  Hz), 104.9 (t,  $^2J_{\text{C-F}} = 25.0$  Hz), 44.8 (d,  $^4J_{\text{C-F}} = 6.3$  Hz); IR (KBr): 3067, 2924, 1691, 1636, 1602, 1493, 1257, 1103, 853, 692 ( $\text{cm}^{-1}$ ); HRMS (ESI)  $m/z$  calcd for  $\text{C}_{22}\text{H}_{14}\text{F}_2\text{N}_2\text{O}_3\text{Na}$   $[\text{M}+\text{Na}]^+$ : 415.0865; found: 415.0848.

**2-(2-(2-(3,4-difluorophenyl)-2-oxoethyl)phenyl)-2,3-dihydrophthalazine-1,4-dione (3ak)**

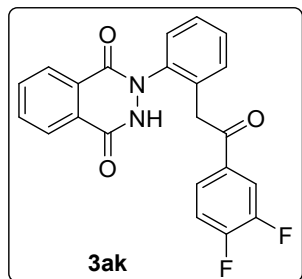

White solid (44.1 mg, 56% yield). Eluents for column chromatography: dichloromethane/ethyl acetate (45:1 v/v) to petroleum ether/ethyl acetate (10:1 v/v).  $^1\text{H}$  NMR (DMSO- $d_6$ , 500 MHz)  $\delta$  11.76 (s, 1H), 8.13 (d,  $J = 5.0$  Hz, 1H), 7.93-7.84 (m, 3H), 7.71-7.67 (m, 1H), 7.60 (s, 1H), 7.48-7.41 (m, 4H), 7.35-7.30 (m, 1H), 4.27 (s, 2H);  $^{13}\text{C}$  NMR (DMSO- $d_6$ , 125 MHz)  $\delta$  195.2, 134.2, 133.6 (d,  $^3J_{\text{C-F}} = 10.0$  Hz), 132.4, 131.8, 129.1, 128.6 (d,  $^4J_{\text{C-F}} = 2.5$  Hz), 127.9, 126.7, 125.9 (q,  $^4J_{\text{C-F}} = 3.8$  Hz), 124.2, 117.7 (d,  $^3J_{\text{C-F}} = 17.5$  Hz), 117.3 (d,  $^3J_{\text{C-F}} = 17.5$  Hz), 41.0; IR (KBr): 3072, 1632, 1602, 1515, 1426, 1349, 1279, 1155, 890, 692 ( $\text{cm}^{-1}$ ); HRMS (ESI)  $m/z$  calcd for  $\text{C}_{22}\text{H}_{14}\text{F}_2\text{N}_2\text{O}_3\text{Na}$   $[\text{M}+\text{Na}]^+$ : 415.0865; found: 415.0849.

**2-(2-(2-(3,4-dichlorophenyl)-2-oxoethyl)phenyl)-2,3-dihydrophthalazine-1,4-dione (3al)**

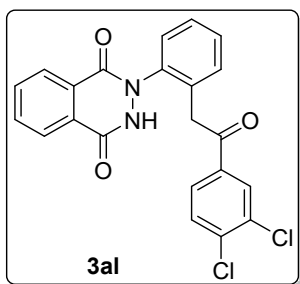

White solid (47.4 mg, 56% yield). Eluents for column chromatography: dichloromethane/ethyl acetate (45:1 v/v) to petroleum ether/ethyl acetate (10:1 v/v).  $^1\text{H}$  NMR (DMSO- $d_6$ , 500 MHz)  $\delta$  11.76 (s, 1H), 8.09 (d,  $J = 10.0$  Hz, 1H), 7.92-7.81 (m, 4H), 7.64 (d,  $J = 10.0$  Hz, 1H), 7.50-7.40 (m, 5H), 4.27 (s, 2H);  $^{13}\text{C}$  NMR (DMSO- $d_6$ , 125 MHz)  $\delta$  195.6, 136.8, 135.8, 133.5, 132.4, 131.8, 131.6, 130.8, 129.8, 128.9, 128.5, 128.0, 127.9, 126.6, 124.1, 41.0; IR (KBr): 2924, 1636, 1602, 1496, 1393, 1206, 1026, 821, 754, 692 ( $\text{cm}^{-1}$ ); HRMS (ESI)  $m/z$  calcd for  $\text{C}_{22}\text{H}_{14}\text{Cl}_2\text{N}_2\text{O}_3\text{Na}$   $[\text{M}+\text{Na}]^+$ : 447.0274; found: 447.0262.

**2-(2-(2-(benzo[d][1,3]dioxol-5-yl)-2-oxoethyl)phenyl)-2,3-dihydrophthalazine-1,4-dione (3am)**

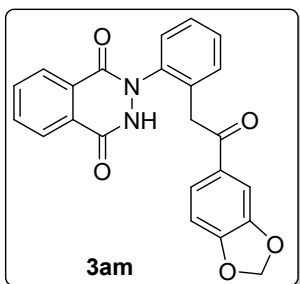

White solid (49.9 mg, 62% yield). Eluents for column chromatography: dichloromethane/ethyl acetate (45:1 v/v) to petroleum ether/ethyl acetate (10:1 v/v).  $^1\text{H}$  NMR (DMSO- $d_6$ , 500 MHz)  $\delta$  11.78 (s, 1H), 8.15 (d,  $J = 5.0$  Hz, 1H), 7.90-7.89 (m, 2H), 7.85-7.82 (m, 1H), 7.41-7.39 (m, 4H), 7.35-7.33 (m, 1H), 7.13 (s, 1H), 6.71-6.70 (m, 1H), 6.00 (s, 2H), 4.18 (s, 2H);  $^{13}\text{C}$  NMR (125 MHz, DMSO)  $\delta$  195.3, 157.5, 151.3, 147.6, 141.0, 134.3, 133.5, 132.4, 131.6, 131.3, 129.1, 128.6, 128.5, 127.7, 126.8, 124.6, 124.3, 107.8, 107.5, 102.1, 99.8, 40.9; IR (KBr): 3075, 2917, 1669, 1592, 1496, 1441, 1353, 1254, 1037, 692 ( $\text{cm}^{-1}$ ); HRMS (ESI)  $m/z$  calcd for  $\text{C}_{23}\text{H}_{16}\text{N}_2\text{O}_5\text{Na}$   $[\text{M}+\text{Na}]^+$ : 423.0951; found: 423.0938.

**2-(2-(2-(naphthalen-1-yl)-2-oxoethyl)phenyl)-2,3-dihydrophthalazine-1,4-dione (3an)<sup>[3]</sup>**

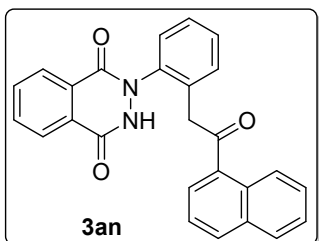

White solid (53.5 mg, 66% yield). Eluents for column chromatography: dichloromethane/ethyl acetate (45:1 v/v) to petroleum ether/ethyl acetate (10:1 v/v).  $^1\text{H}$  NMR (DMSO- $d_6$ , 500 MHz)  $\delta$  11.82 (s, 1H), 8.13-8.09 (m, 2H), 7.94-7.78 (m, 7H), 7.54-7.52 (m, 1H), 7.46-7.42 (m, 4H), 7.39-7.34 (m, 2H), 4.47 (s, 2H);  $^{13}\text{C}$  NMR (DMSO- $d_6$ , 125 MHz)  $\delta$  200.6, 157.4, 135.4, 133.5, 133.4,

133.3, 132.4, 132.4, 131.9, 129.4, 129.1, 128.6, 128.5, 128.4, 127.9, 127.5, 126.7, 126.4, 125.5, 124.6, 124.3, 45.1.

### 2-(2-(2-oxo-2-(thiophen-3-yl)ethyl)phenyl)-2,3-dihydrophthalazine-1,4-dione (**3ao**)

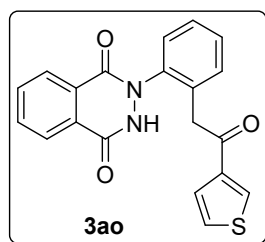

White solid (39.9 mg, 55% yield). Eluents for column chromatography: dichloromethane/ethyl acetate (45:1 v/v) to petroleum ether/ethyl acetate (10:1 v/v). <sup>1</sup>H NMR (DMSO-*d*<sub>6</sub>, 500 MHz)  $\delta$  11.78 (s, 1H), 8.25 (s, 1H), 8.19 (d, *J* = 10.0 Hz, 1H), 7.92 (s, 2H), 7.87 (s, 1H), 7.41 (s, 5H), 7.28 (s, 1H), 4.17 (s, 2H); <sup>13</sup>C NMR (DMSO-*d*<sub>6</sub>, 125 MHz)  $\delta$  191.2, 157.6, 141.7, 133.9, 133.6, 132.5, 131.5, 129.2, 128.6, 128.6, 128.5, 127.8, 127.3, 126.8, 126.7, 126.2, 124.4, 42.2; IR (KBr): 3097, 2924, 1658, 1636, 1496, 1397, 1287, 1243, 1199, 692 (cm<sup>-1</sup>); HRMS (ESI) *m/z* calcd for C<sub>20</sub>H<sub>14</sub>N<sub>2</sub>O<sub>3</sub>SNa [M+Na]<sup>+</sup>: 385.0617; found: 385.0605.

### 2-(2-(3,3-dimethyl-2-oxobutyl)phenyl)-2,3-dihydrophthalazine-1,4-dione (**3ap**)<sup>[3]</sup>

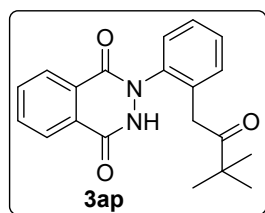

White solid (17.3 mg, 26% yield). Eluents for column chromatography: dichloromethane/ethyl acetate (45:1 v/v) to petroleum ether/ethyl acetate (10:1 v/v). <sup>1</sup>H NMR (DMSO-*d*<sub>6</sub>, 500 MHz)  $\delta$  11.89 (s, 1H), 8.28 (d, *J* = 5.0 Hz, 1H), 8.01-8.00 (m, 1H), 7.96-7.89 (m, 2H), 7.38-7.38 (m, 3H), 7.32-7.30 (m, 1H), 3.86 (s, 2H), 0.85 (s, 9H); <sup>13</sup>C NMR (DMSO-*d*<sub>6</sub>, 125 MHz)  $\delta$  210.9, 157.3, 150.6, 141.0, 133.8, 133.2, 132.7, 132.3, 129.2, 128.3, 128.1, 127.5, 126.9, 125.0, 124.4, 43.8, 39.4, 26.2.

## 4. Synthesis of (*E*)-2-(2-(2-hydrazono-2-phenylethyl)phenyl)-2,3-dihydrophthalazine-1,4-dione (**5**)<sup>[4]</sup>

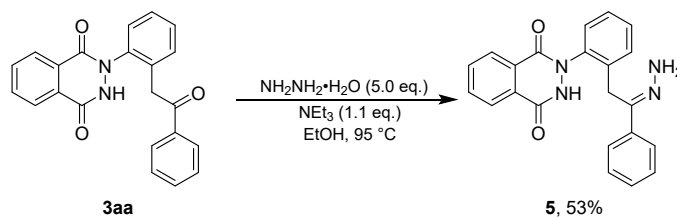

**3aa** (0.2 mmol, 71.3 mg) was added slowly a mixture of hydrazine monohydrate (1 mmol, 50.1 mg) and triethylamine (0.22 mmol, 22.3 mg) at room temperature. The

mixture was heated at 95°C for 1 h and sealed with a Teflon lined cap. Then, the solvent was removed under reduced pressure, and the residue was purified via silica gel chromatography (eluent: petroleum ether/ethyl acetate = 1:2) to give product **5** in 53% yield.

**(E)-2-(2-(2-hydrazono-2-phenylethyl)phenyl)-2,3-dihydrophthalazine-1,4-dione (**5**)**

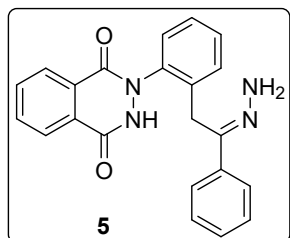

White solid (39.6 mg, 53% yield). <sup>1</sup>H NMR (DMSO-*d*<sub>6</sub>, 500 MHz) δ 11.92 (s, 1H), 8.32 (d, *J* = 10.0 Hz, 1H), 8.05 (d, *J* = 5.0 Hz, 1H), 7.99-7.92 (m, 2H), 7.57 (d, *J* = 10.0 Hz, 2H), 7.46 (d, *J* = 10.0 Hz, 1H), 7.39-7.32 (m, 2H), 7.25-7.22 (m, 2H), 7.15-7.12 (m, 1H), 7.08 (d, *J* = 10.0 Hz, 1H), 6.53 (s, 2H) 3.81 (s, 2H); <sup>13</sup>C NMR (126 MHz, DMSO) δ 157.71, 151.16, 142.06, 141.23, 139.36, 133.90, 133.76, 132.68, 129.21, 129.00, 128.79, 128.32, 128.09, 127.54, 127.16, 127.02, 125.28, 124.91, 124.60, 26.61. IR (KBr): 2924, 2851, 1650, 1584, 1496, 1327, 1291, 1199, 762, 692 (cm<sup>-1</sup>); HRMS (ESI) *m/z* calcd for C<sub>22</sub>H<sub>18</sub>N<sub>4</sub>O<sub>2</sub>Na [M+Na]<sup>+</sup>: 393.1322; found: 393.1310.

**5. Synthesis of 6-phenylphthalazino[2,3-*a*]cinnoline-8,13-dione (**6**)<sup>[5]</sup>**

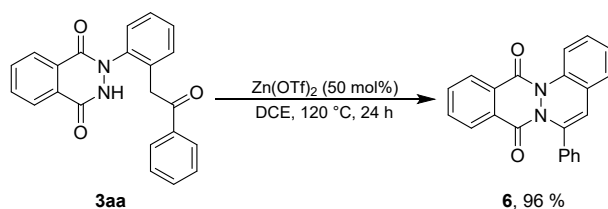

The mixture of **3aa** (0.2 mmol, 71.3 mmg), Zn(OTf)<sub>2</sub> (50m%, 36.4 mg) and DCE (1 mL) was sealed with a Teflon lined cap. The reaction mixture was stirred at 120 °C for 24 h. Then, the solvent was evaporated under reduced pressure and the residue was purified by flash column chromatography on silica gel (petroleum ether/ethyl acetate = 10:1) gave the product **6** in 96% yield.

**5-phenylphthalazino[2,3-*a*]cinnoline-8,13-dione (**6**)<sup>[3]</sup>**

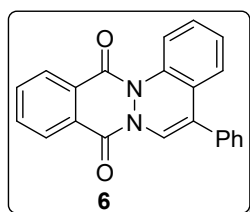

Yellow solid (64.8 mg, 96% yield). <sup>1</sup>H NMR (DMSO-*d*<sub>6</sub>, 500 MHz) δ 8.36 (d, *J* = 10.0 Hz, 1H),



8.07-7.96 (m, 3H), 7.89 (d,  $J = 10.0$  Hz, 1H), 7.42 (d,  $J = 5.0$  Hz, 1H) 7.34-7.25 (m, 7H), 6.77 (s, 1H);  $^{13}\text{C}$  NMR (DMSO- $d_6$ , 125 MHz)  $\delta$  157.9, 156.1, 139.0, 136.1, 134.6, 134.4, 133.9, 129.7, 129.1, 128.5, 128.4, 128.4, 128.3, 127.3, 126.7, 126.3, 126.2, 126.2, 124.8, 118.8, 116.1.

## 6. Control Experiments

### (1) H/D exchange experiment

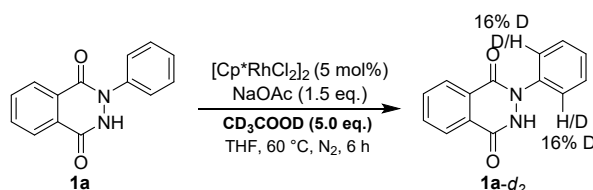

A reaction flask was charged with a mixture of  $[\text{Cp}^*\text{RhCl}_2]_2$  (6.2 mg, 0.01 mmol, 5 mol %), NaOAc (24.6 mg, 0.3 mmol, 1.5 equiv.), **1a** (0.20 mmol), **2a** (0.4 mmol, 2.0 equiv.),  $\text{CD}_3\text{COOD}$  (64.1 mg, 1.0 mmol, 5.0 equiv.) and THF (1.0 mL). The reaction was stirred at 60 °C under  $\text{N}_2$  for 6 h, then immediately quenched with EtOAc. The volatiles were removed under reduced pressure. The crude product was purified by column chromatography on silica gel (eluent: petroleum ether /ethyl acetate = 3:1) to afford **1a- $d_2$** . The result was observed by  $^1\text{H}$  NMR determination.

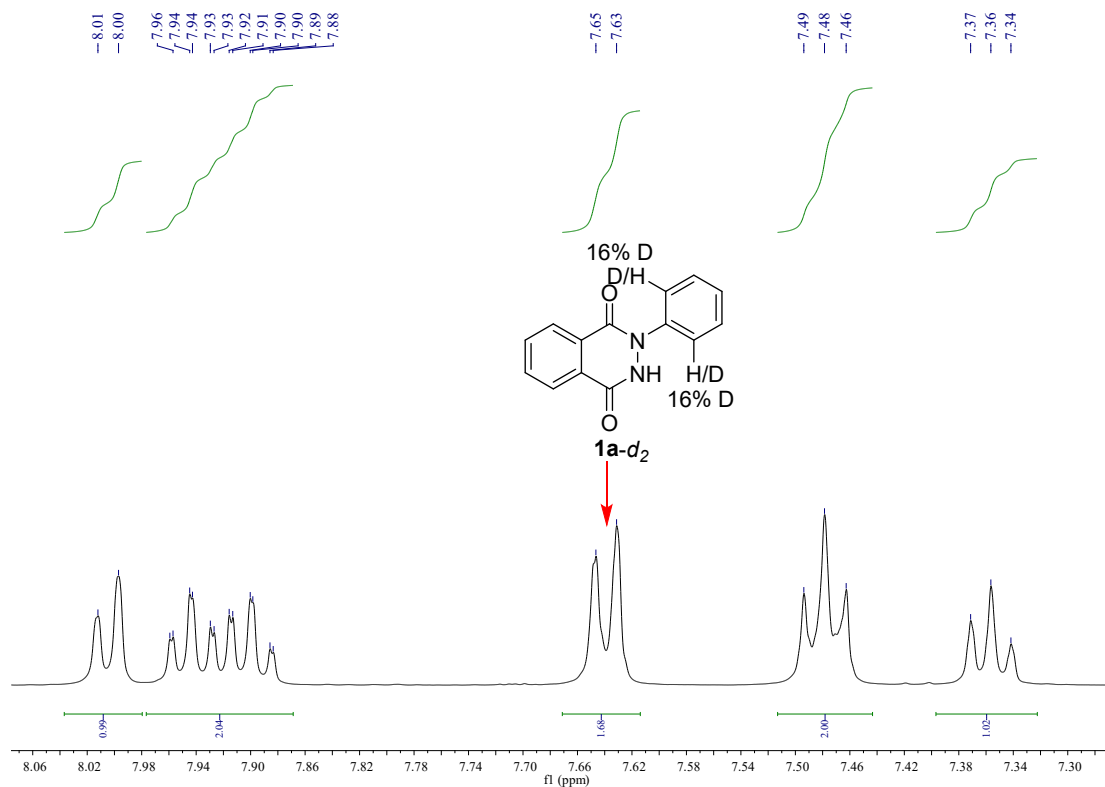

### (2) Experiment of deuterium kinetic isotope effect

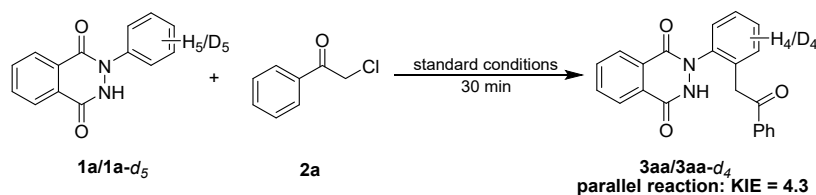

A reaction flask was charged with a mixture of [Cp\**RhCl*<sub>2</sub>]<sub>2</sub> (6.2 mg, 0.01 mmol, 5 mol %), NaOAc (24.6 mg, 0.3 mmol, 1.5 equiv.), **1a** (0.10 mmol), **1a-d<sub>5</sub>** (0.10 mmol), **2a** (0.2 mmol, 2.0 equiv.) and THF (1.0 mL). The reaction was stirred at 60 °C under N<sub>2</sub> for 30 min, then immediately quenched with EtOAc. The volatiles were removed under reduced pressure. The crude product was purified by column chromatography on silica gel (eluent: dichloromethane = 24:1/ethyl acetate to petroleum ether/ethyl acetate = 10:1) to afford **3aa** and **3aa-d<sub>4</sub>**. A 4.3 of KIE was observed by <sup>1</sup>H NMR determination.

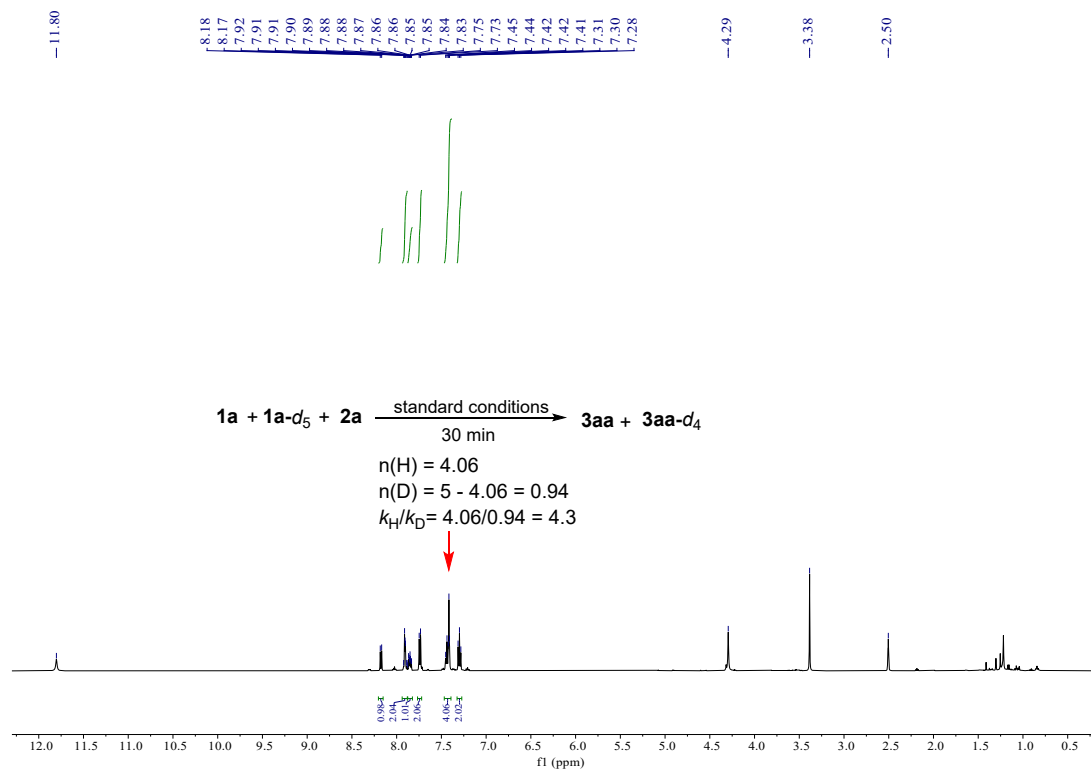

### (3) Experiment of competition experiment between **1c** and **1k**.

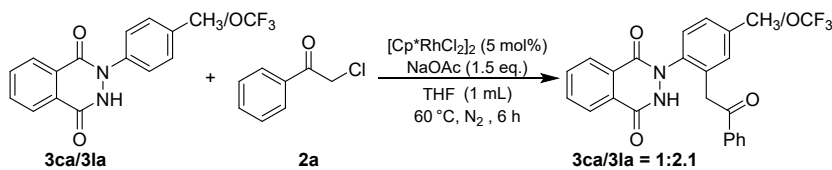

A reaction flask was charged with a mixture of [Cp\**RhCl*<sub>2</sub>]<sub>2</sub> (6.2 mg, 0.01 mmol, 5 mol %), NaOAc (24.6 mg, 0.3 mmol, 1.5 equiv.), **1c** (0.20 mmol), **1k** (0.20 mmol), **2a** (0.4 mmol, 2.0 equiv.) and THF (1.0 mL). The reaction was stirred at 60 °C under N<sub>2</sub> for 6

h, then immediately quenched with EtOAc. The volatiles were removed under reduced pressure. The crude product was purified by column chromatography on silica gel (eluent: dichloromethane = 45:1/ethyl acetate to petroleum ether/ethyl acetate = 10:1). The ratio 2.1 of **3ca** and **3la** was observed by <sup>1</sup>H NMR determination.

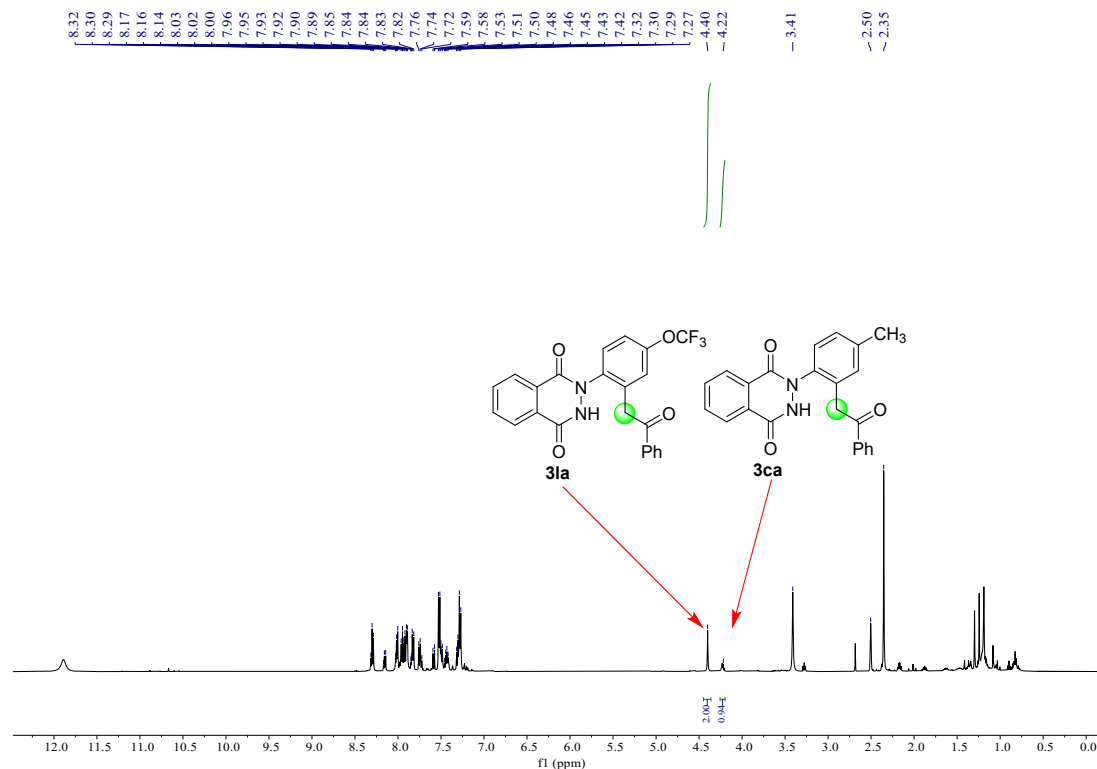

## 7. References:

1. Prakash, R.; Bora, B. R.; Boruah, R. C.; Gogoi, S. *Org. Lett.* **2018**, *20*, 2297.
2. a) Zhou, J.; Li, J.; Li, Y.; Wu, C.; He, G.; Yang, Q.; Zhou, Y.; Liu, H. *Org. Lett.* **2018**, *20*, 7645.  
b) Yin, C.; Wu, W.; Hu, Y.; Tan, X.; You, C.; Liu, Y.; Chen, Z.; Dong, X.; Zhang X. *Adv. Synth. Catal.* **2018**, *11*, 2119.
3. Karishma, P.; Agarwal, D. S.; Laha, B.; Mandal, S. K.; Sakhuja, R. *Chem. Asian J.* **2019**, *14*, 4274.
4. Pan, C.; Yuan, C.; Chen, D.; Chen, Y.; Yu, J. *Asian J. Org. Chem.* **2022**, *11*, e202100809.
5. Pan, C.; Yuan, C.; Yu, J. *Asian J. Org. Chem.* **2022**, *11*, e202200346.

## 8. Copies of $^1\text{H}$ and $^{13}\text{C}$ NMR Spectra of Products

$^1\text{H}$  NMR, 500 MHz,  $\text{DMSO-}d_6$

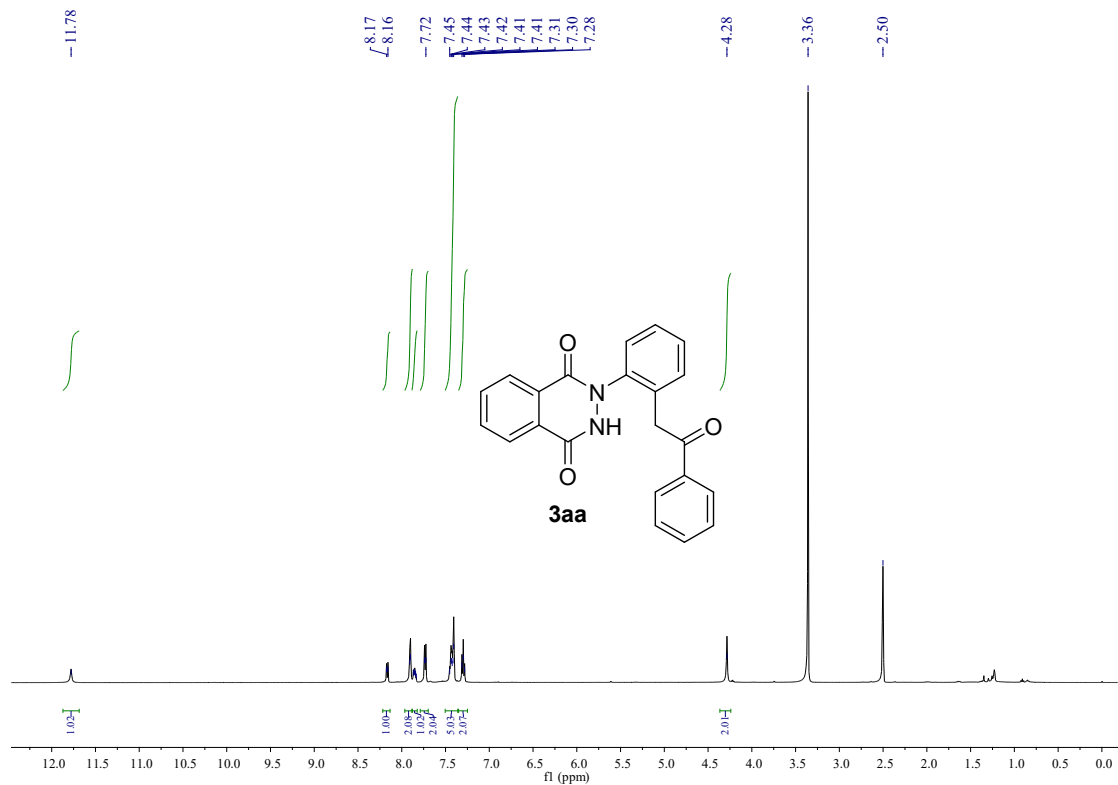

$^{13}\text{C}$  NMR, 125 MHz,  $\text{DMSO-}d_6$

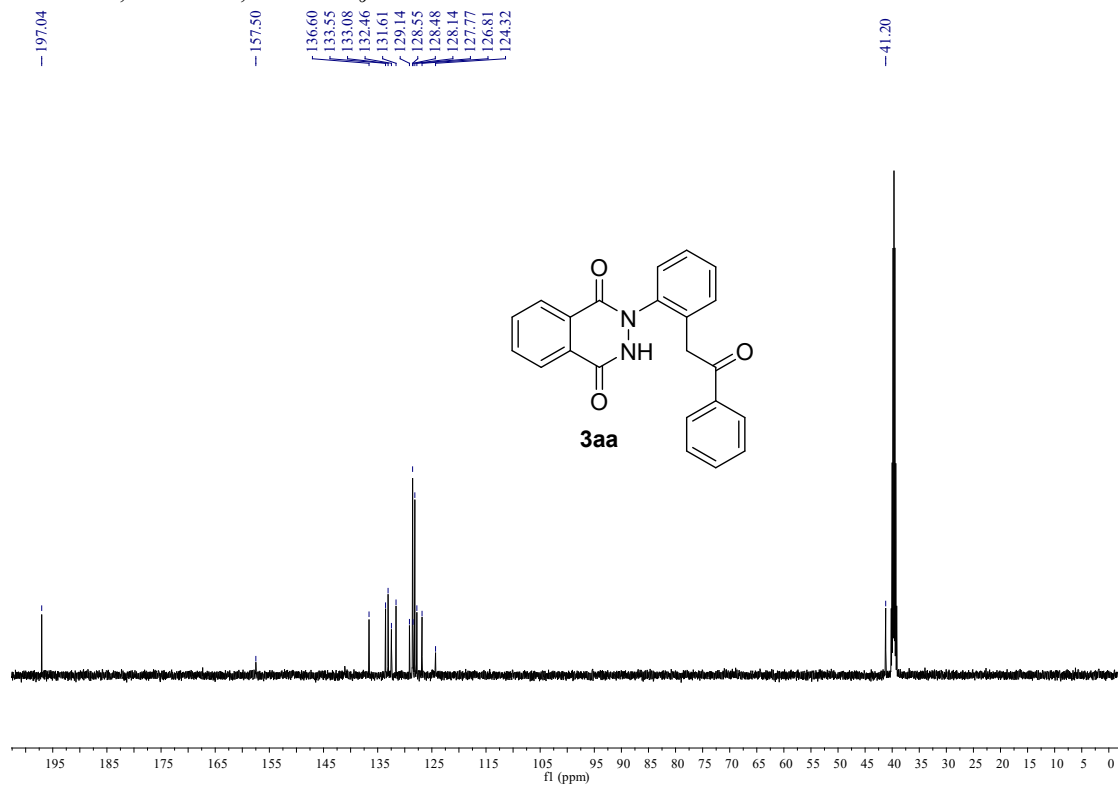

<sup>1</sup>H NMR, 500 MHz, DMSO-d<sub>6</sub>

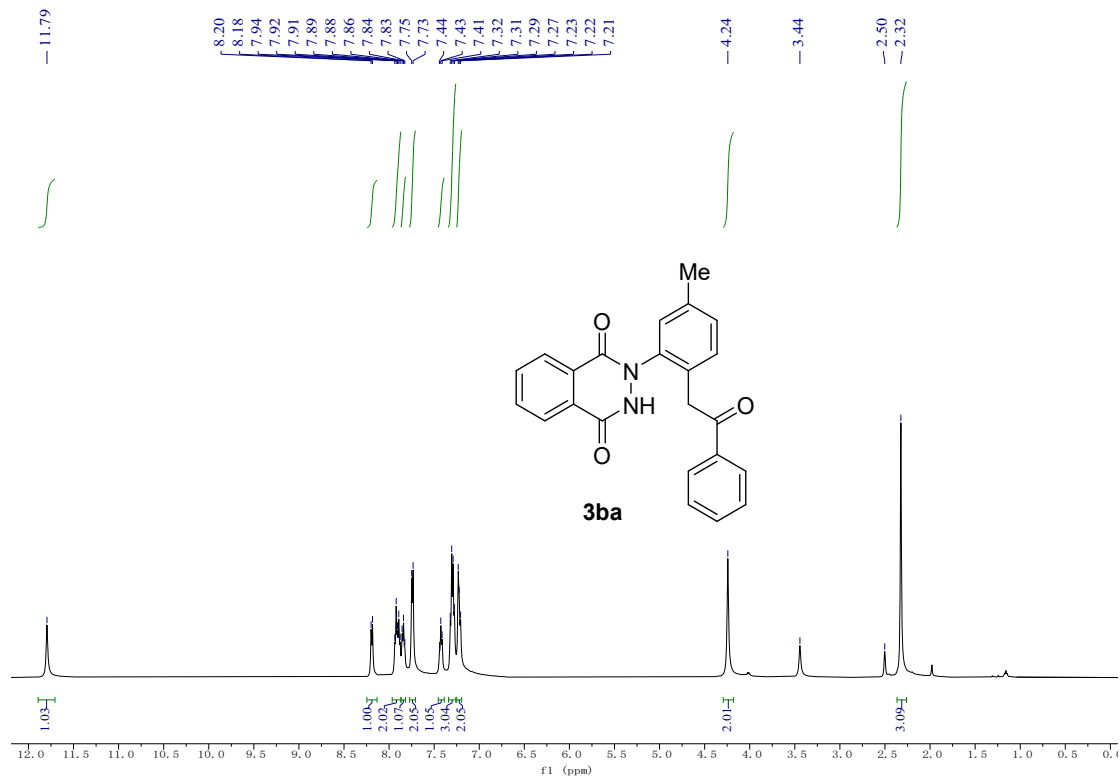

<sup>13</sup>C NMR, 125 MHz, DMSO-d<sub>6</sub>

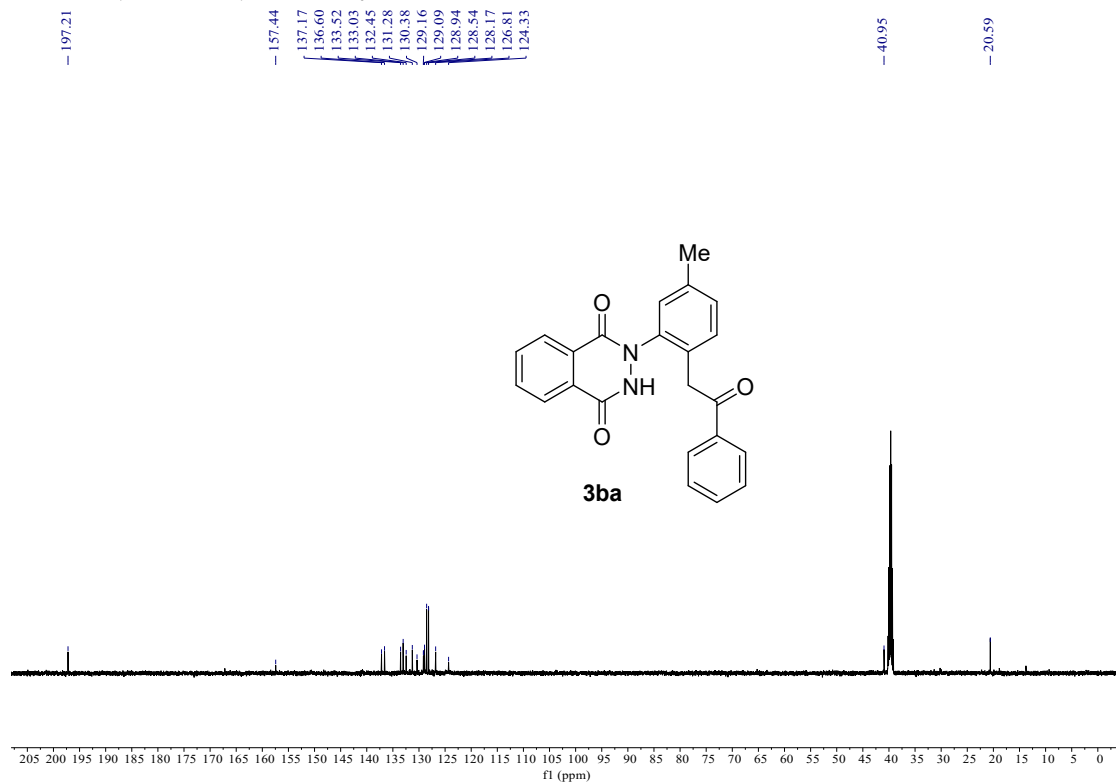

<sup>1</sup>H NMR, 500 MHz, DMSO-*d*<sub>6</sub>

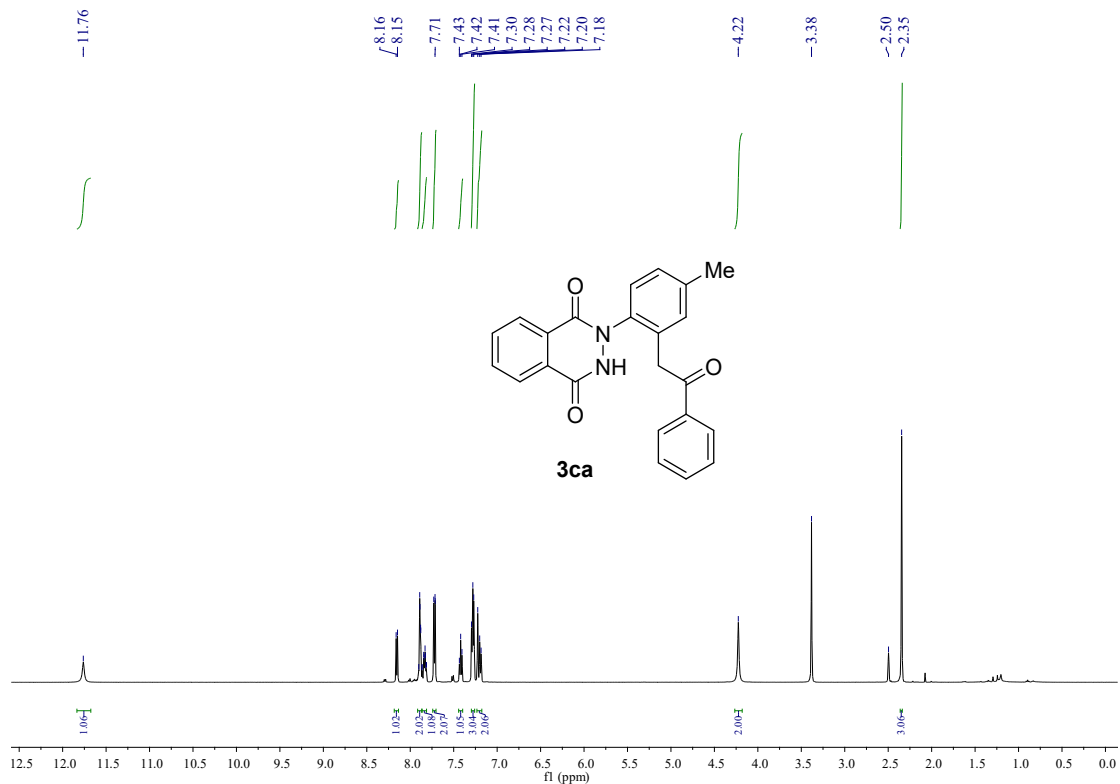

<sup>13</sup>C NMR, 125 MHz, DMSO-*d*<sub>6</sub>

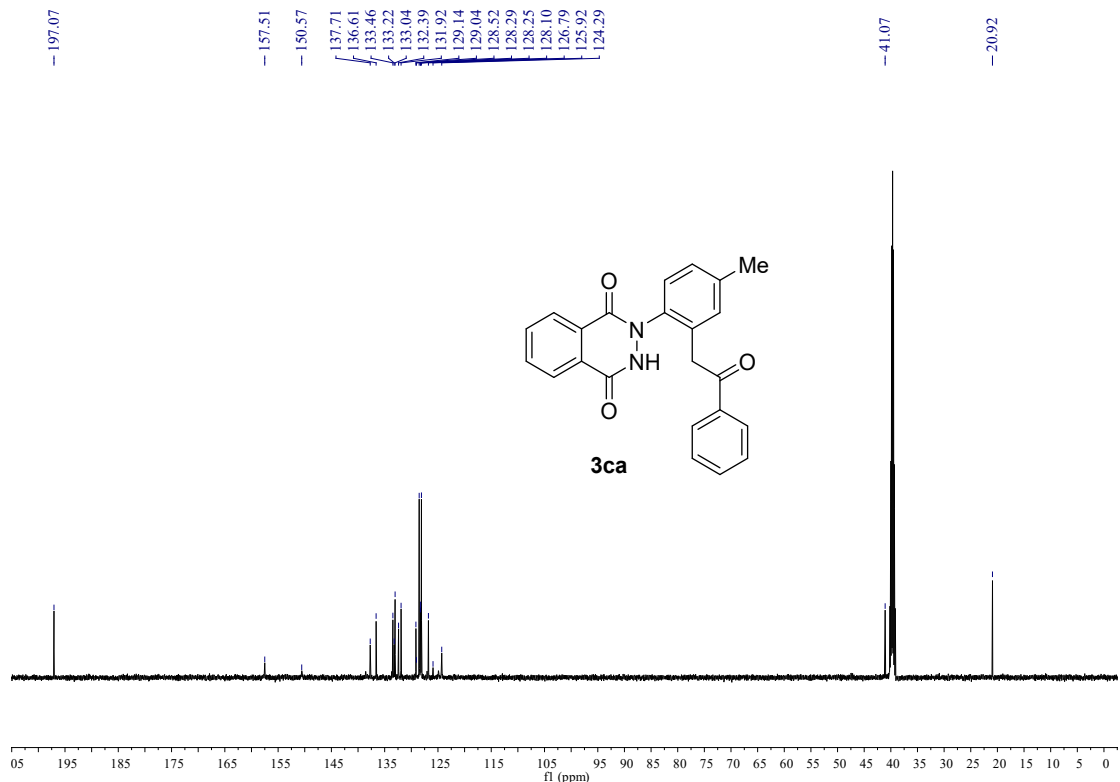

$^1\text{H}$  NMR, 500 MHz,  $\text{DMSO}-d_6$

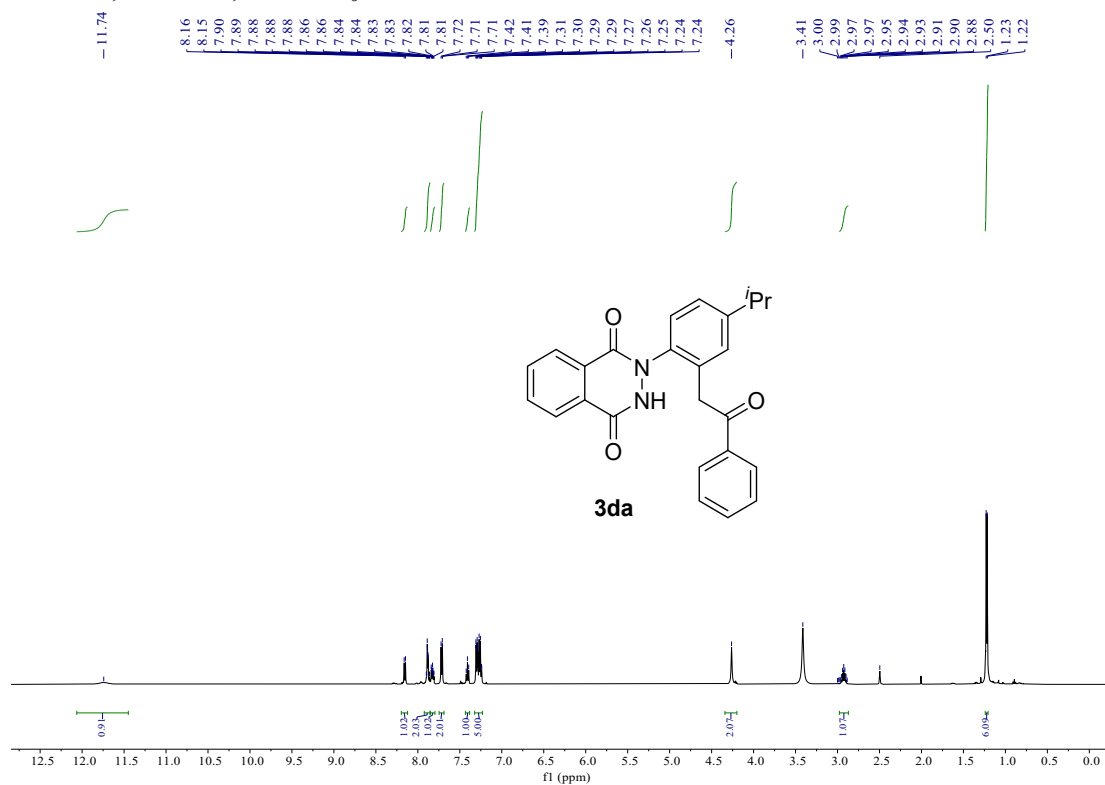

$^{13}\text{C}$  NMR, 125 MHz,  $\text{DMSO}-d_6$

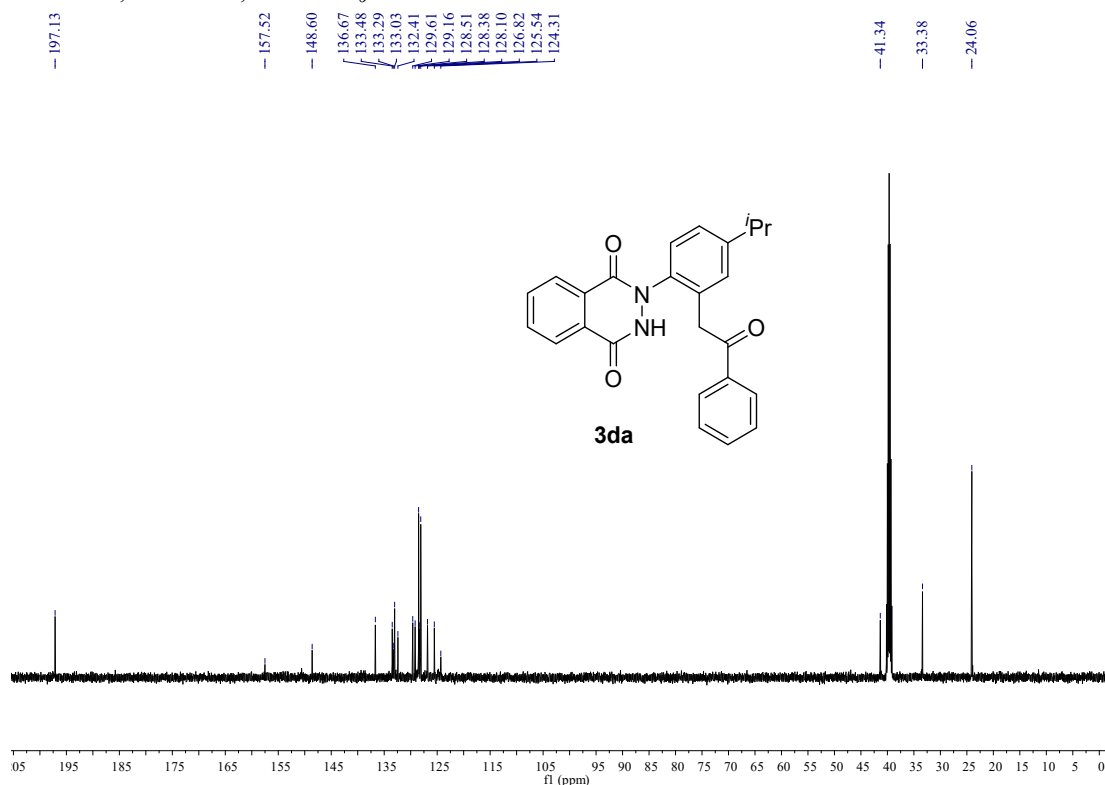

<sup>1</sup>H NMR, 500 MHz, DMSO-d<sub>6</sub>

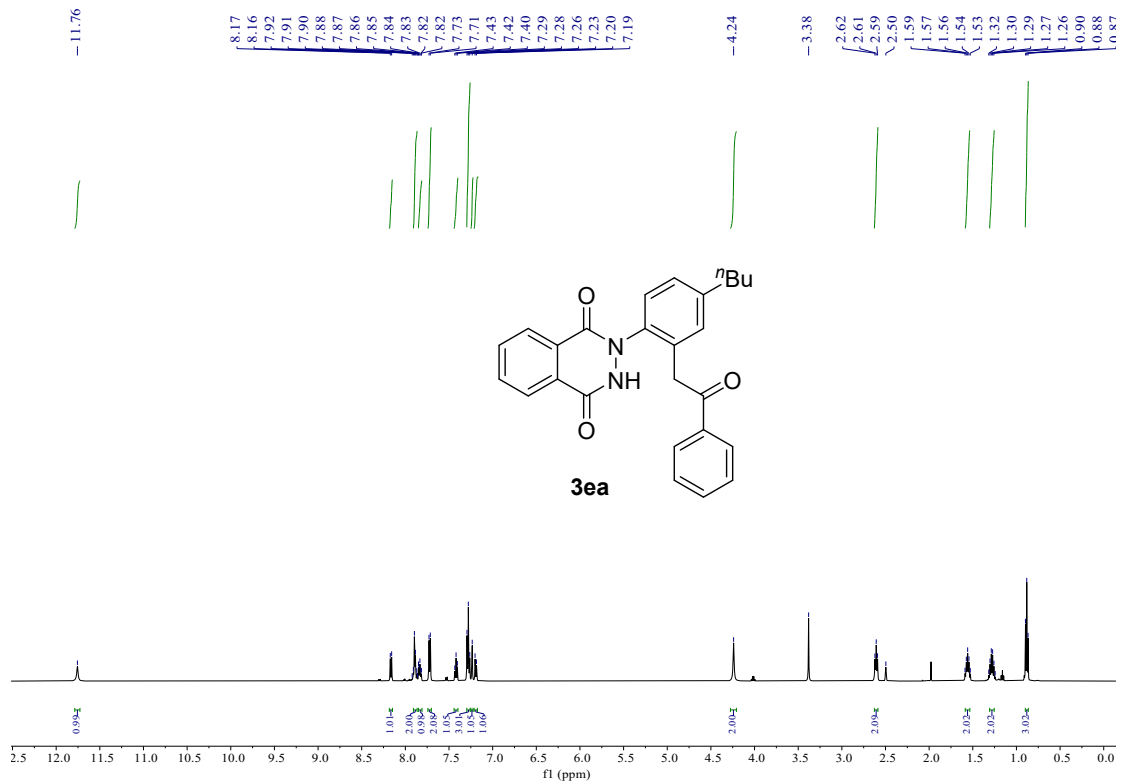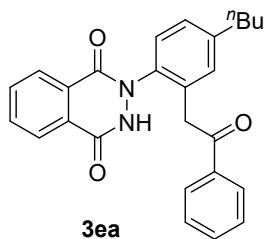

<sup>13</sup>C NMR, 125 MHz, DMSO-d<sub>6</sub>

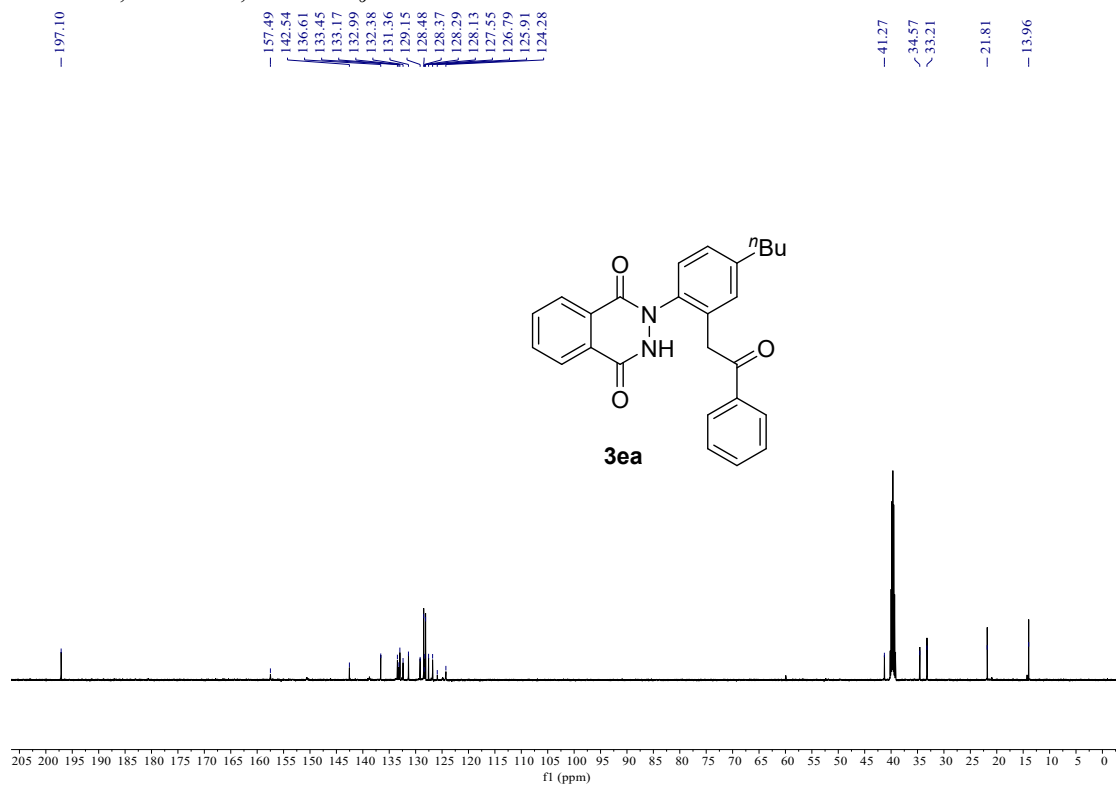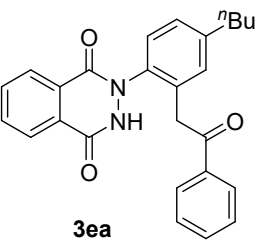



$^1\text{H}$  NMR, 500 MHz,  $\text{DMSO-}d_6$

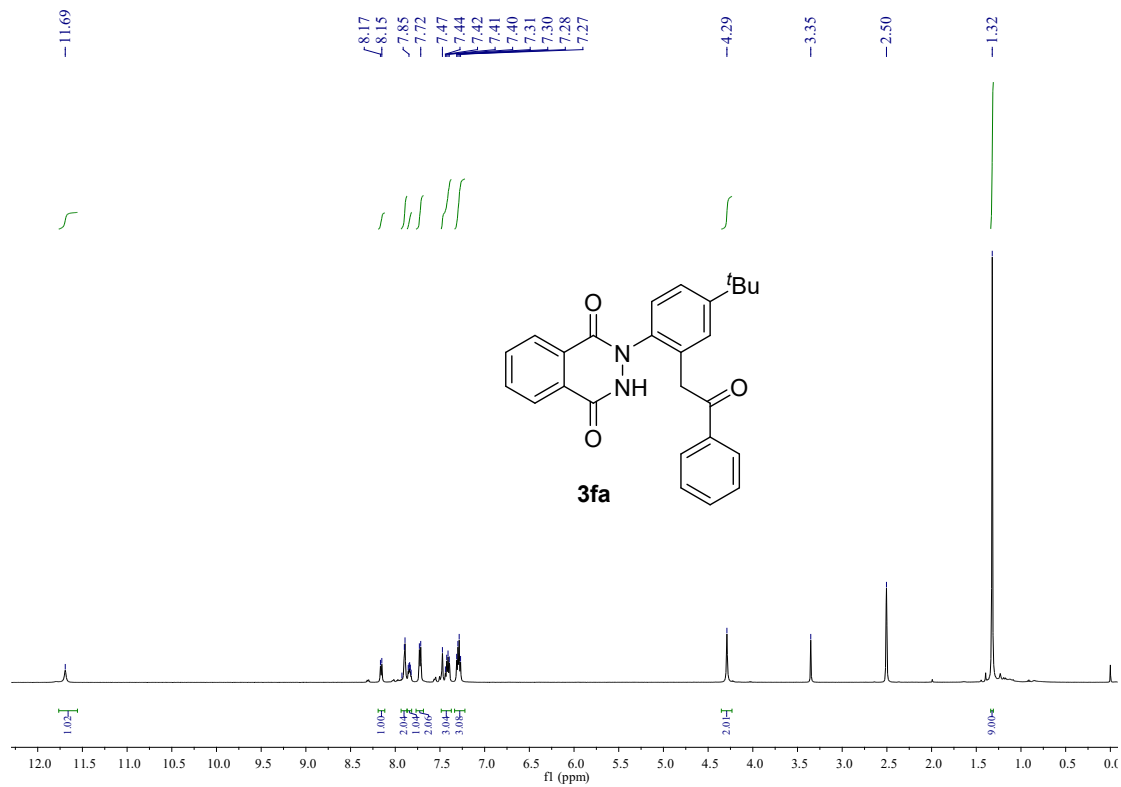

$^{13}\text{C}$  NMR, 125 MHz,  $\text{DMSO-}d_6$

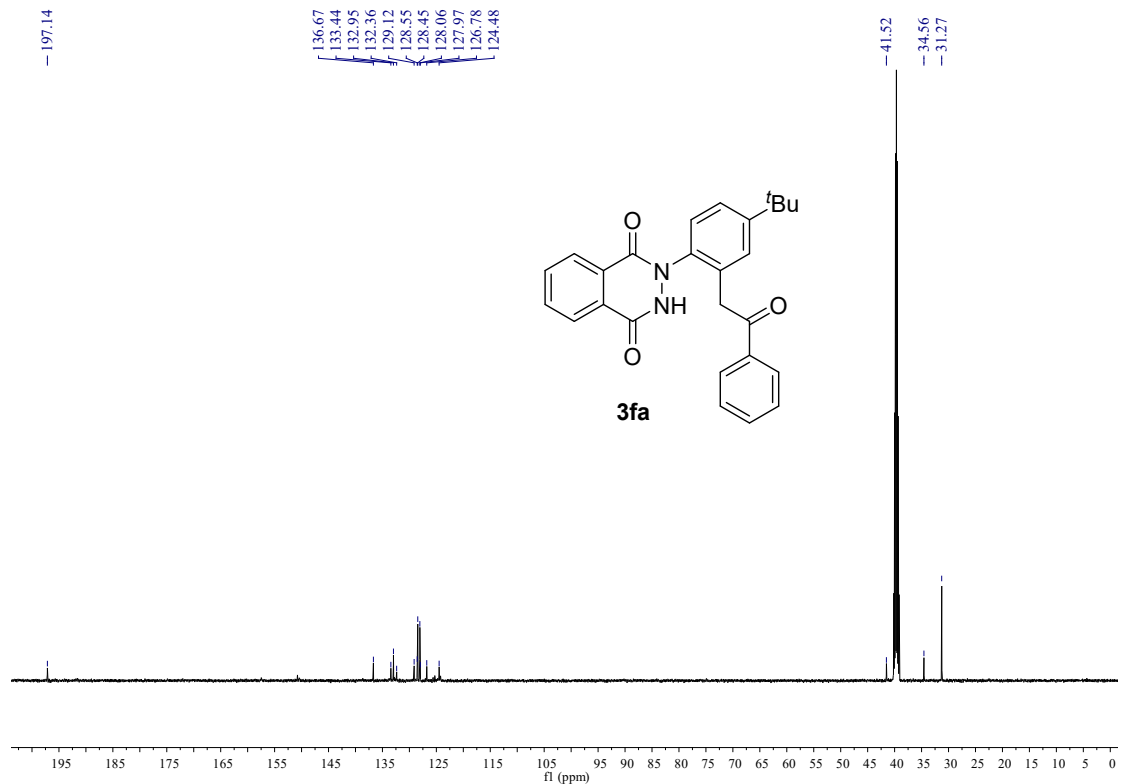

<sup>1</sup>H NMR, 500 MHz, DMSO-d<sub>6</sub>

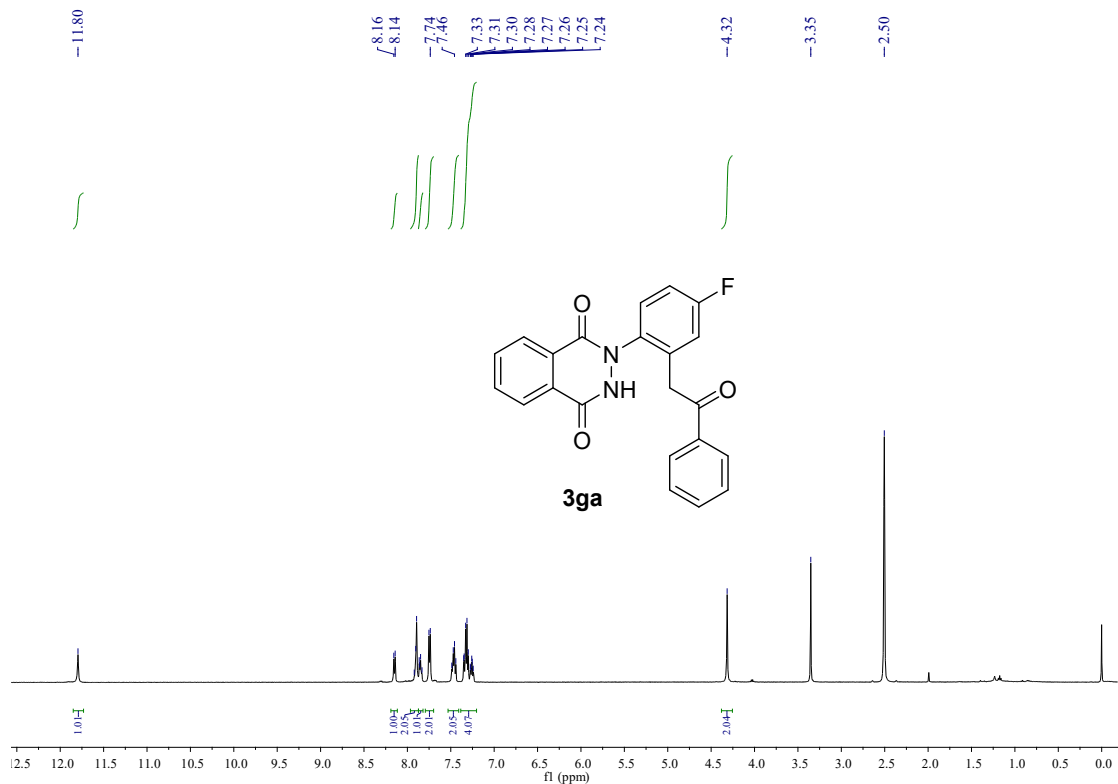

<sup>13</sup>C NMR, 125 MHz, DMSO-d<sub>6</sub>

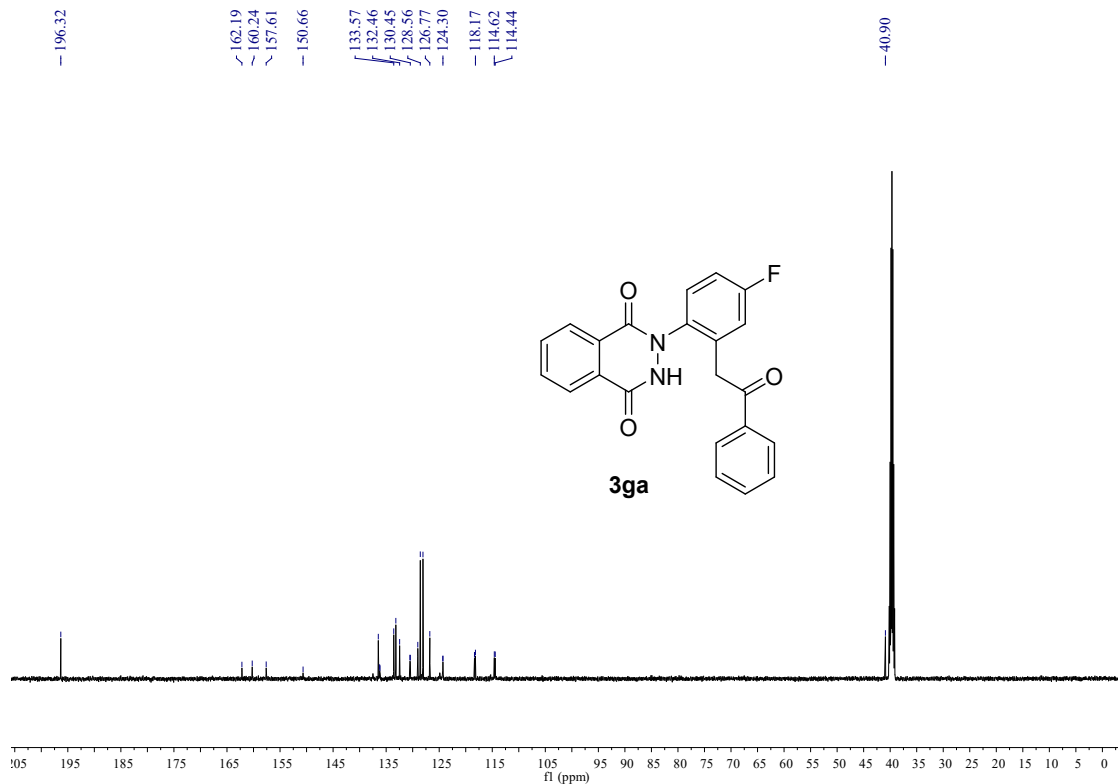

<sup>1</sup>H NMR, 500 MHz, DMSO-d<sub>6</sub>

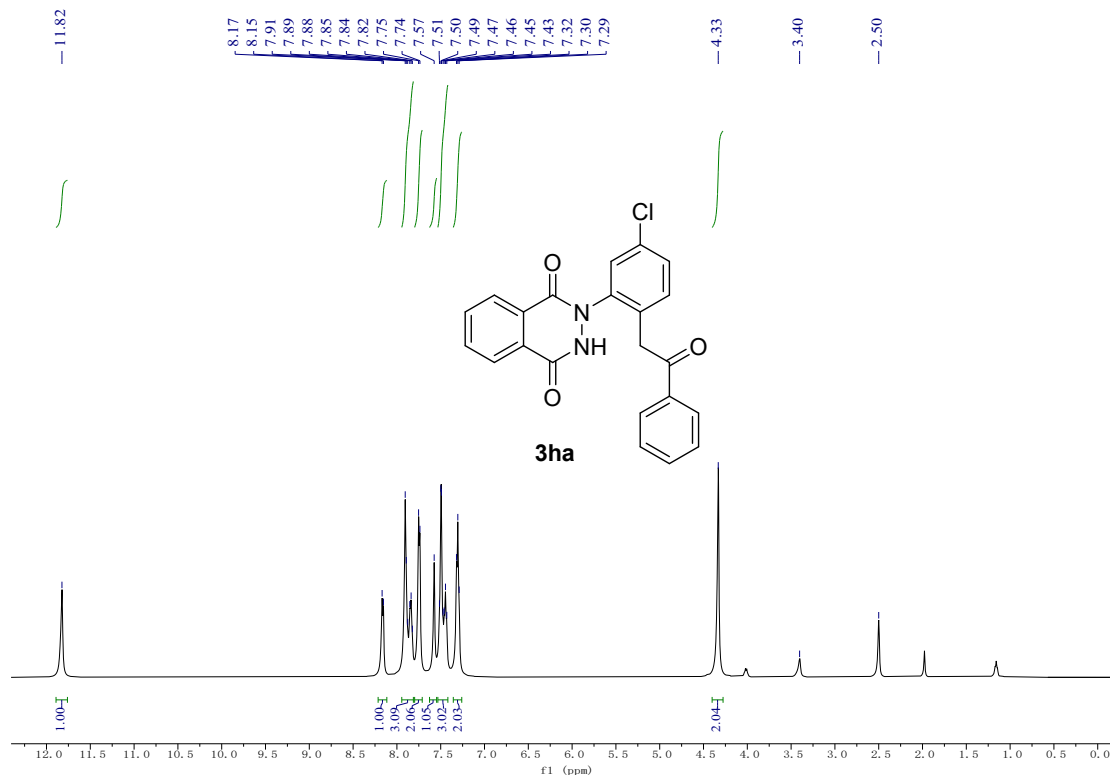

<sup>13</sup>C NMR, 125 MHz, DMSO-d<sub>6</sub>

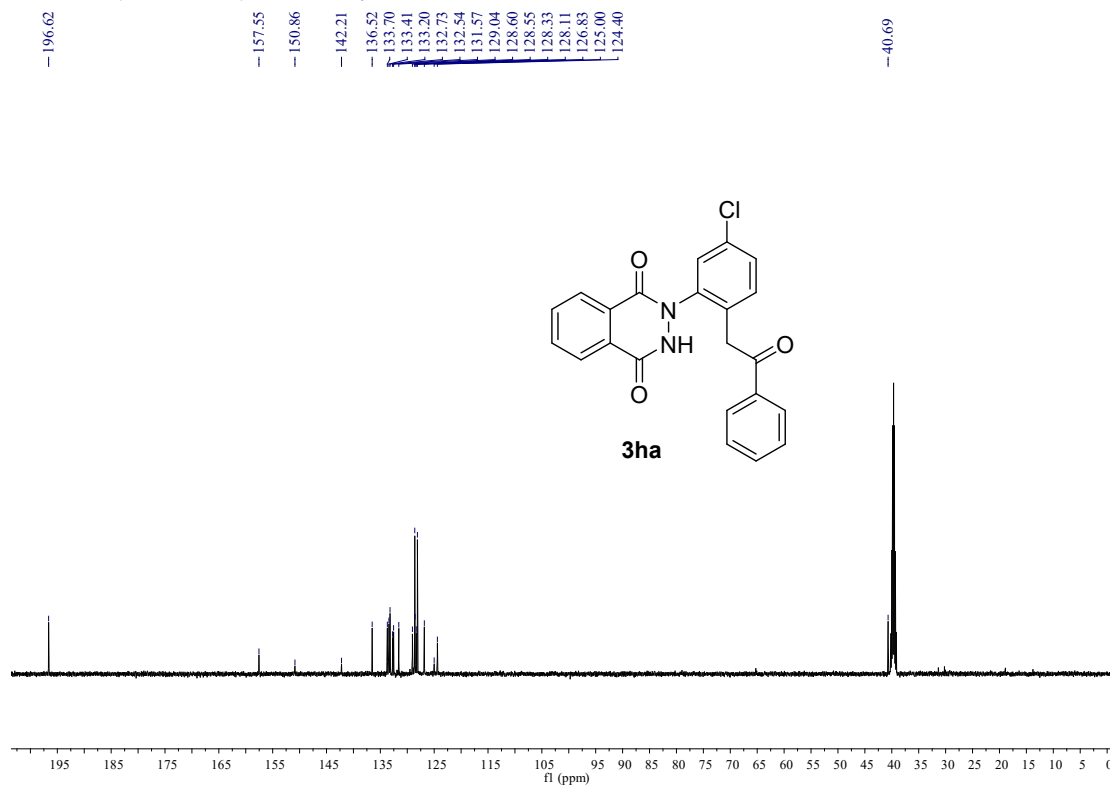

<sup>1</sup>H NMR, 500 MHz, DMSO-d<sub>6</sub>

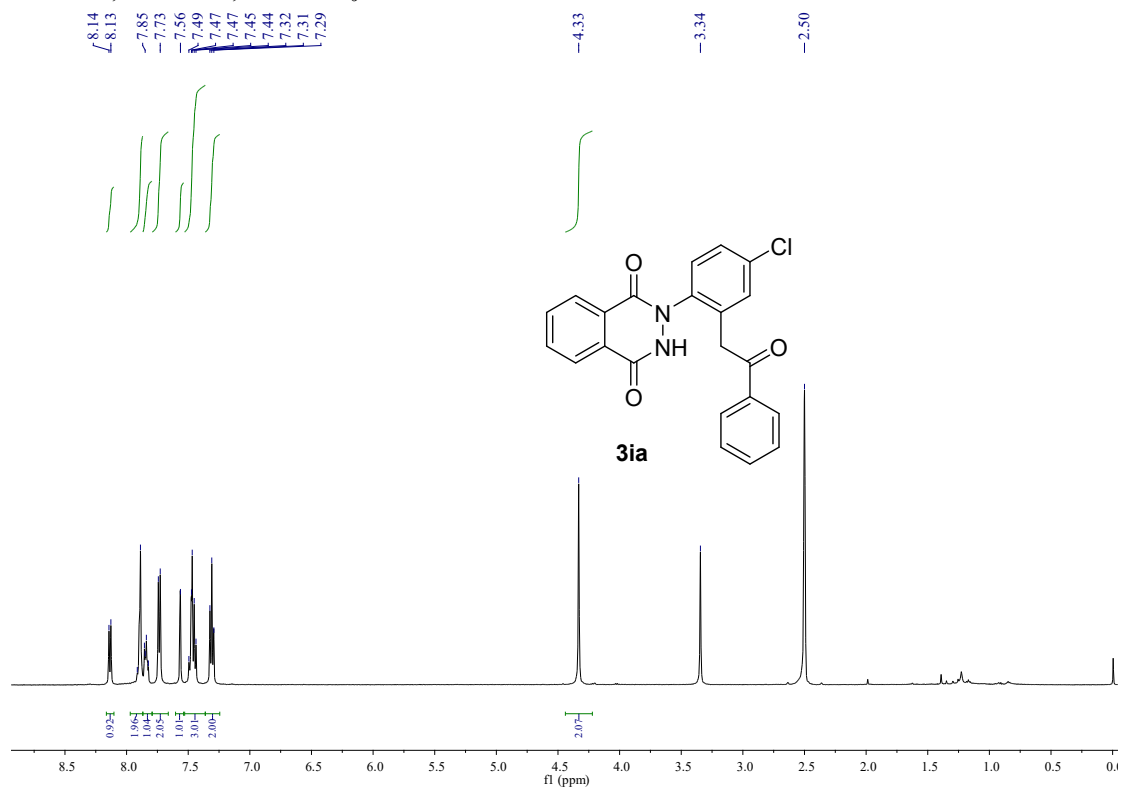

<sup>13</sup>C NMR, 125 MHz, DMSO-d<sub>6</sub>

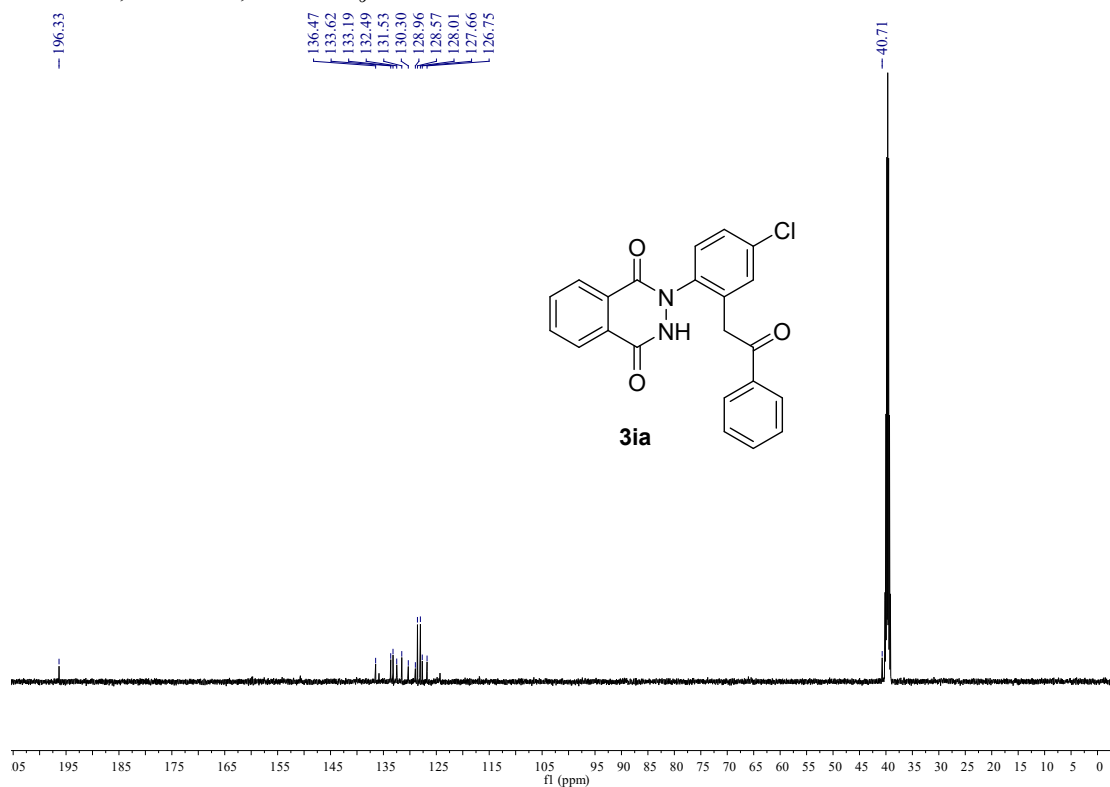

$^1\text{H}$  NMR, 500 MHz,  $\text{DMSO-}d_6$

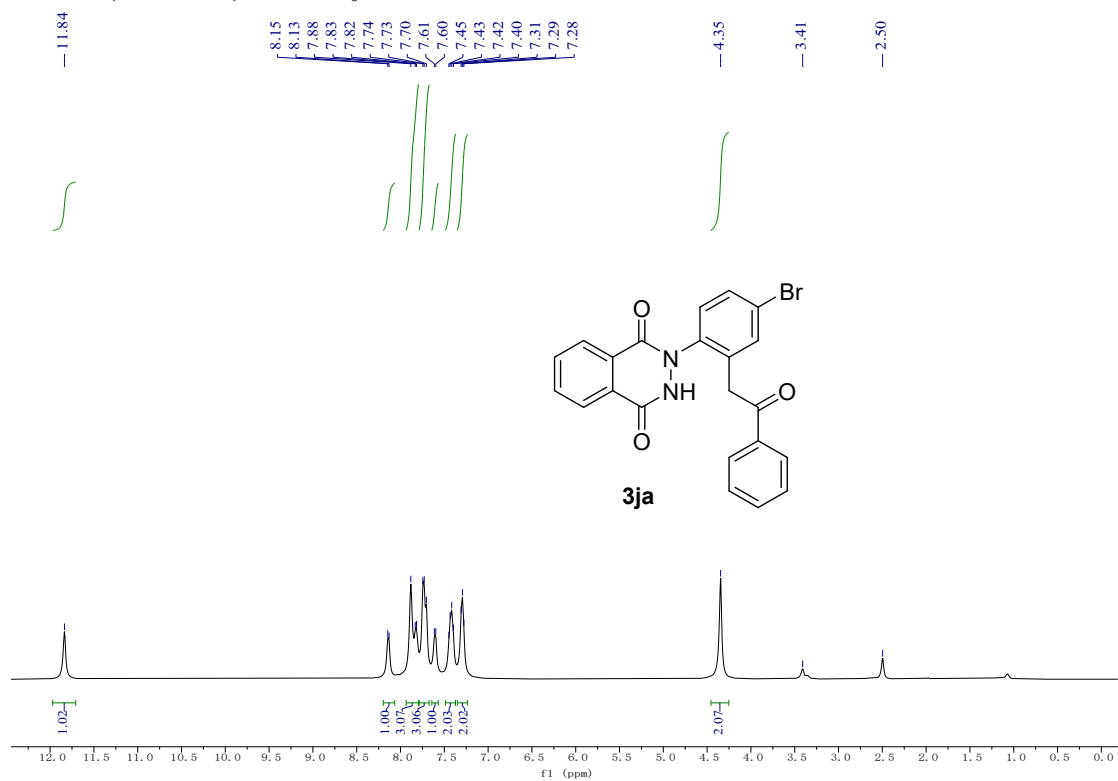

$^{13}\text{C}$  NMR, 125 MHz,  $\text{DMSO-}d_6$

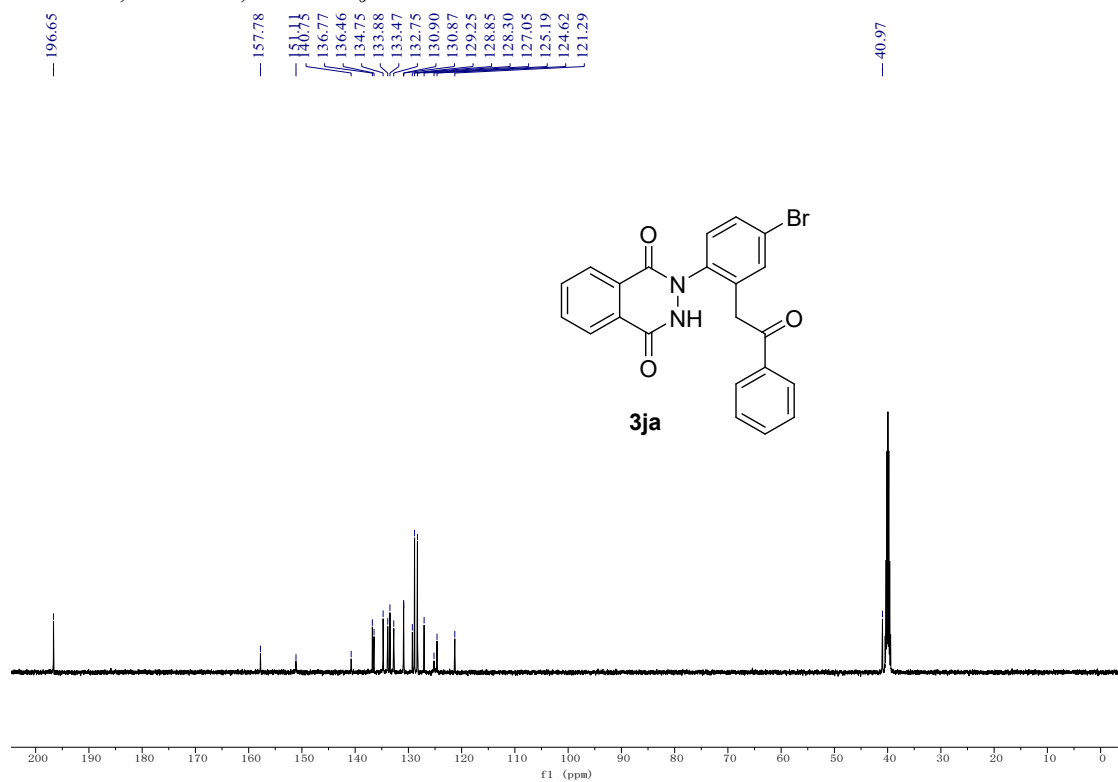

<sup>1</sup>H NMR, 500 MHz, DMSO-d<sub>6</sub>

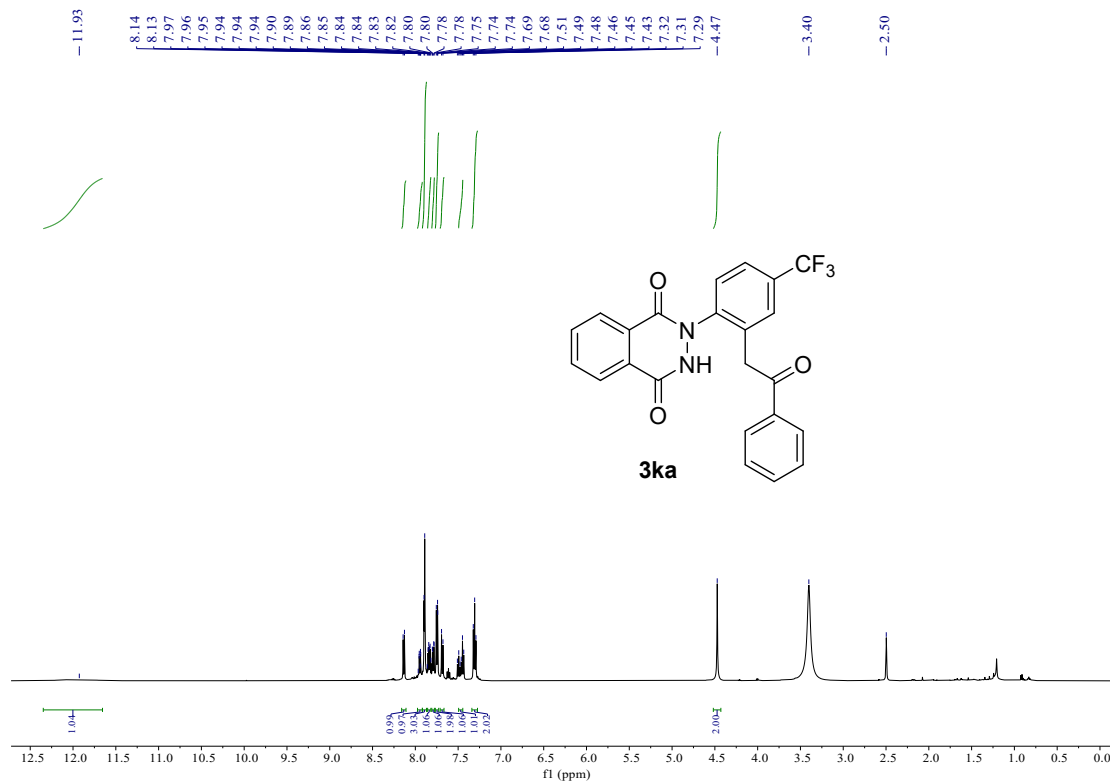

<sup>13</sup>C NMR, 125 MHz, DMSO-d<sub>6</sub>

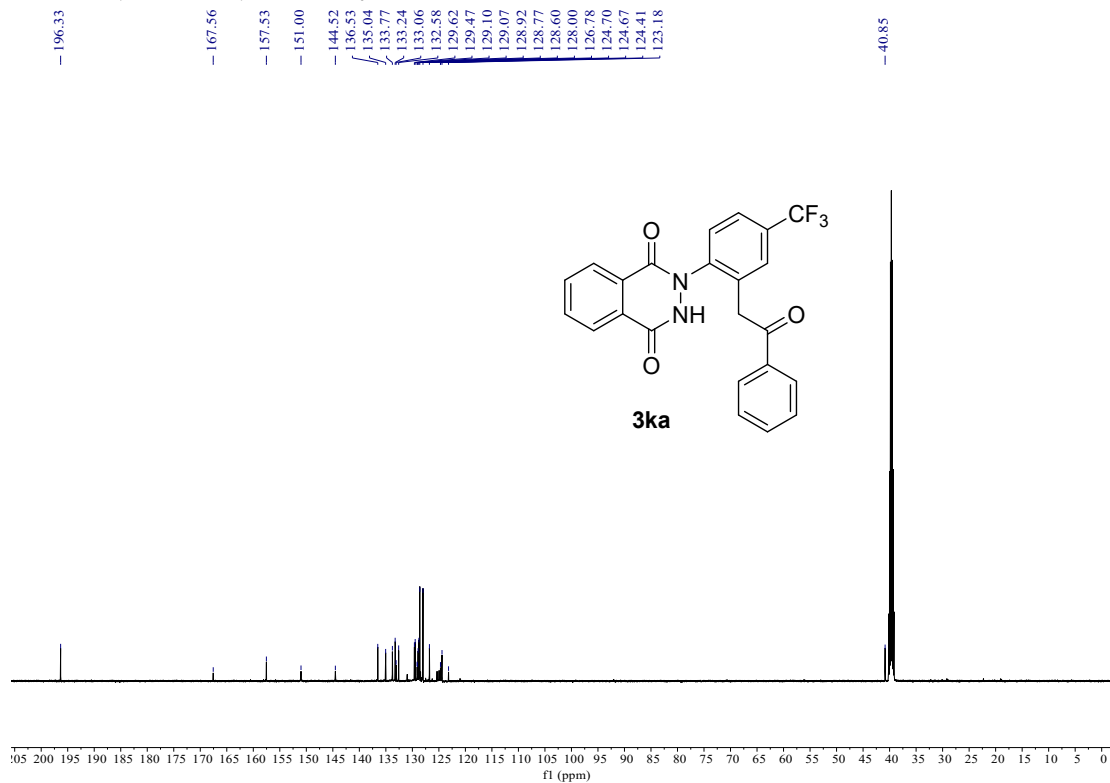

<sup>1</sup>H NMR, 500 MHz, DMSO-d<sub>6</sub>

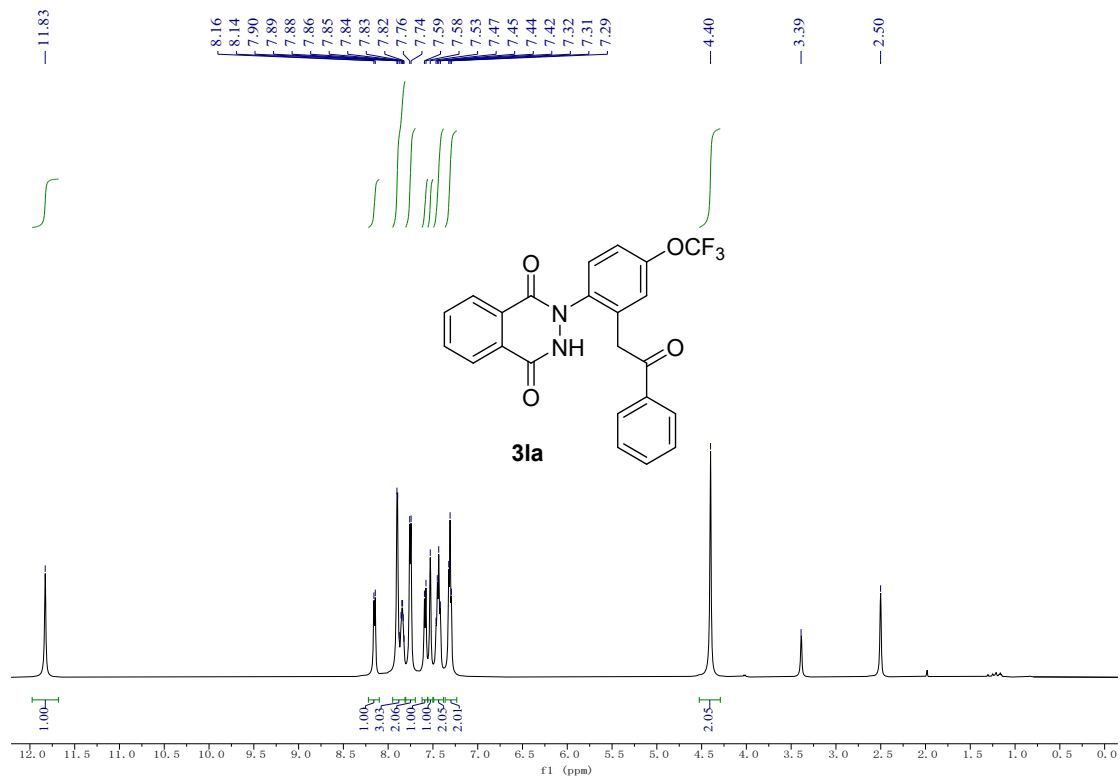

<sup>13</sup>C NMR, 125 MHz, DMSO-d<sub>6</sub>

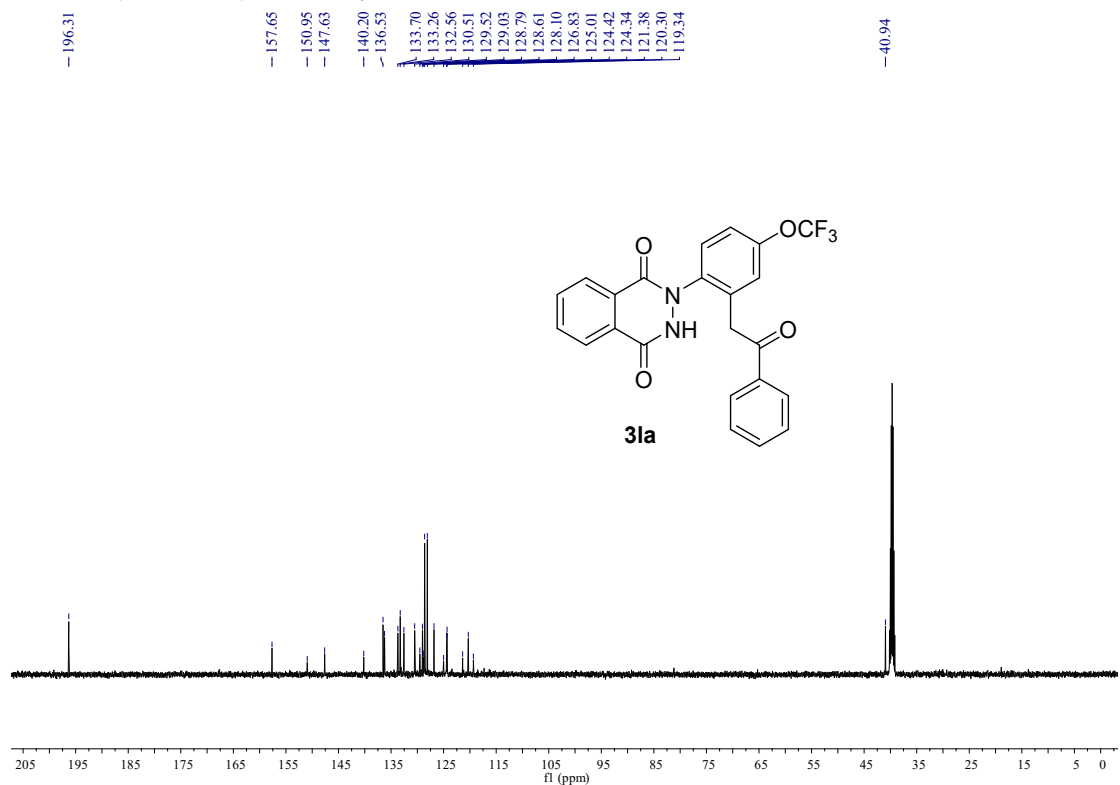

<sup>1</sup>H NMR, 500 MHz, DMSO-d<sub>6</sub>

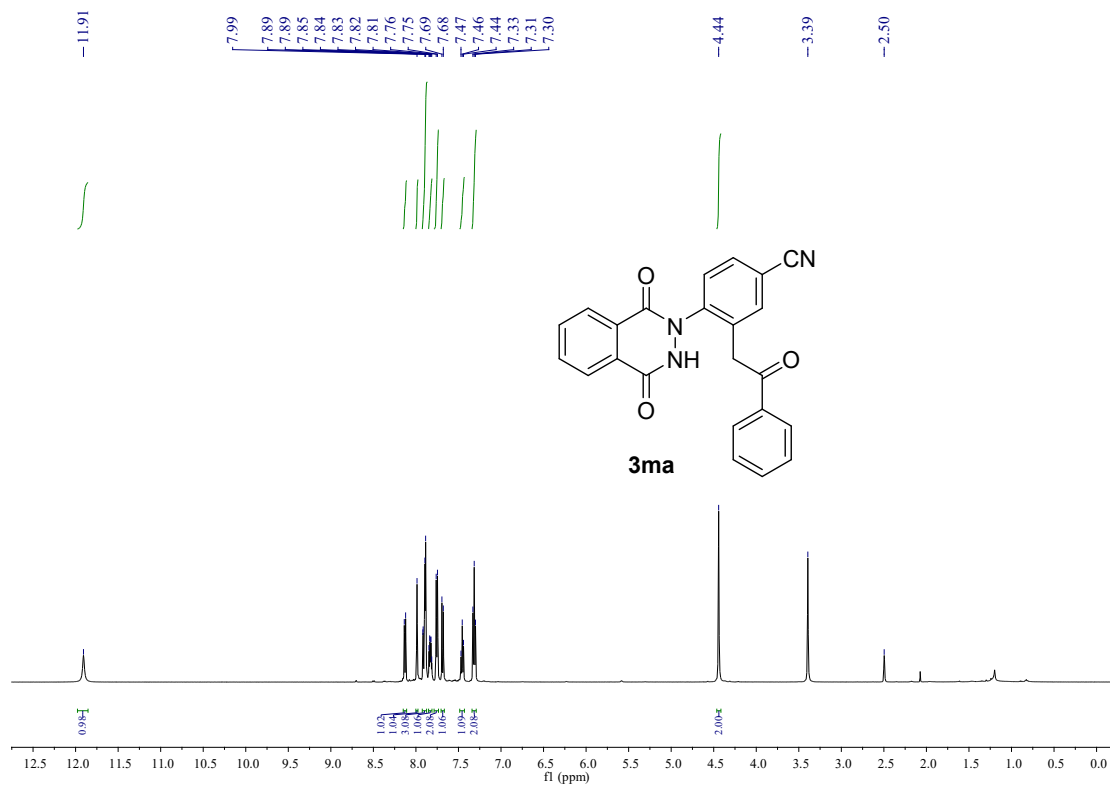

<sup>13</sup>C NMR, 125 MHz, DMSO-d<sub>6</sub>

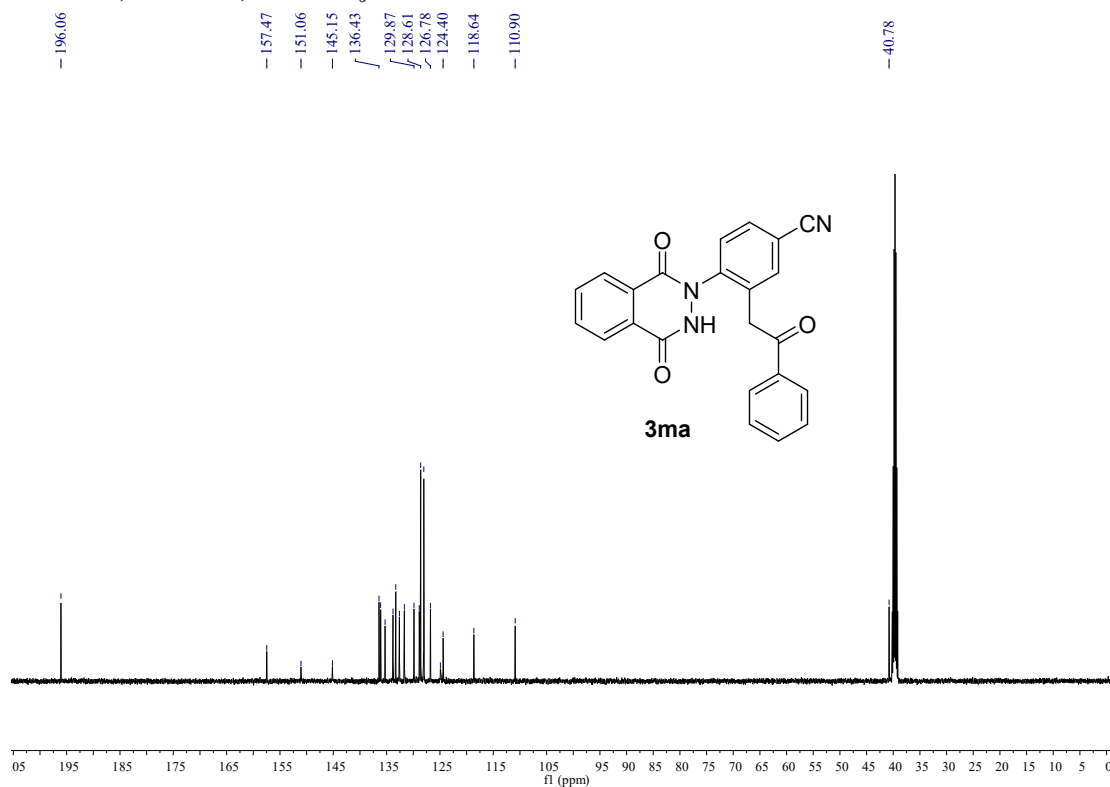





$^1\text{H}$  NMR, 500 MHz,  $\text{DMSO-}d_6$

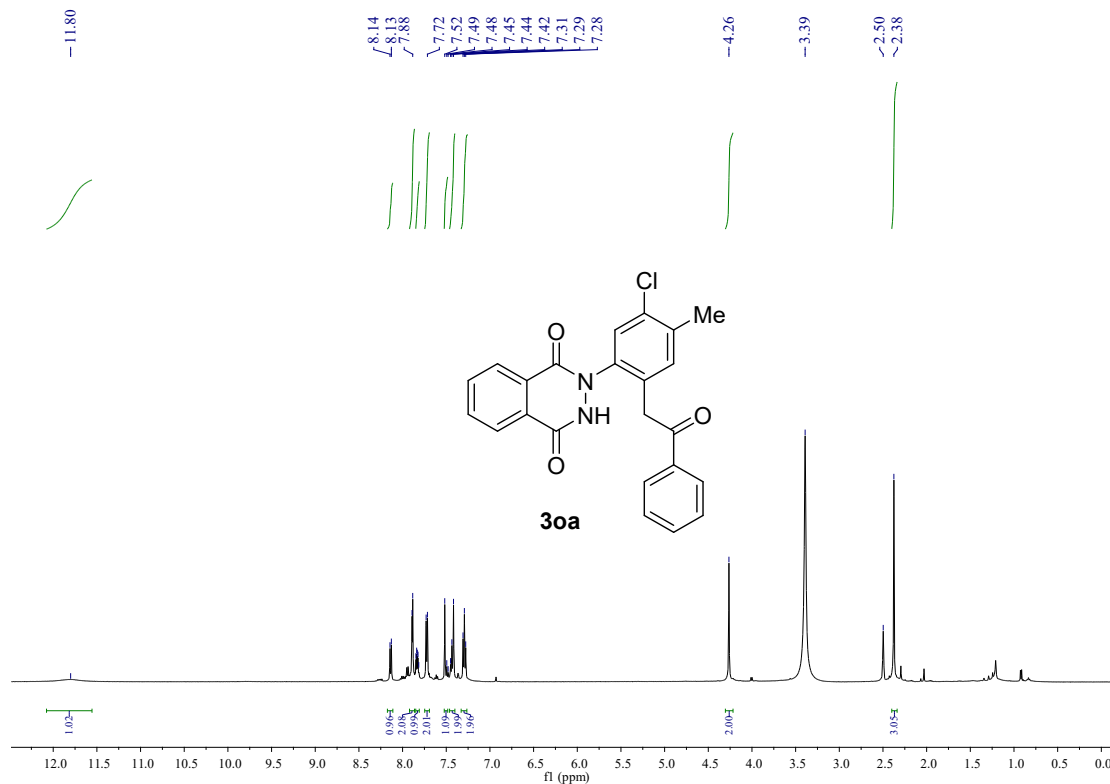

$^{13}\text{C}$  NMR, 125 MHz,  $\text{DMSO-}d_6$

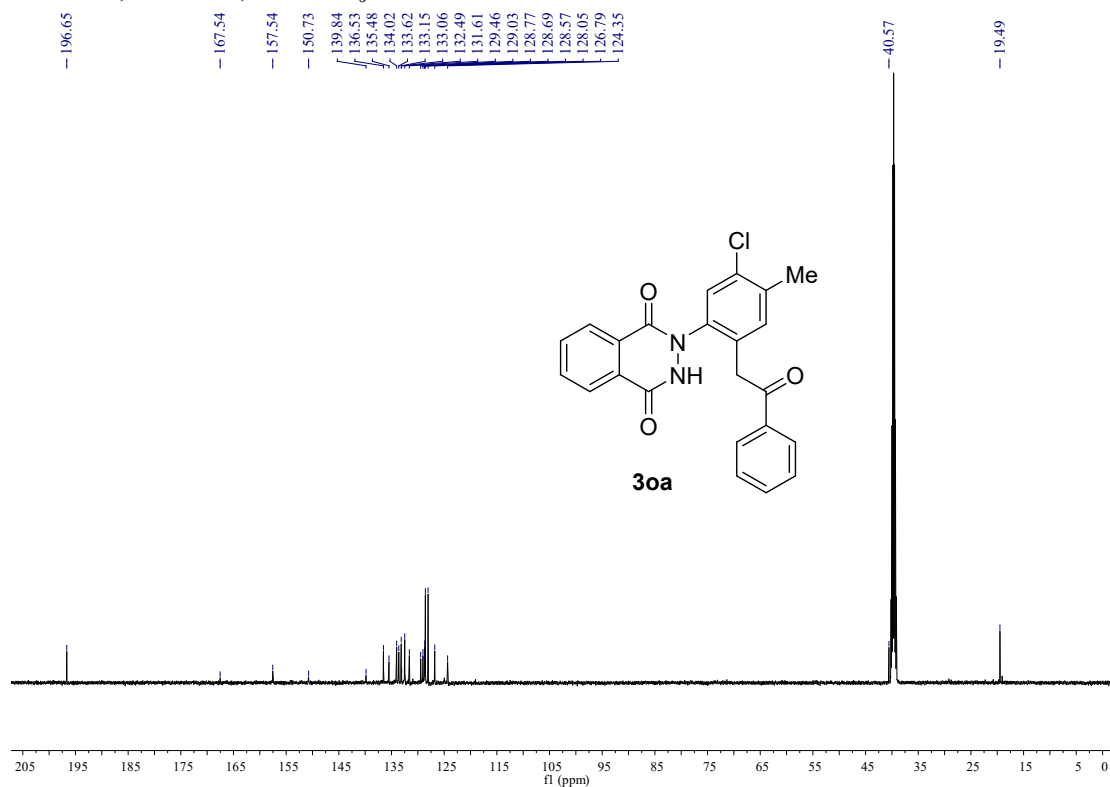

<sup>1</sup>H NMR, 500 MHz, DMSO-d<sub>6</sub>

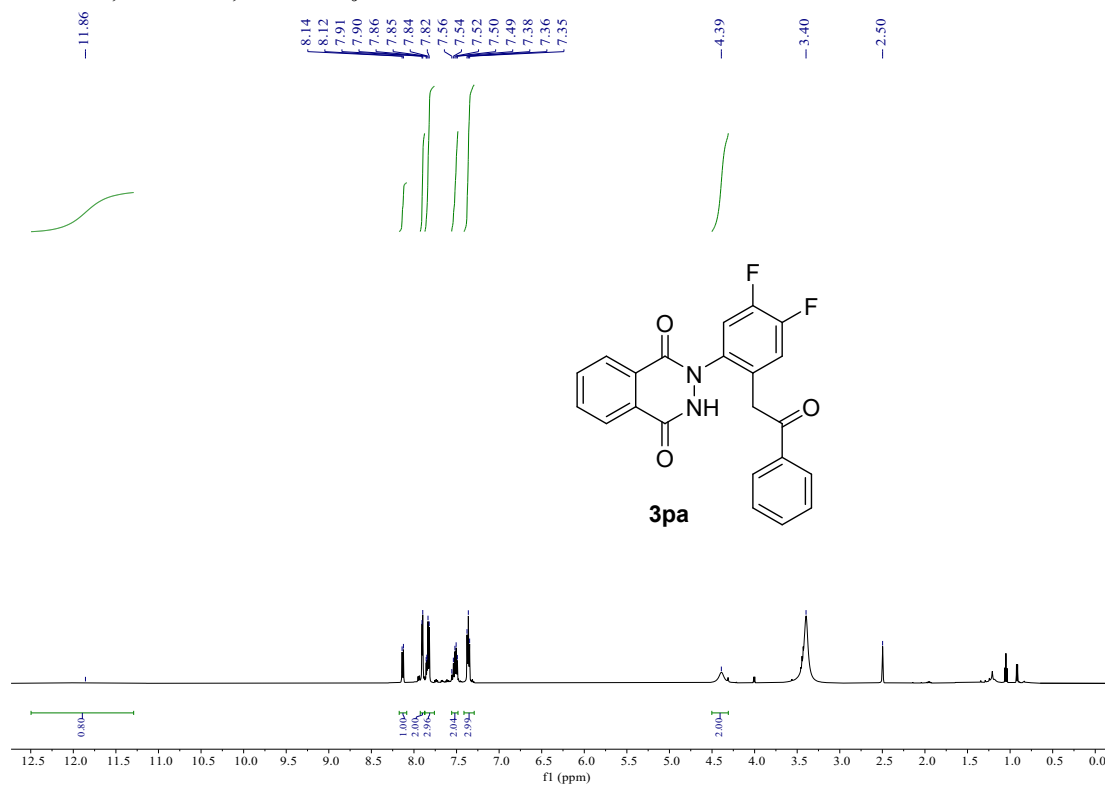

<sup>13</sup>C NMR, 125 MHz, DMSO-d<sub>6</sub>

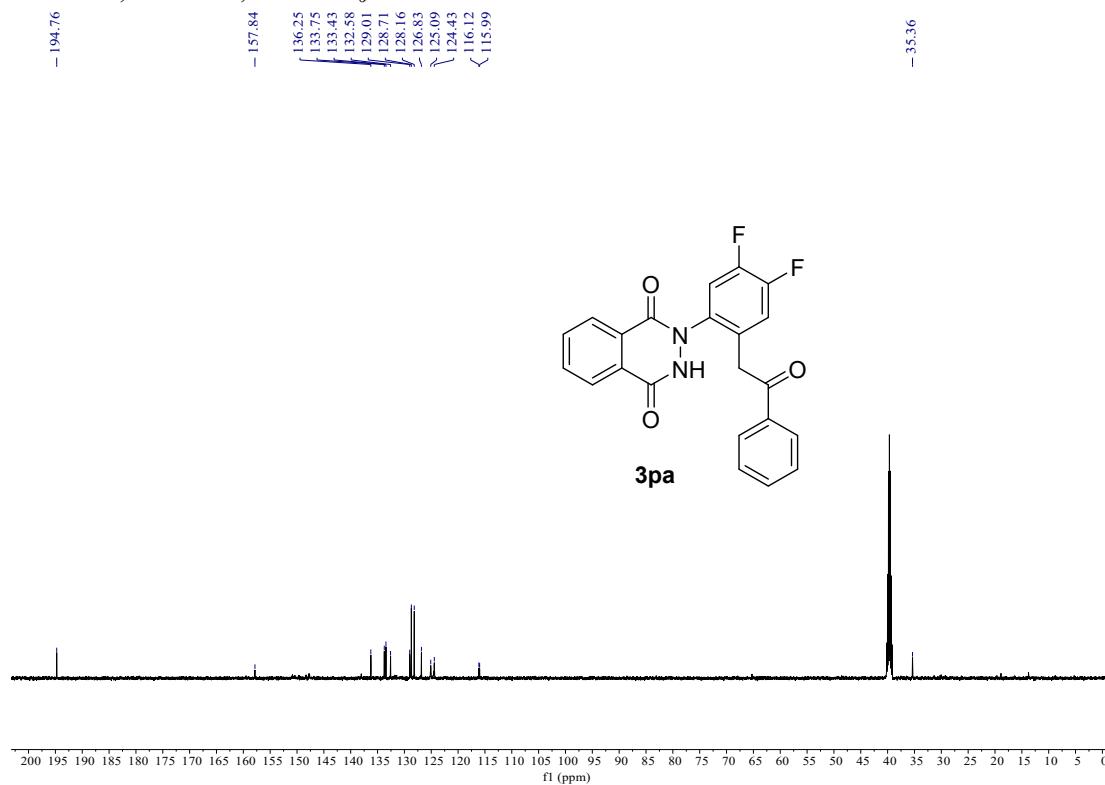

<sup>1</sup>H NMR, 500 MHz, DMSO-d<sub>6</sub>

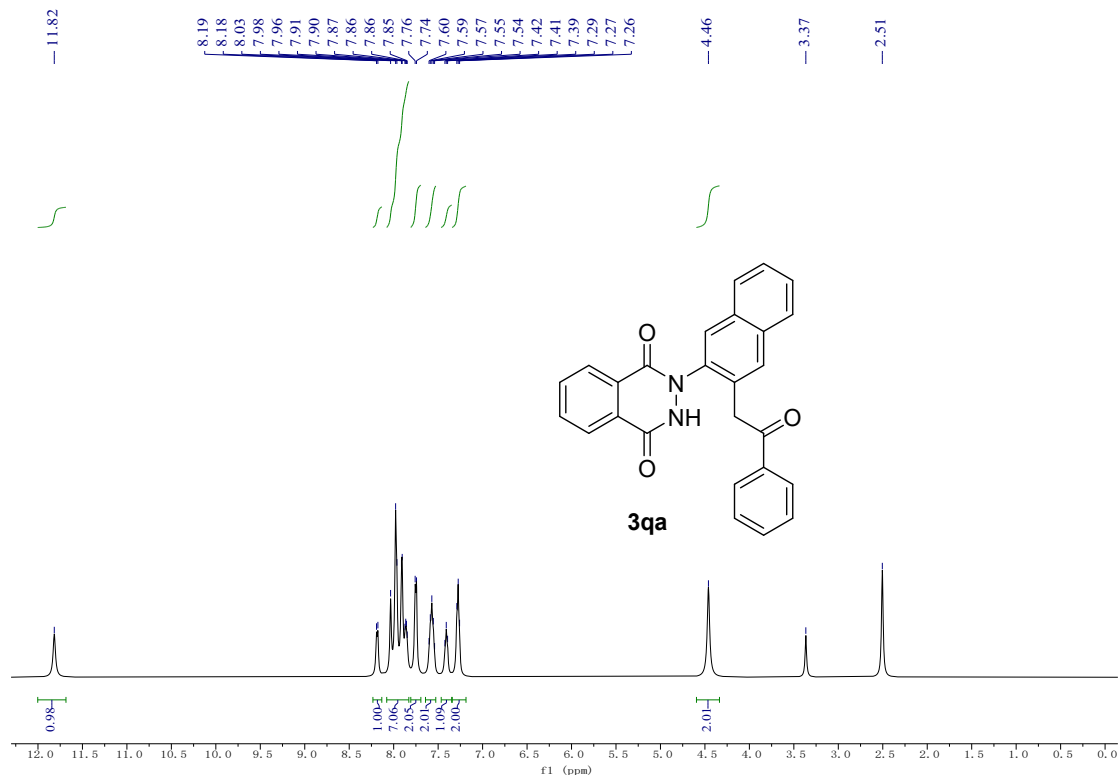

<sup>13</sup>C NMR, 125 MHz, DMSO-d<sub>6</sub>

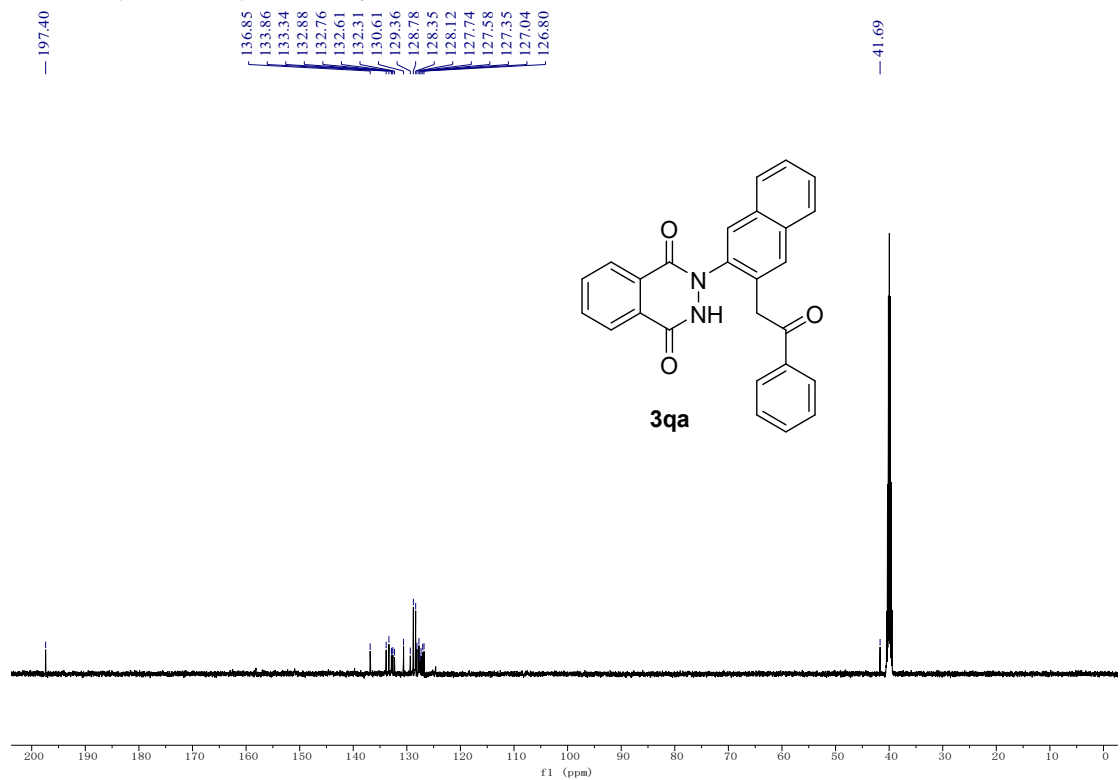

<sup>1</sup>H NMR, 500 MHz, DMSO-*d*<sub>6</sub>

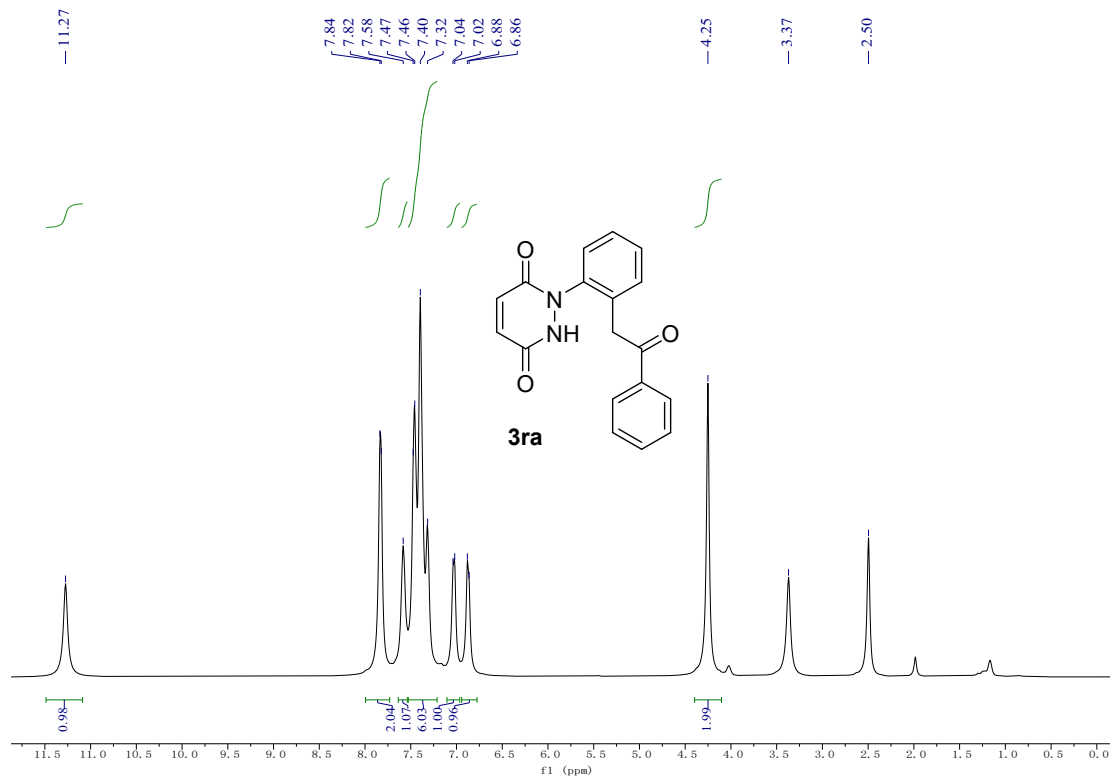

<sup>13</sup>C NMR, 125 MHz, DMSO-*d*<sub>6</sub>

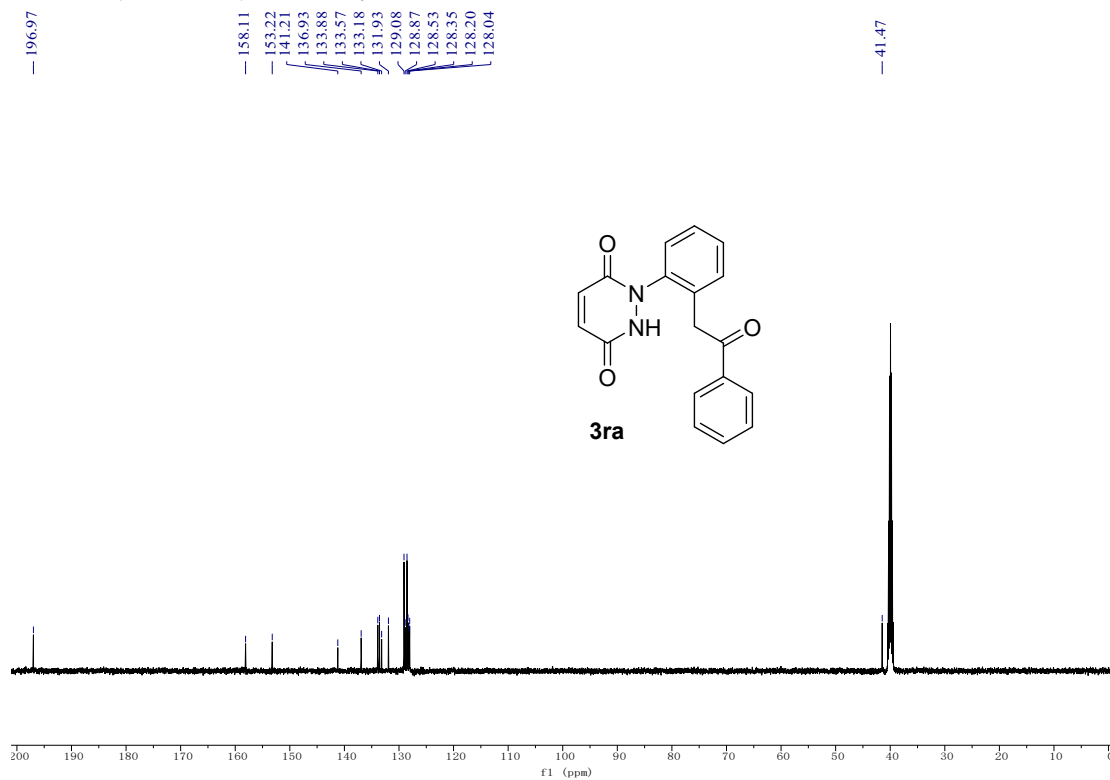

<sup>1</sup>H NMR, 500 MHz, DMSO-d<sub>6</sub>

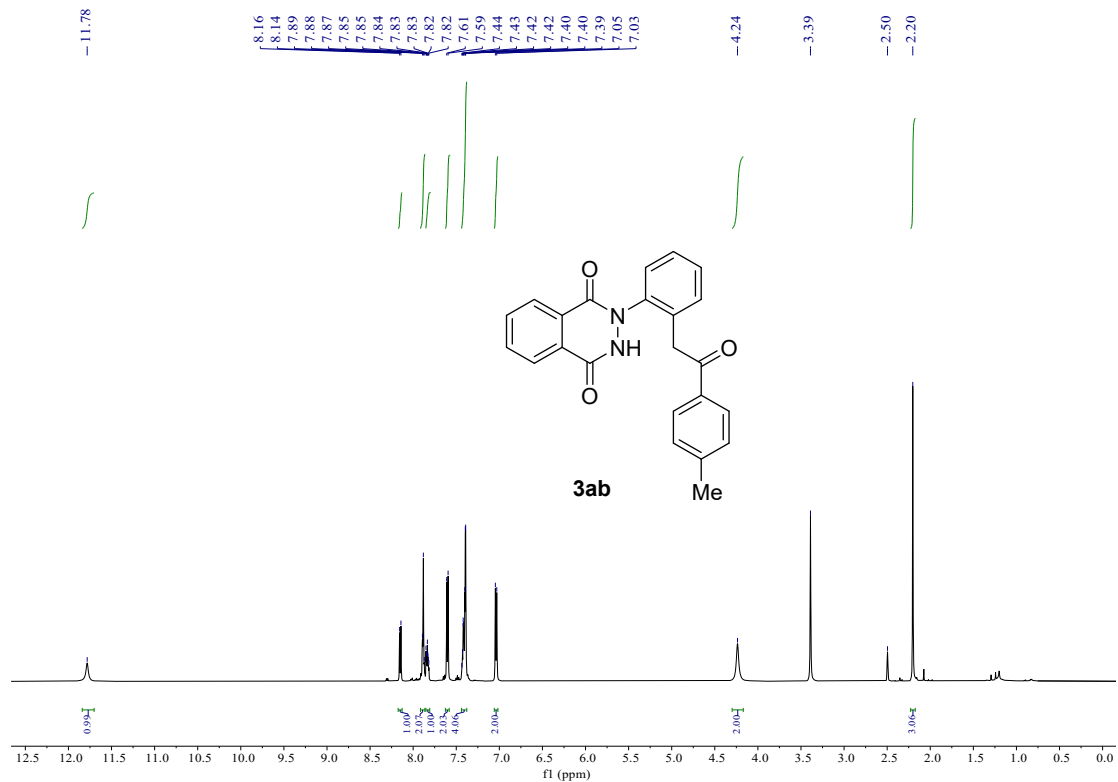

<sup>13</sup>C NMR, 125 MHz, DMSO-d<sub>6</sub>

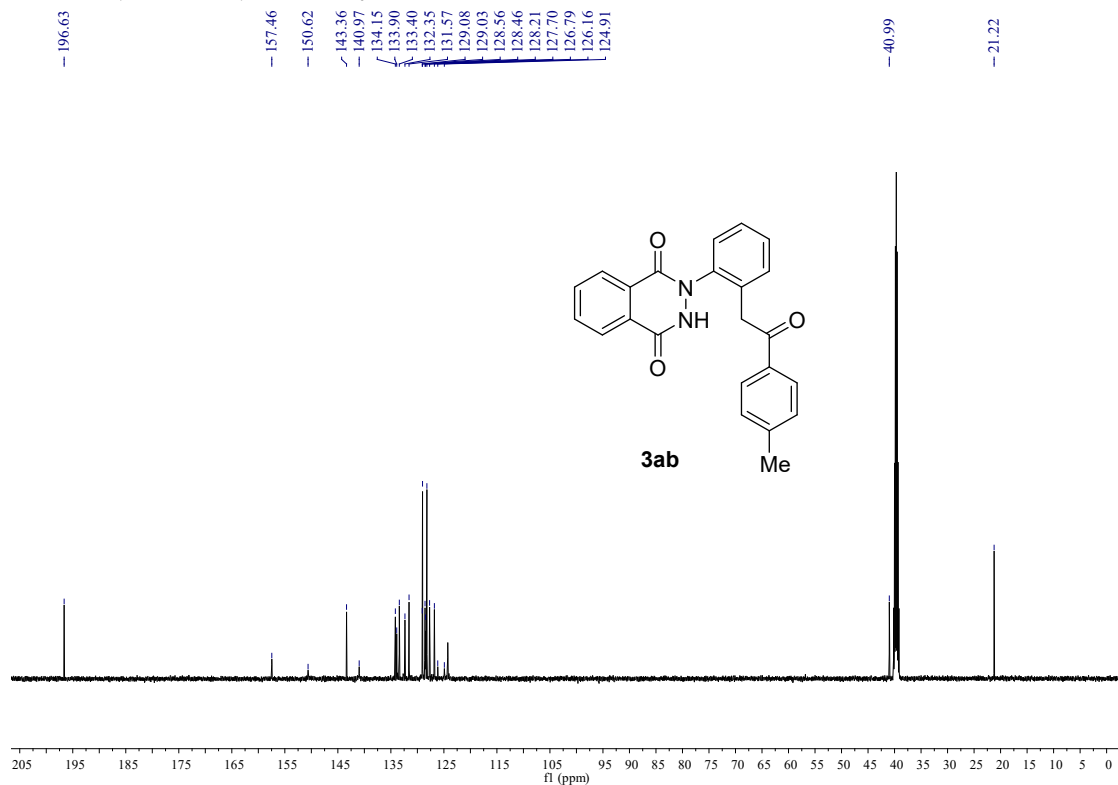

<sup>1</sup>H NMR, 500 MHz, DMSO-d<sub>6</sub>

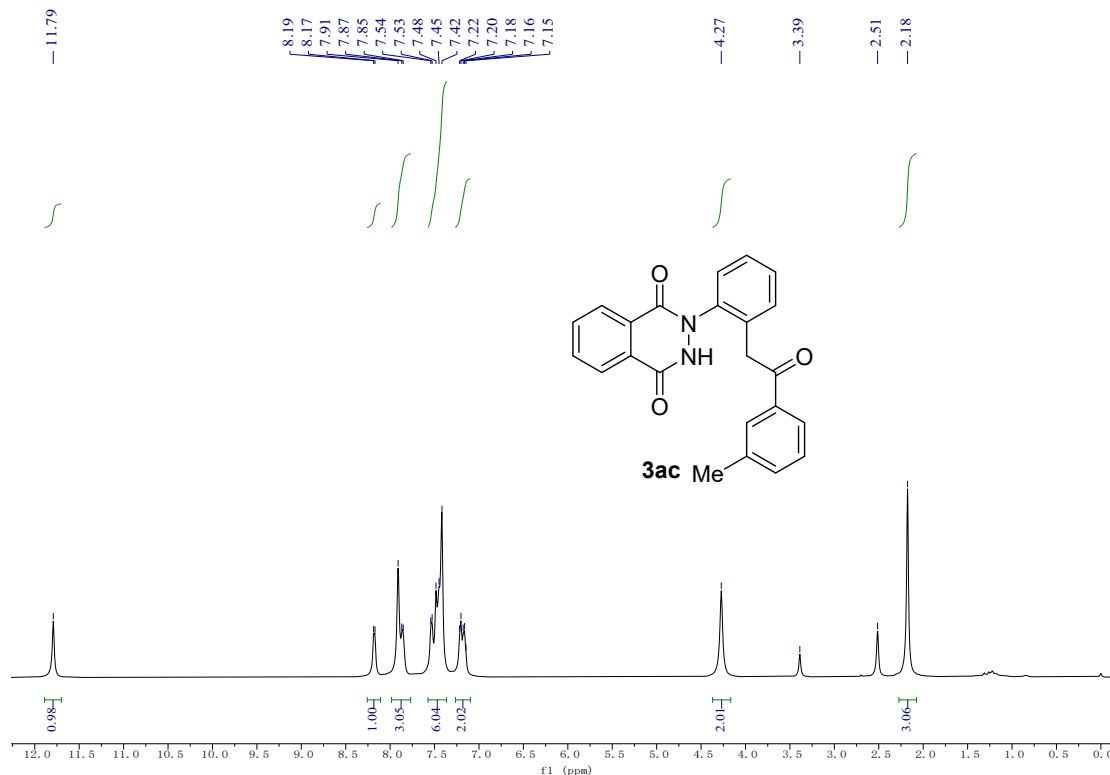

<sup>13</sup>C NMR, 125 MHz, DMSO-d<sub>6</sub>

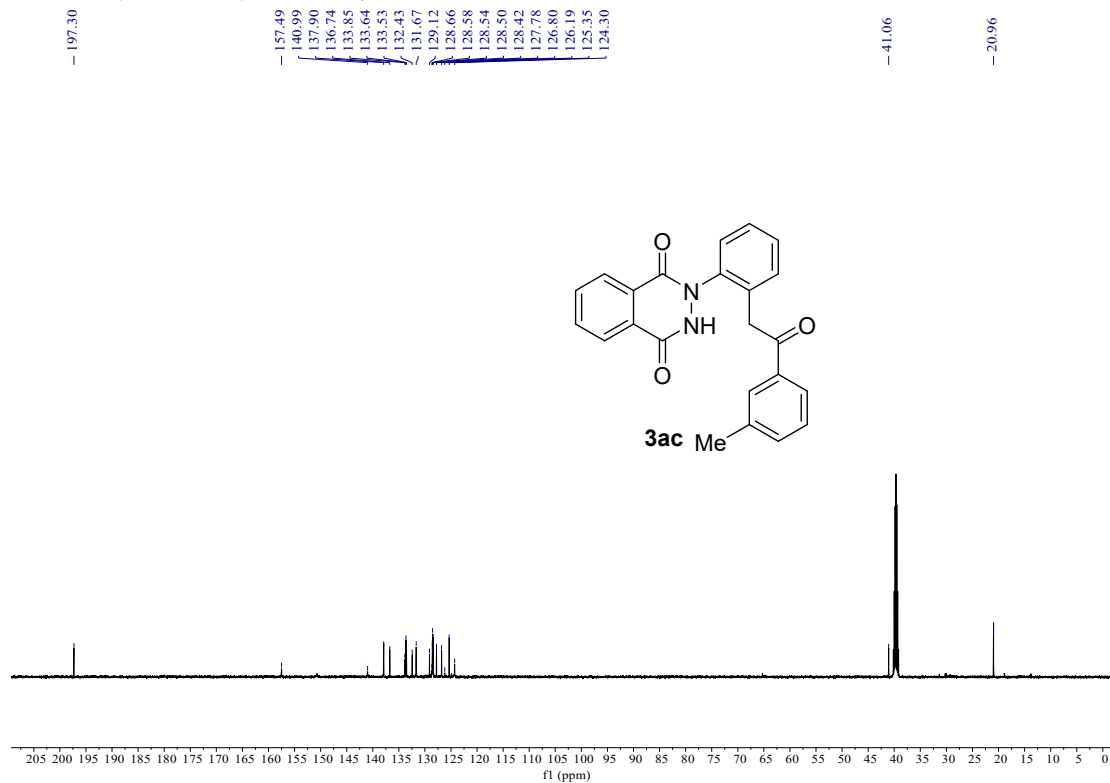

<sup>1</sup>H NMR, 500 MHz, DMSO-d<sub>6</sub>

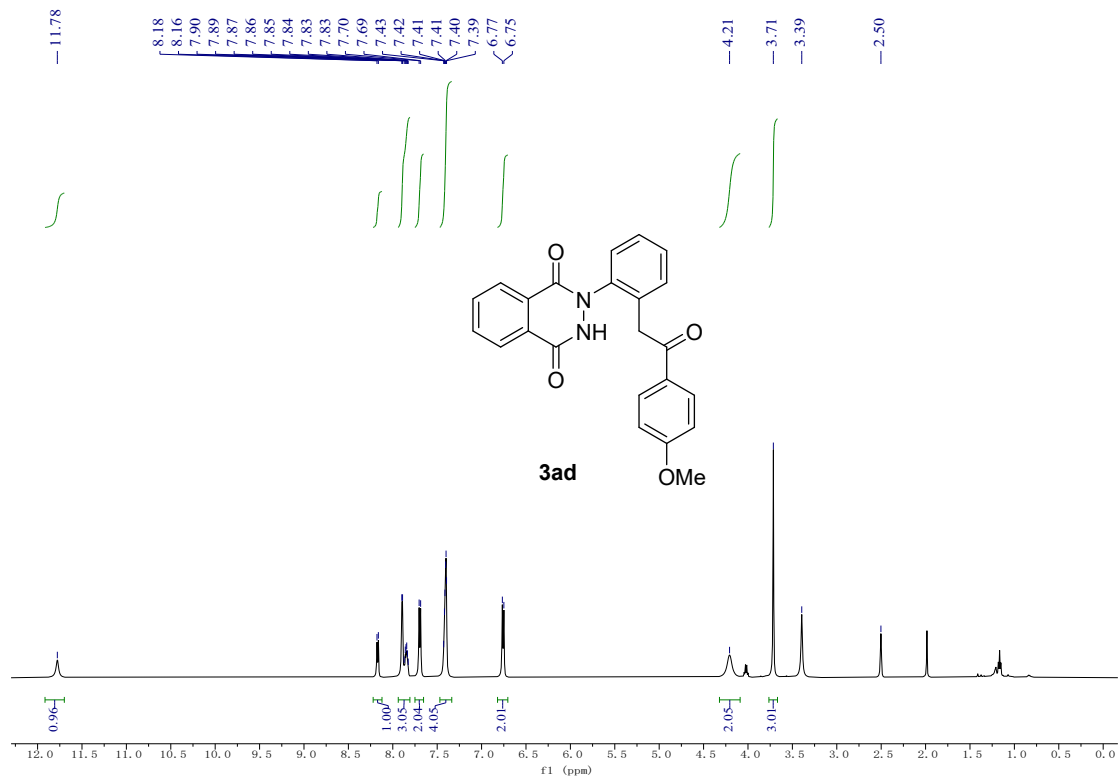

<sup>13</sup>C NMR, 125 MHz, DMSO-d<sub>6</sub>

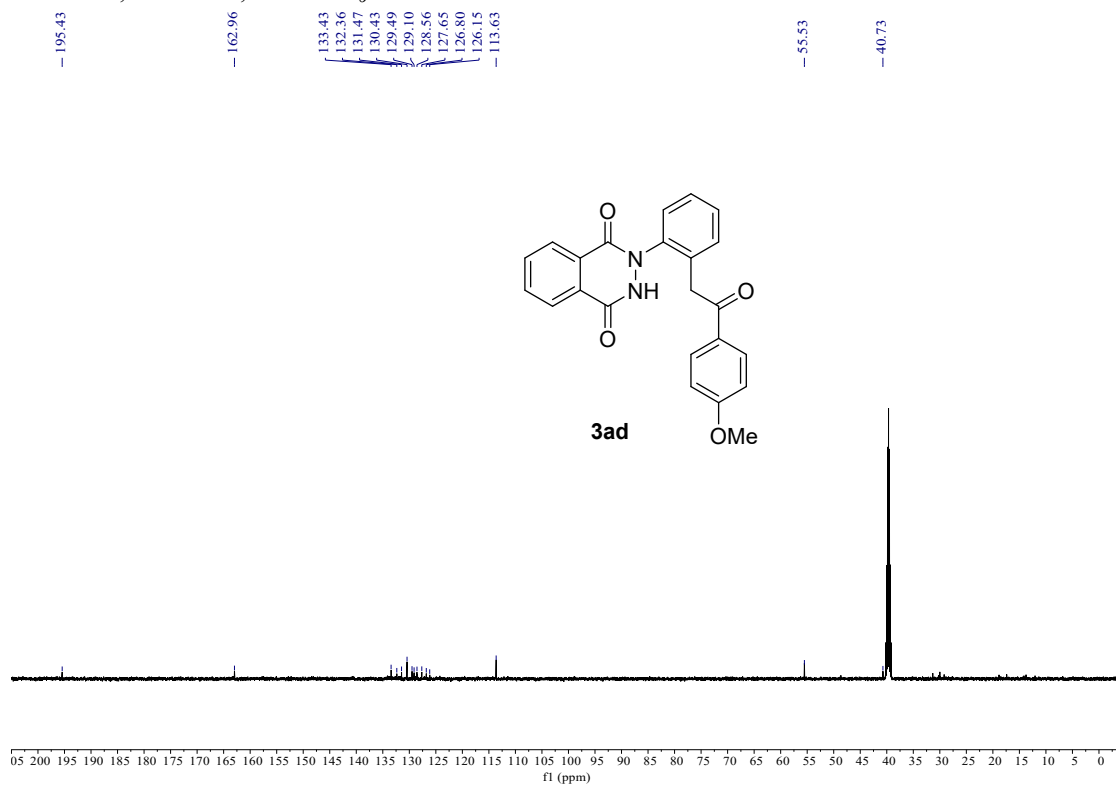



$^1\text{H}$  NMR, 500 MHz,  $\text{DMSO-}d_6$

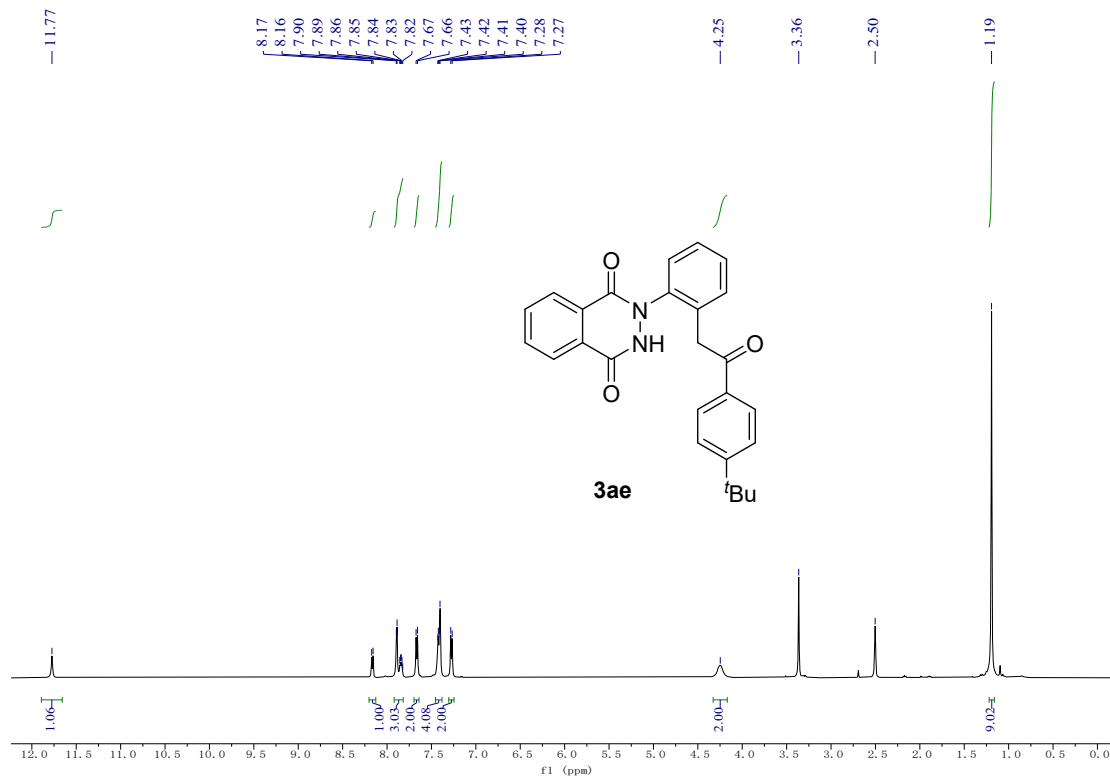

$^{13}\text{C}$  NMR, 125 MHz,  $\text{DMSO-}d_6$

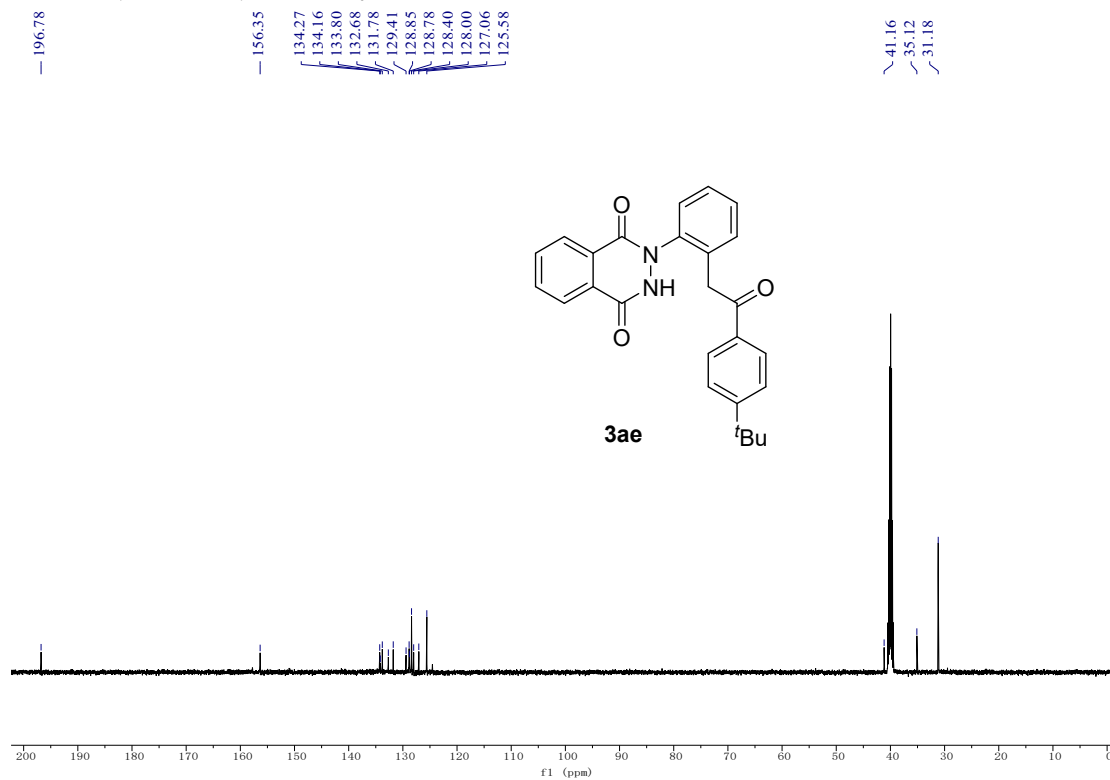

<sup>1</sup>H NMR, 500 MHz, DMSO-d<sub>6</sub>

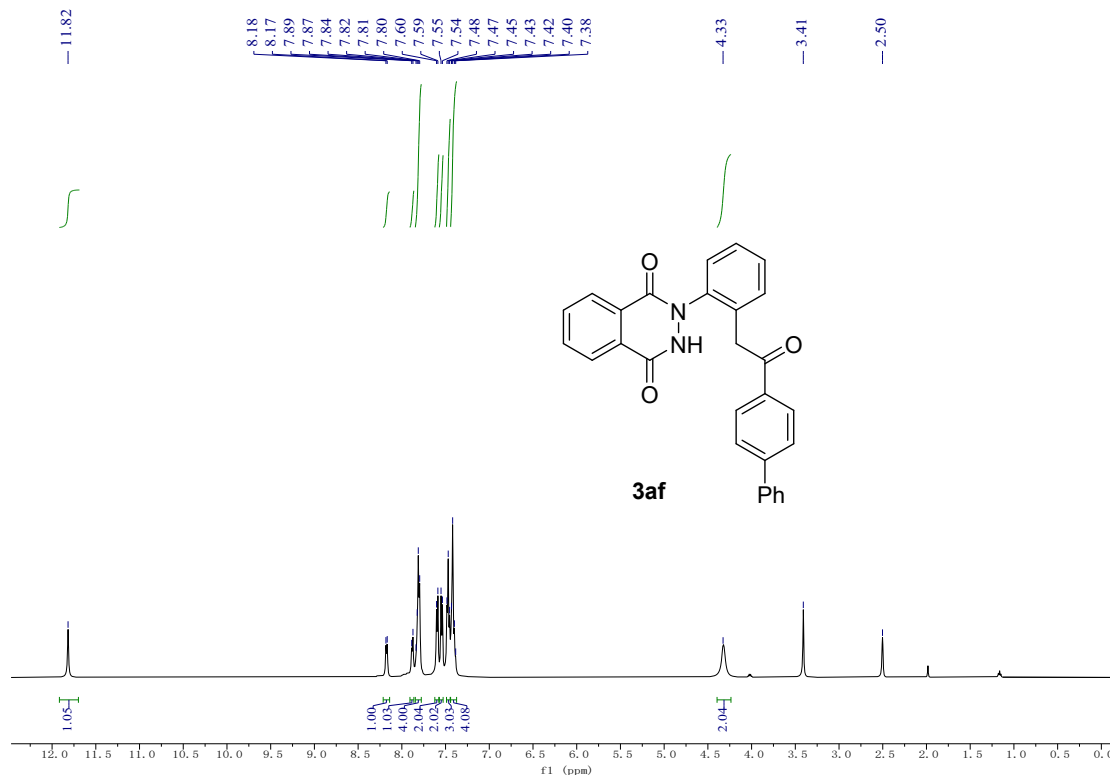

<sup>13</sup>C NMR, 125 MHz, DMSO-d<sub>6</sub>

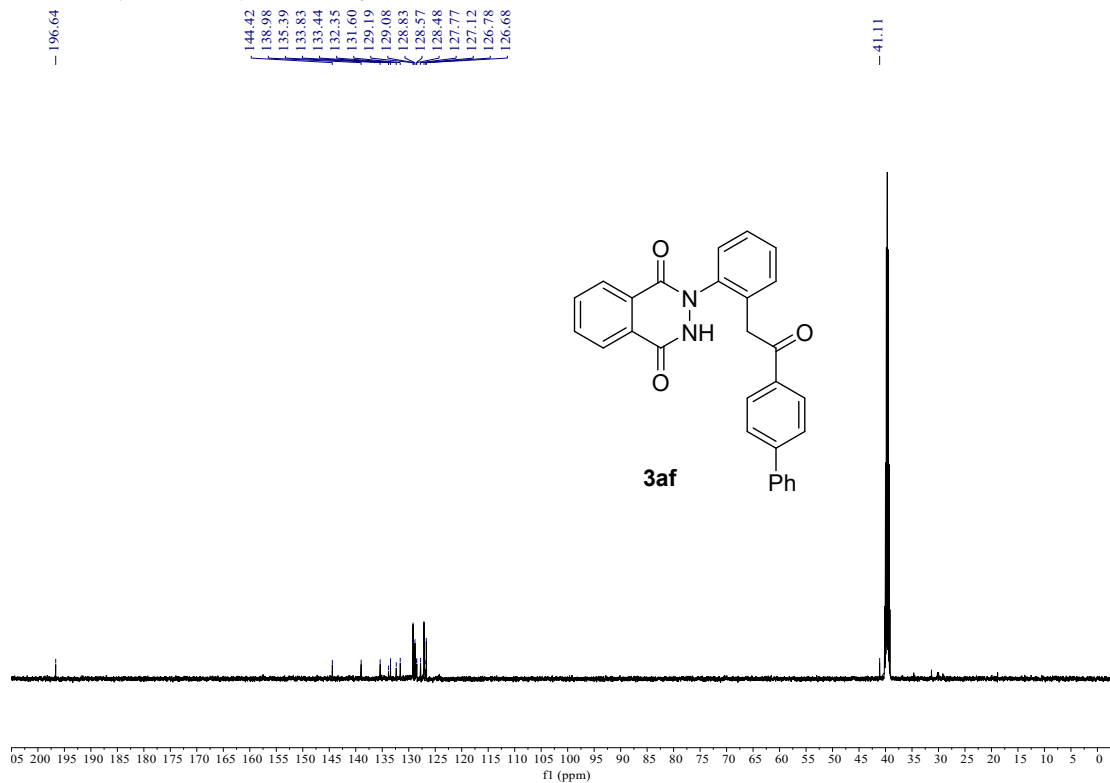

<sup>1</sup>H NMR, 500 MHz, DMSO-d<sub>6</sub>

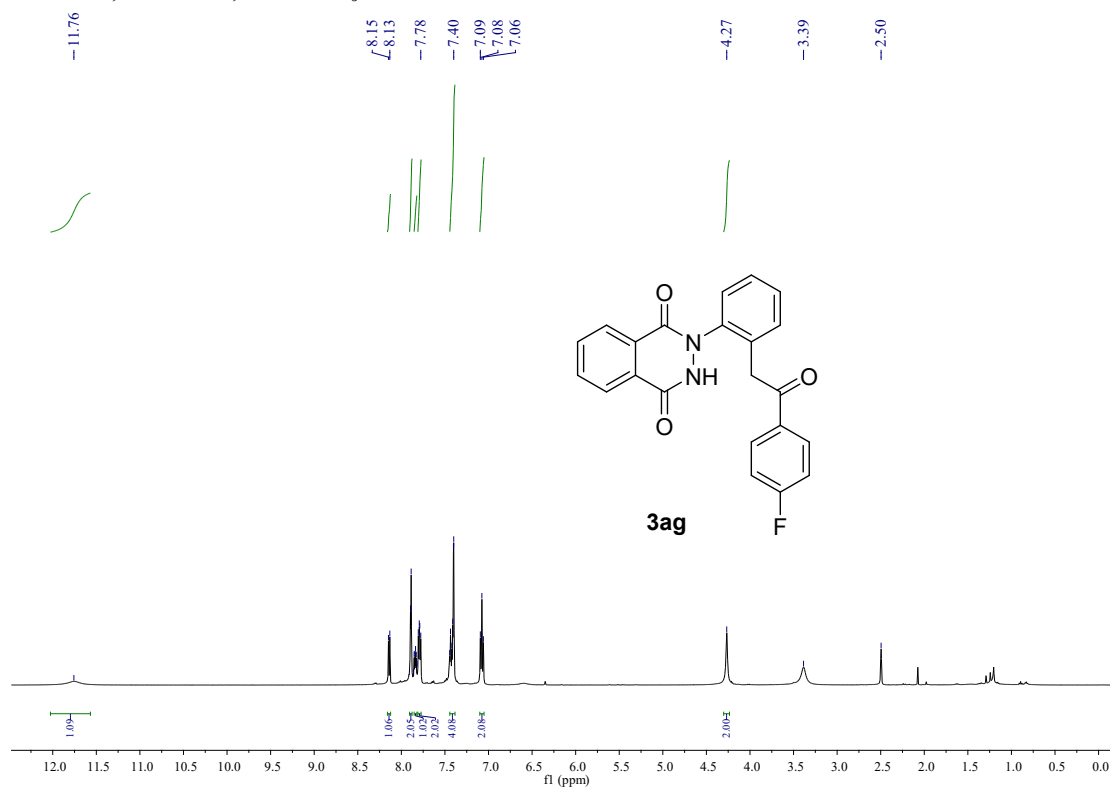

<sup>13</sup>C NMR, 125 MHz, DMSO-d<sub>6</sub>

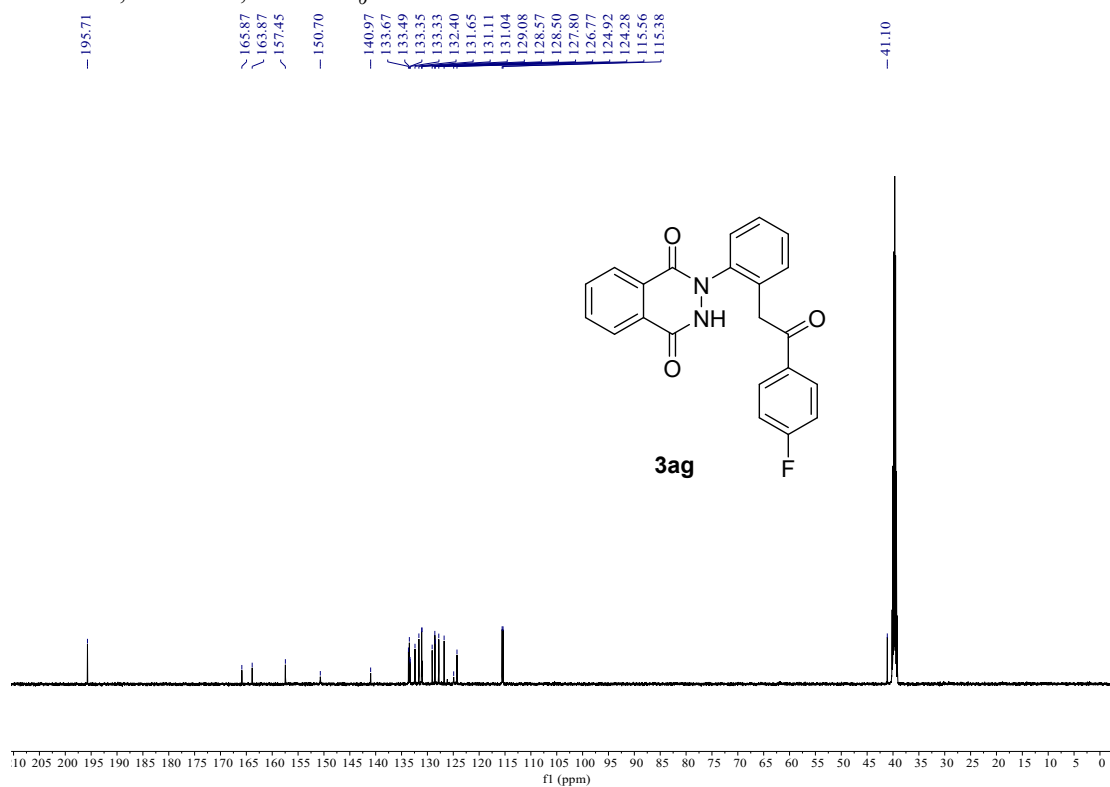

<sup>1</sup>H NMR, 500 MHz, DMSO-d<sub>6</sub>

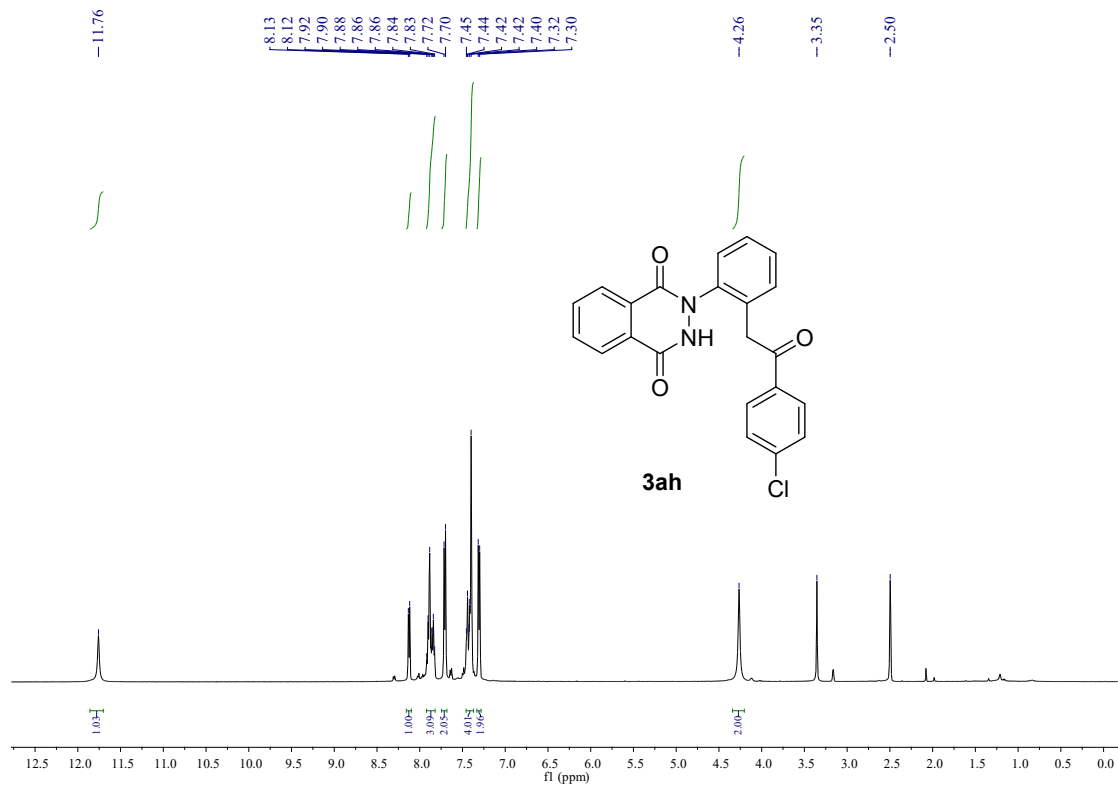

<sup>13</sup>C NMR, 125 MHz, DMSO-d<sub>6</sub>

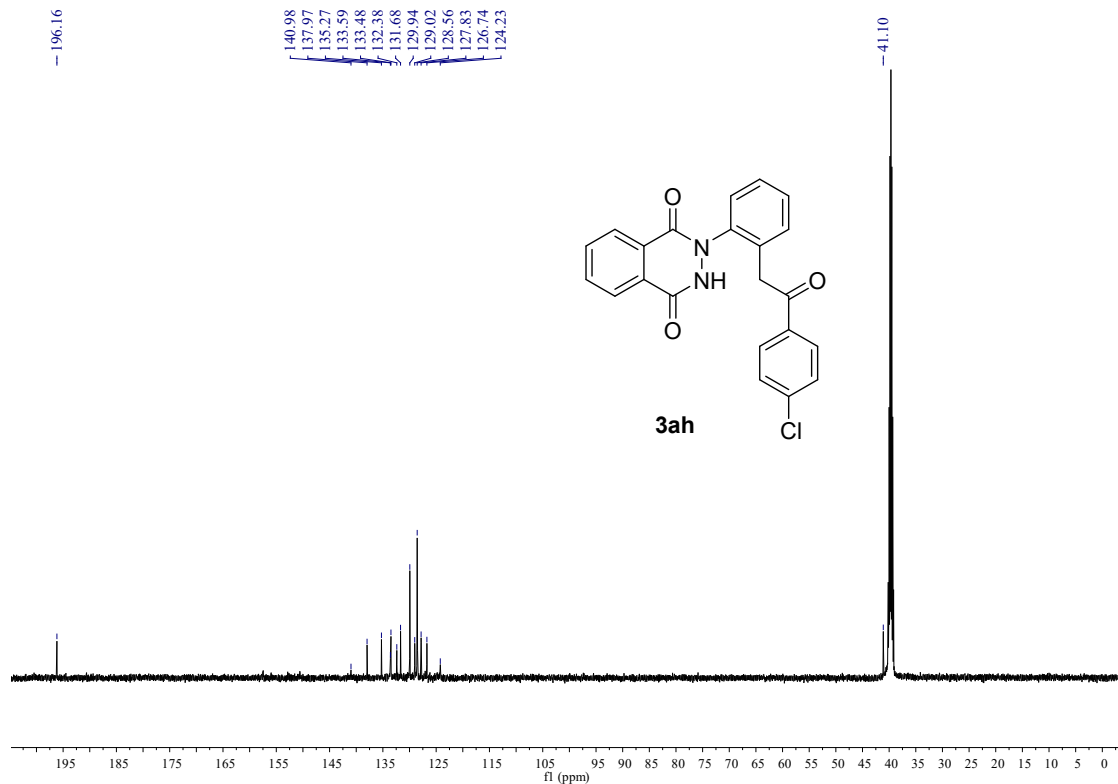

<sup>1</sup>H NMR, 500 MHz, DMSO-d<sub>6</sub>

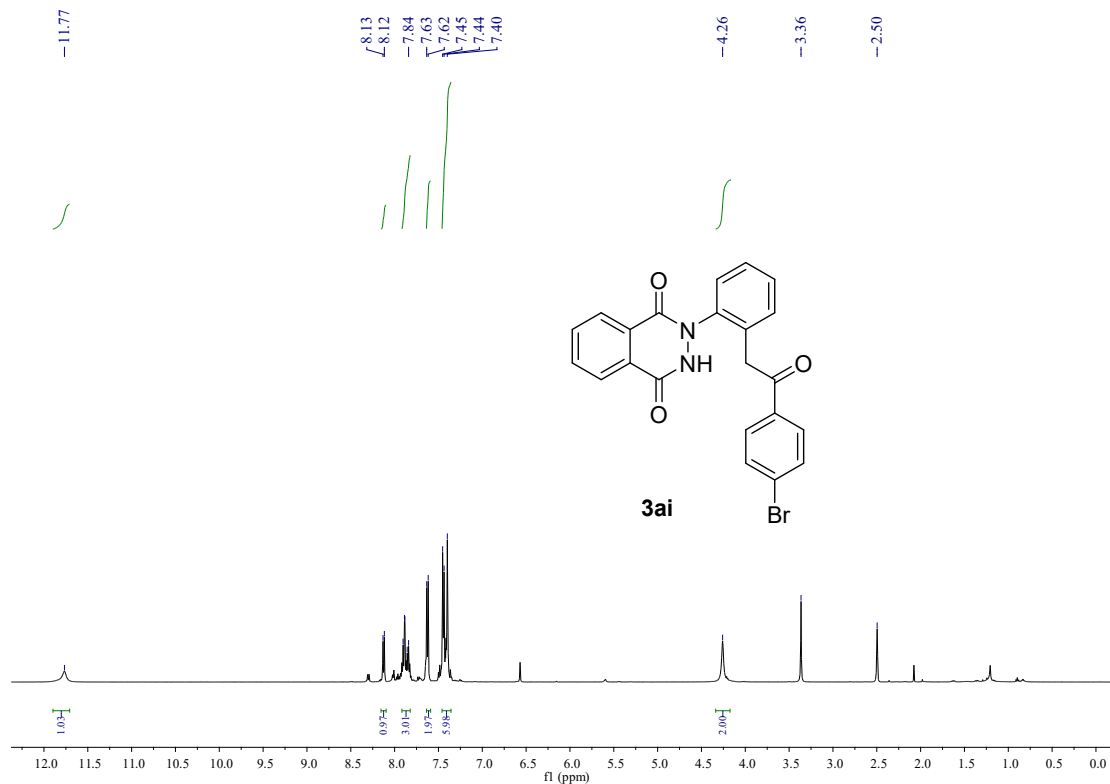

<sup>13</sup>C NMR, 125 MHz, DMSO-d<sub>6</sub>

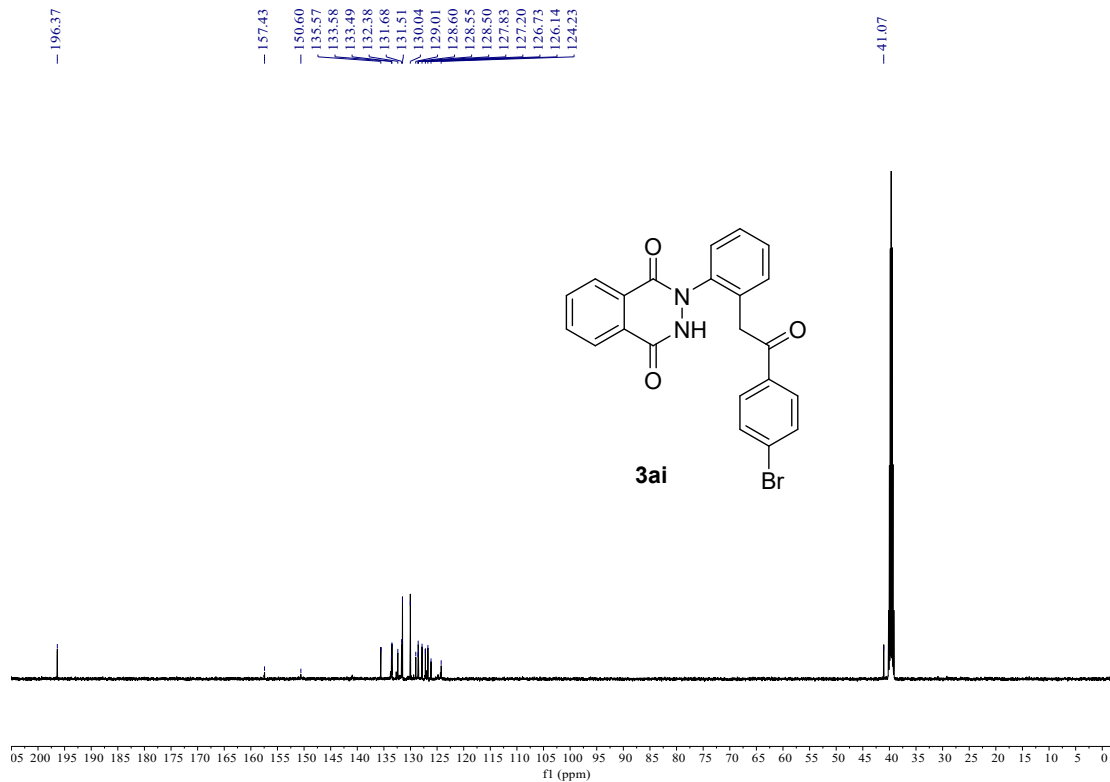

$^1\text{H}$  NMR, 500 MHz,  $\text{DMSO-}d_6$

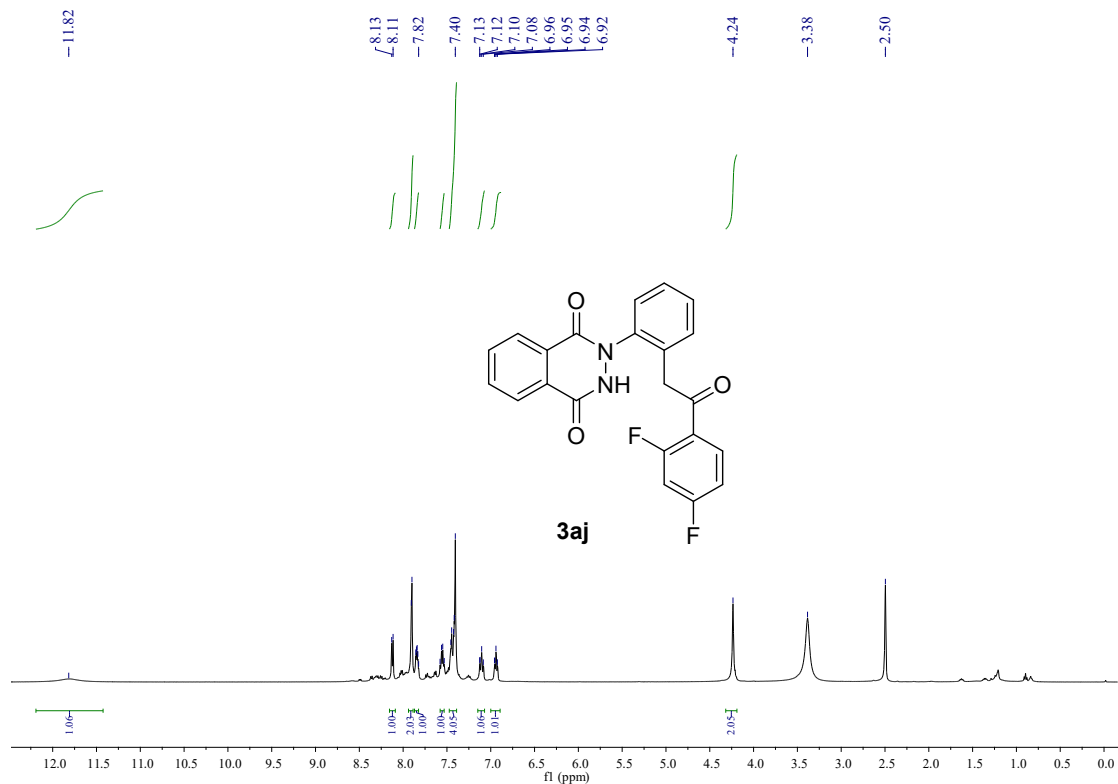

$^{13}\text{C}$  NMR, 125 MHz,  $\text{DMSO-}d_6$

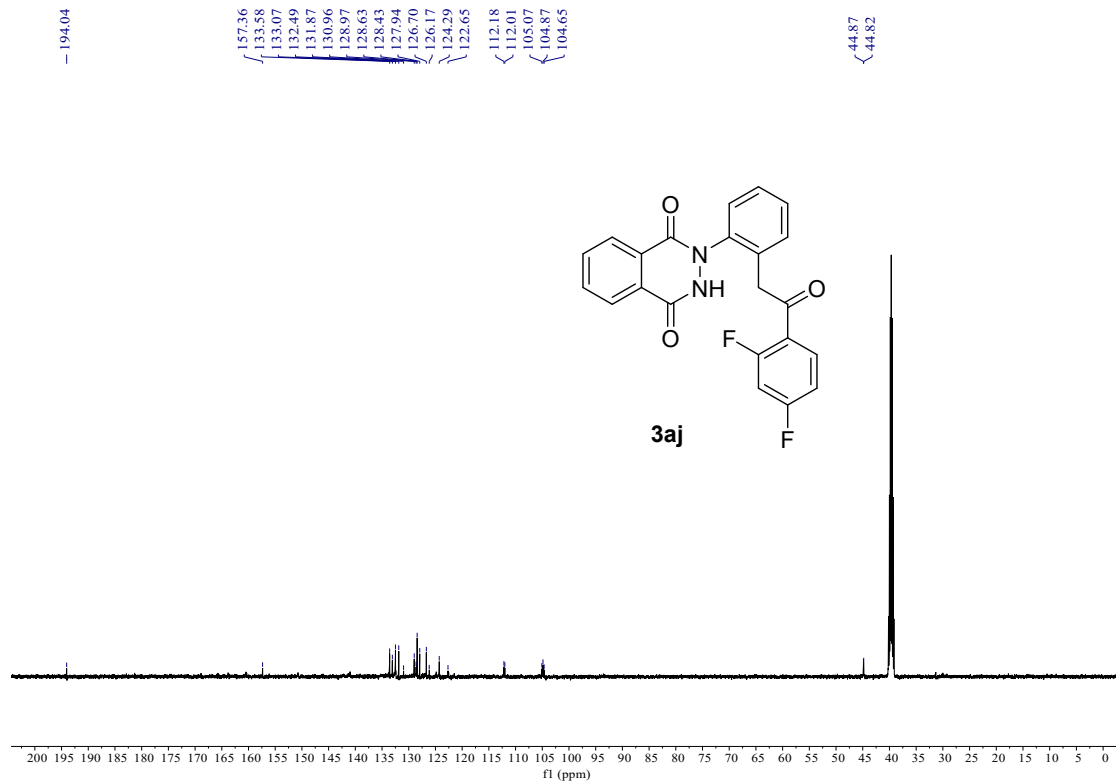

<sup>1</sup>H NMR, 500 MHz, DMSO-d<sub>6</sub>

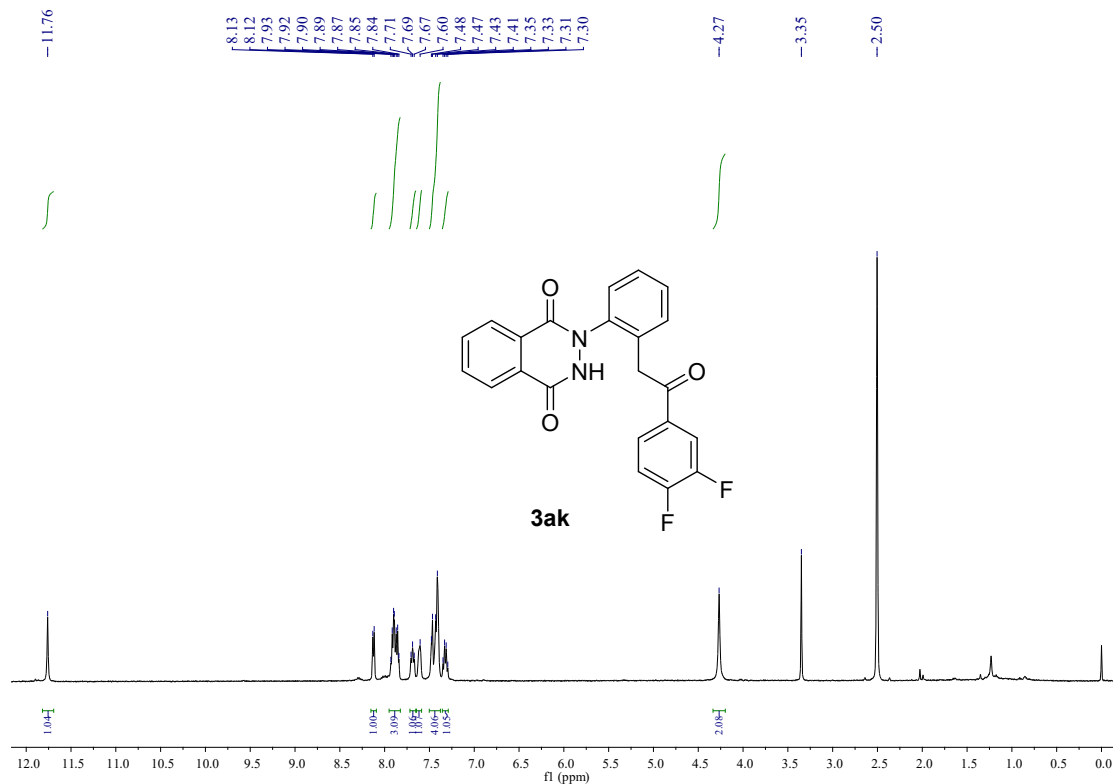

<sup>13</sup>C NMR, 125 MHz, DMSO-d<sub>6</sub>

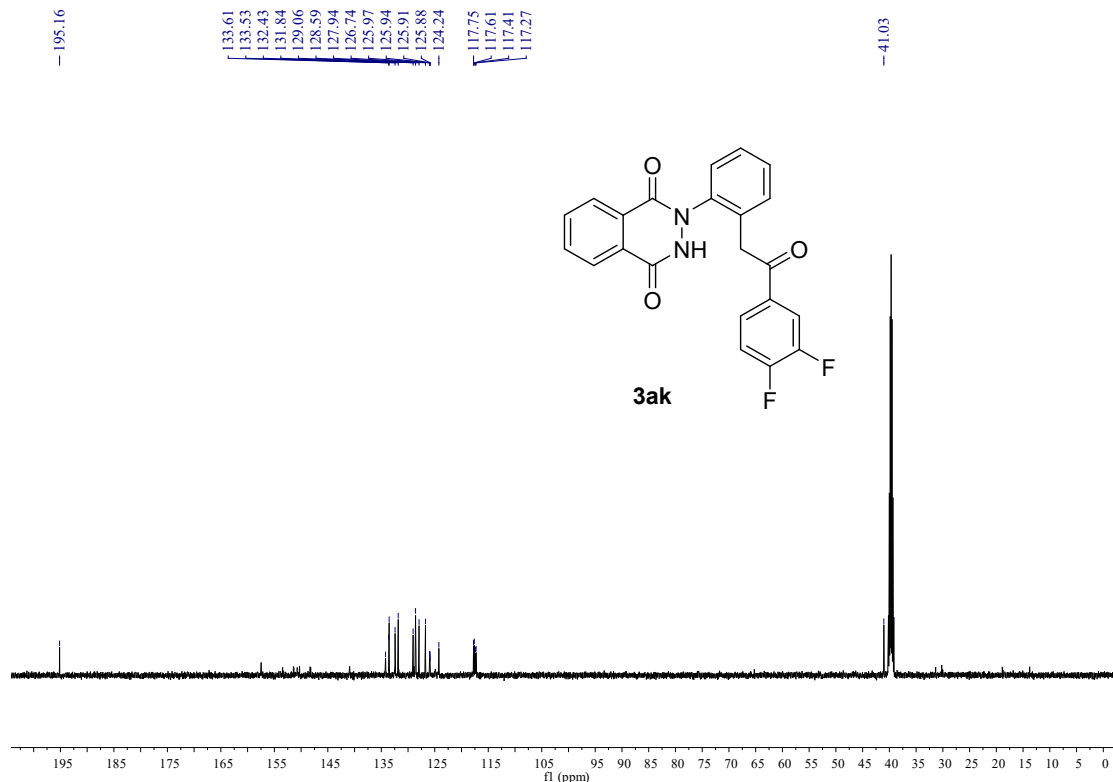

<sup>1</sup>H NMR, 500 MHz, DMSO-d<sub>6</sub>

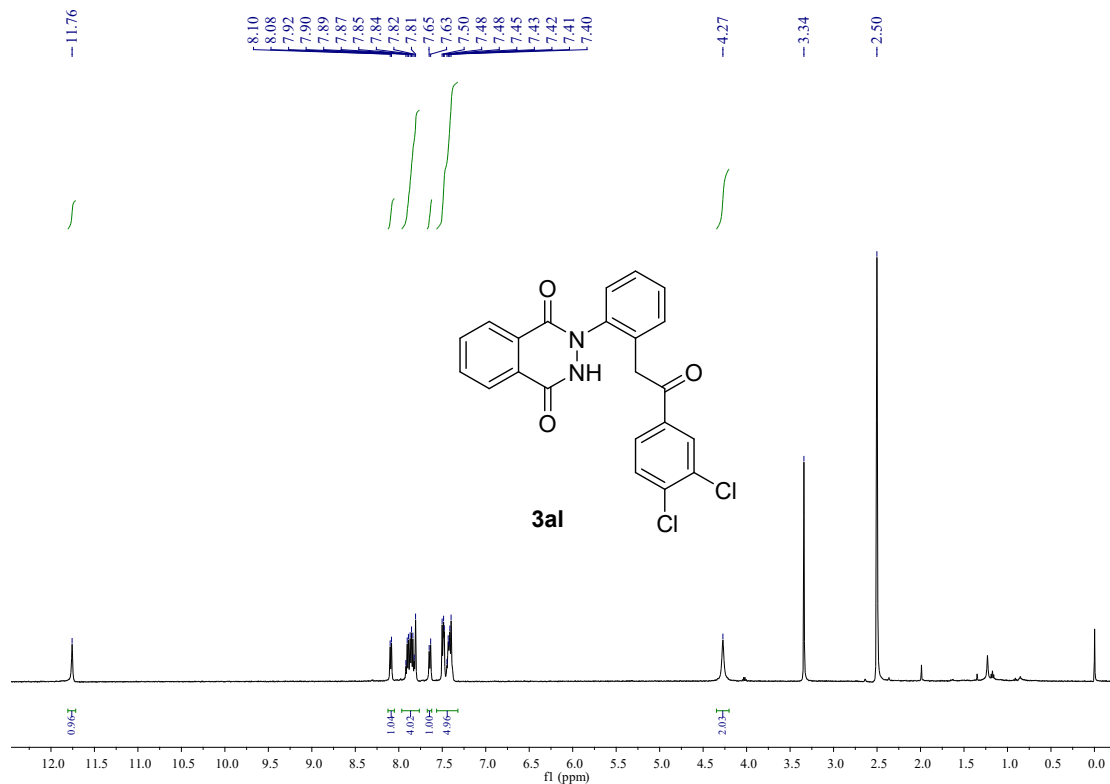

<sup>13</sup>C NMR, 125 MHz, DMSO-d<sub>6</sub>

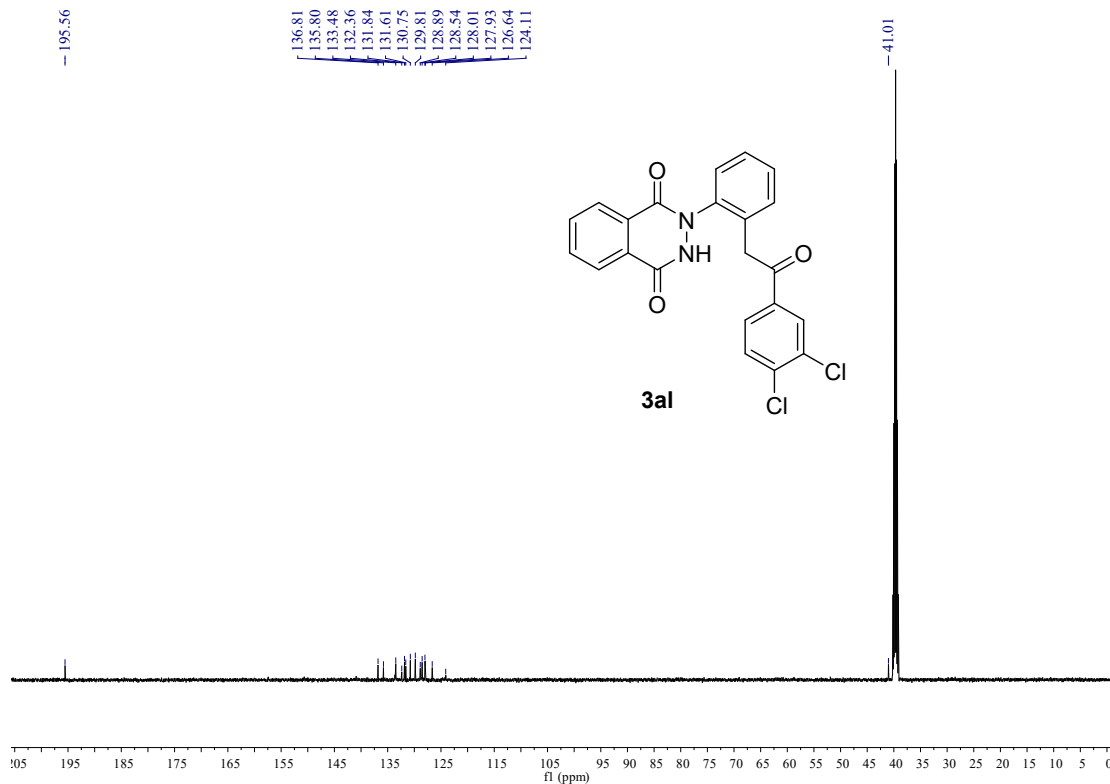



<sup>1</sup>H NMR, 500 MHz, DMSO-d<sub>6</sub>

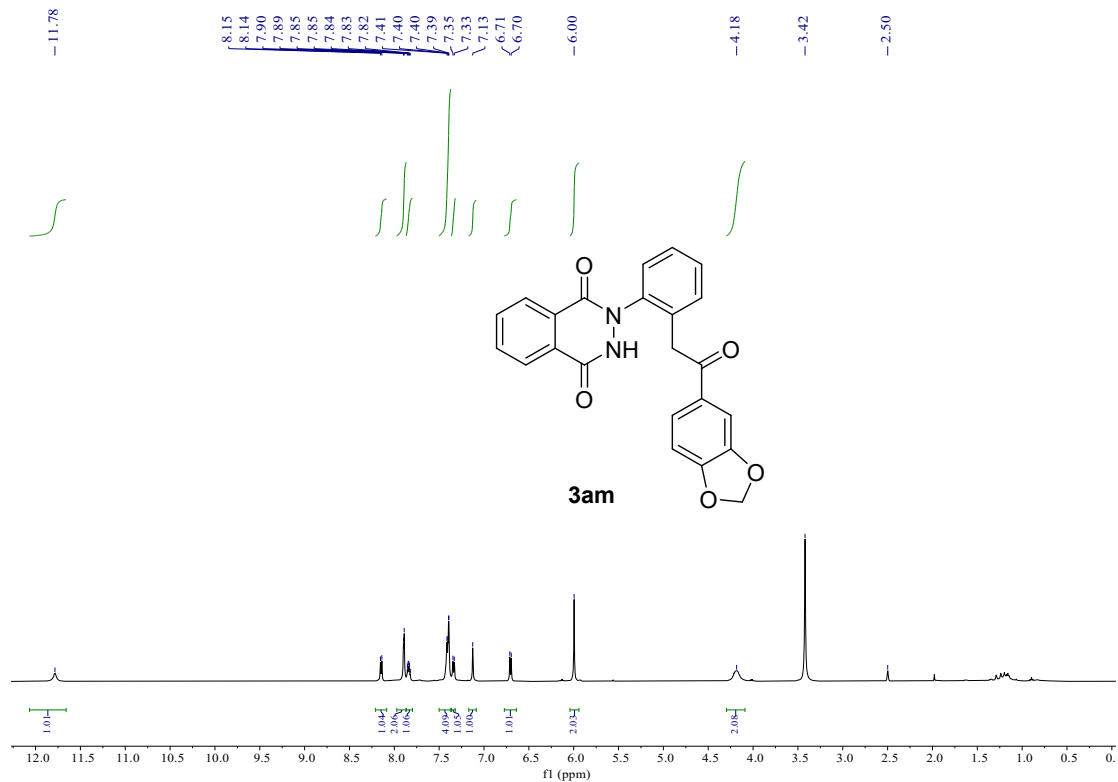

<sup>13</sup>C NMR, 125 MHz, DMSO-d<sub>6</sub>

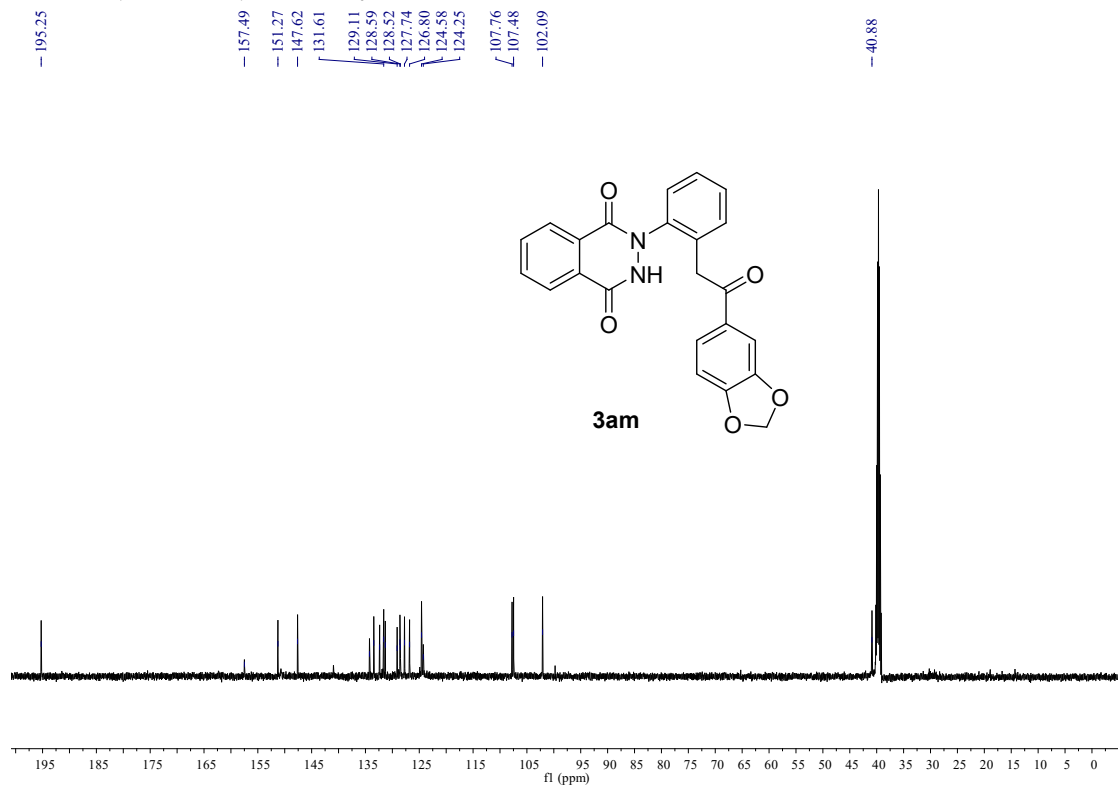

<sup>1</sup>H NMR, 500 MHz, DMSO-d<sub>6</sub>

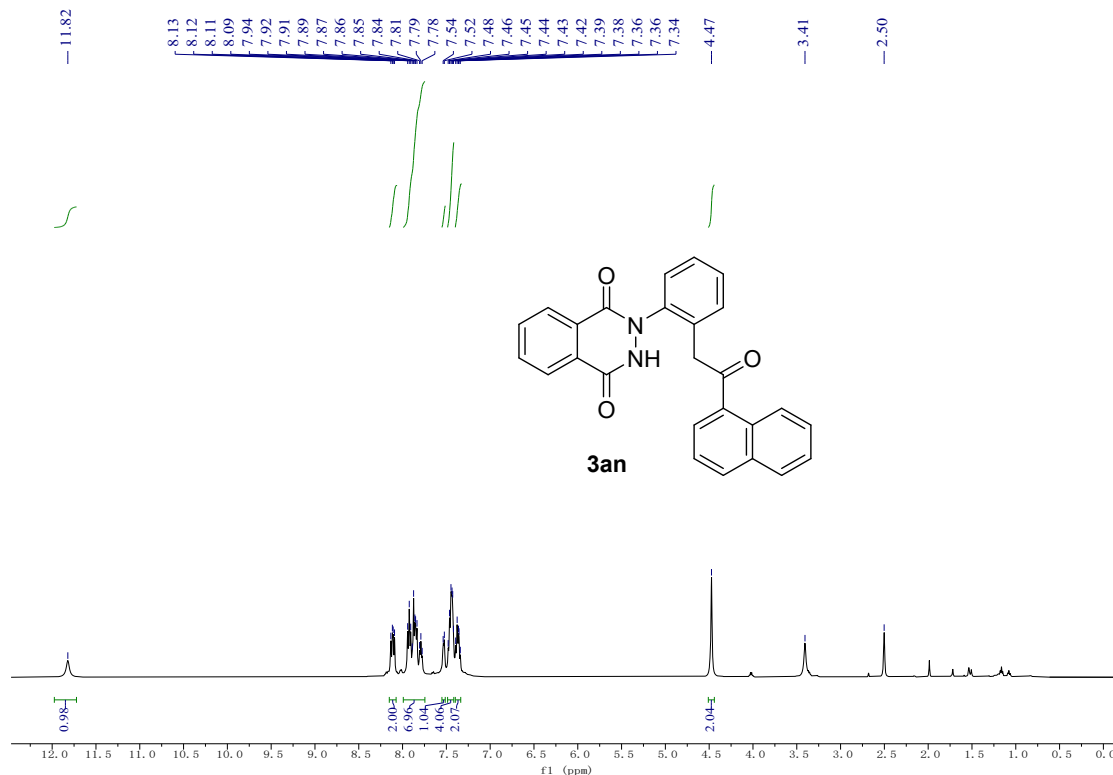

<sup>13</sup>C NMR, 125 MHz, DMSO-d<sub>6</sub>

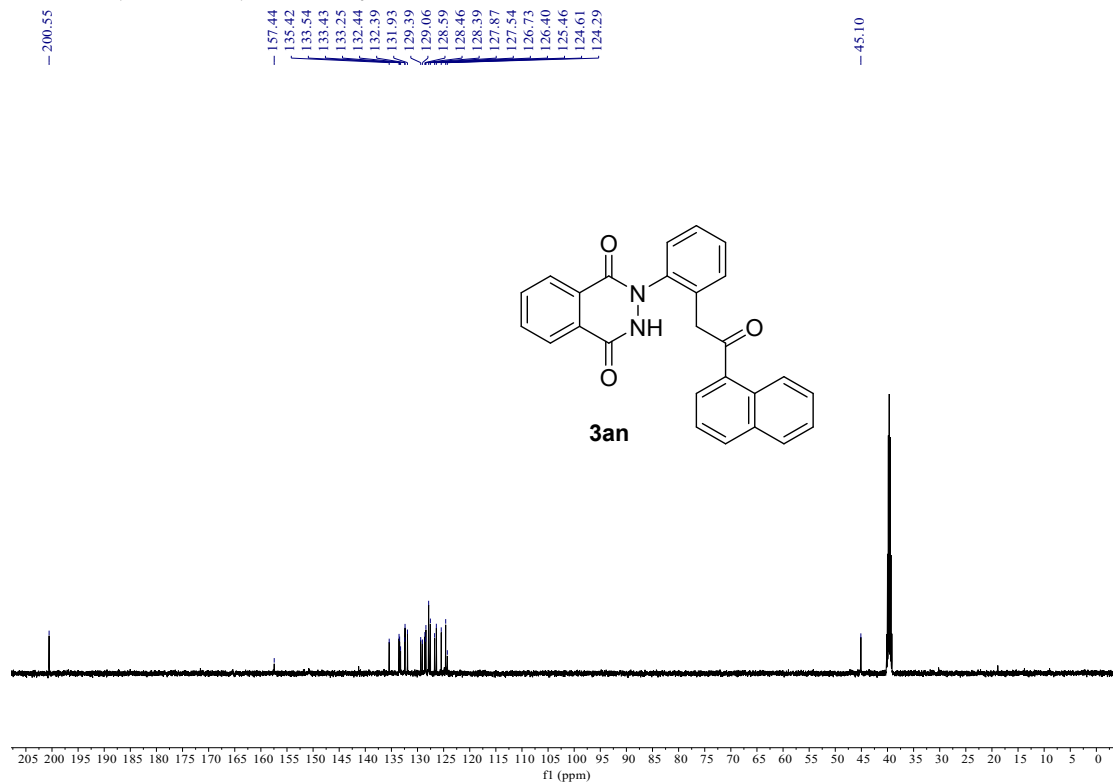

$^1\text{H}$  NMR, 500 MHz,  $\text{DMSO}-d_6$

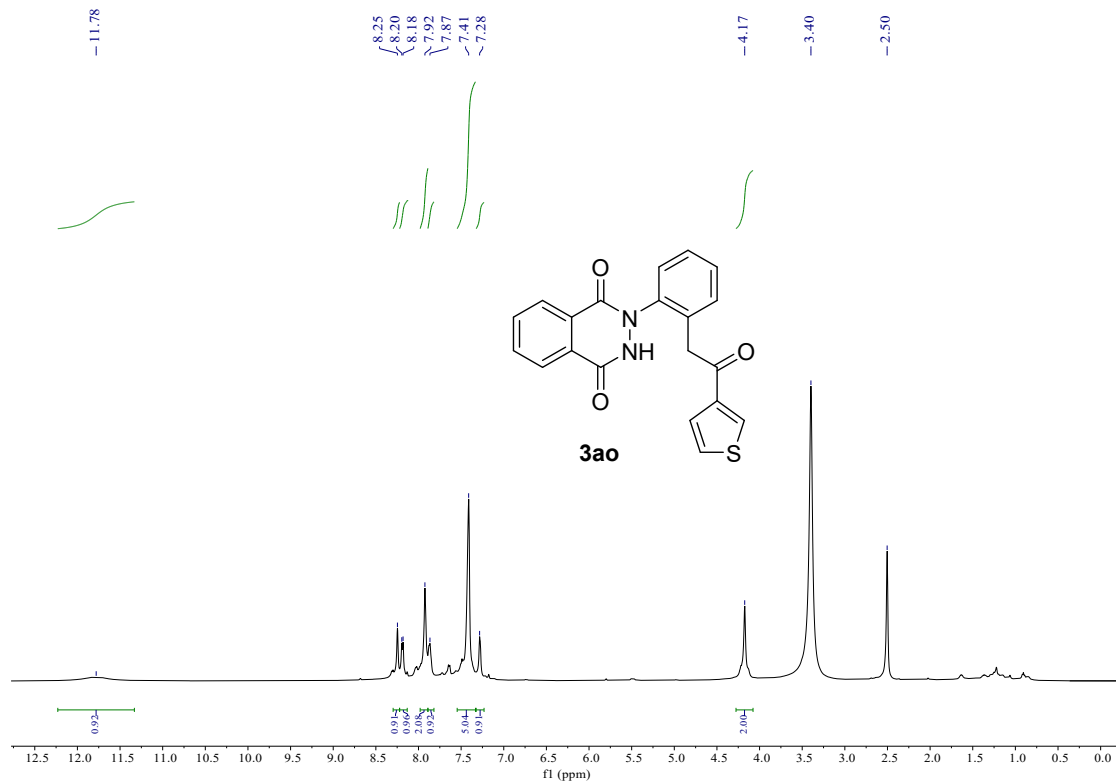

$^{13}\text{C}$  NMR, 125 MHz,  $\text{DMSO}-d_6$

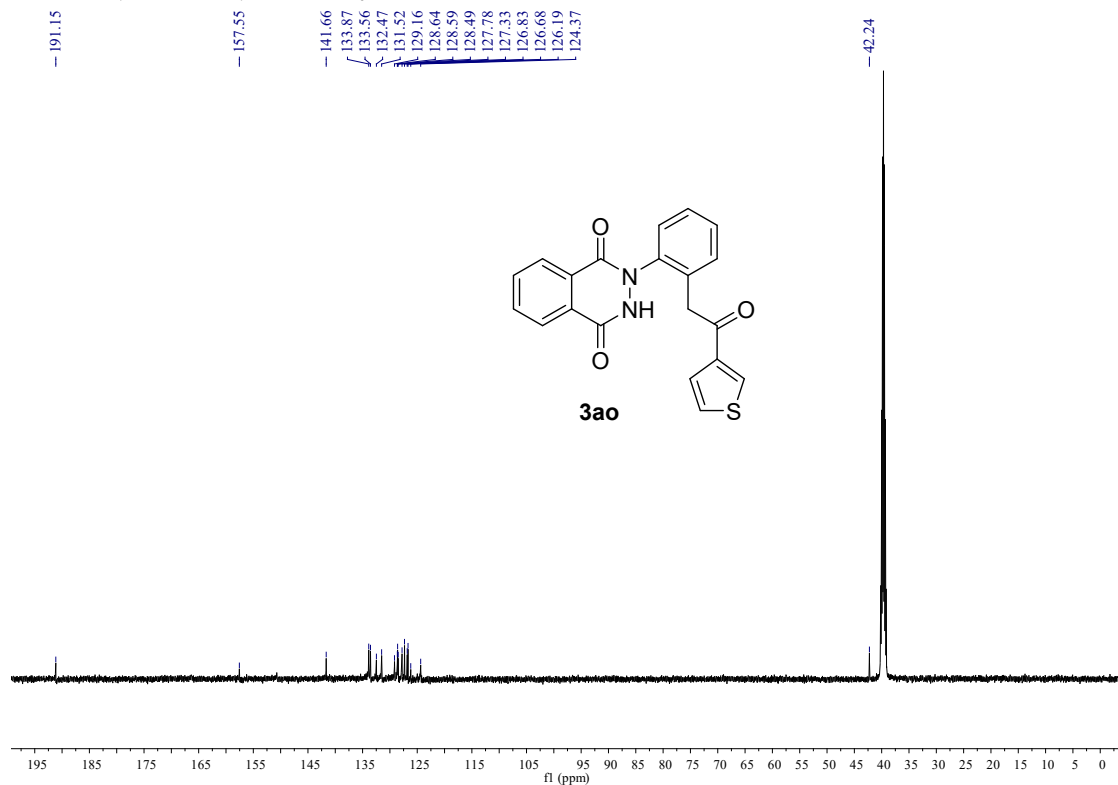

<sup>1</sup>H NMR, 500 MHz, DMSO-d<sub>6</sub>

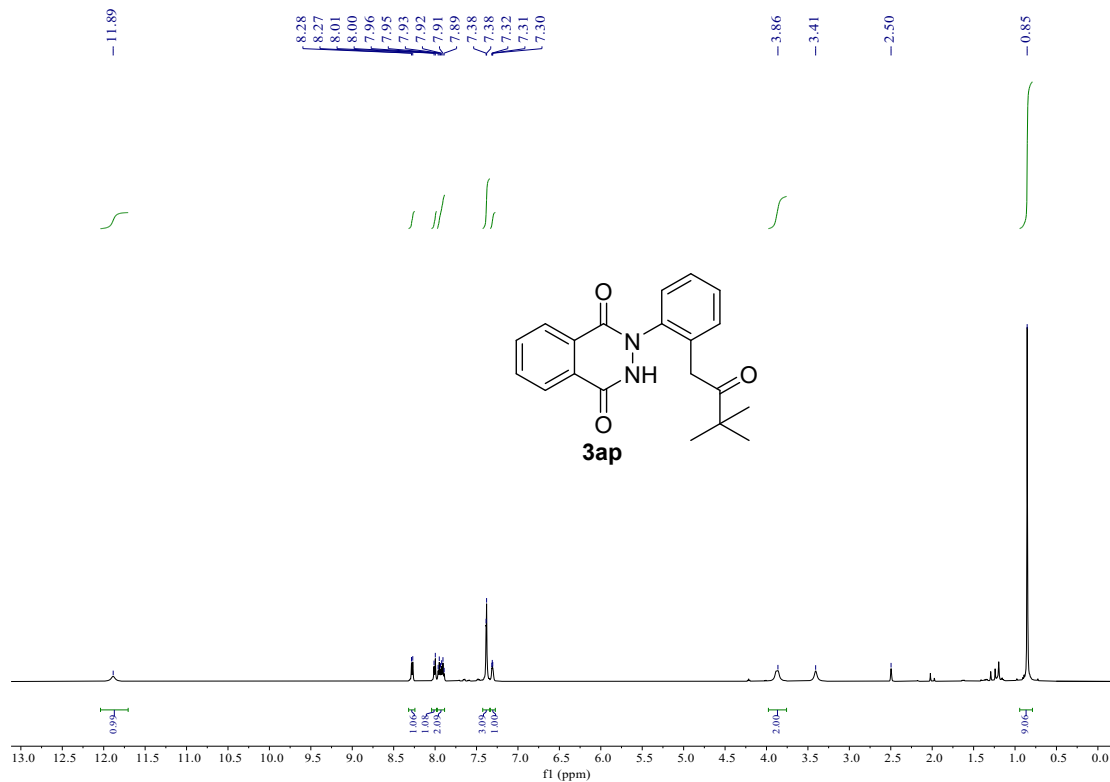

<sup>13</sup>C NMR, 125 MHz, DMSO-d<sub>6</sub>

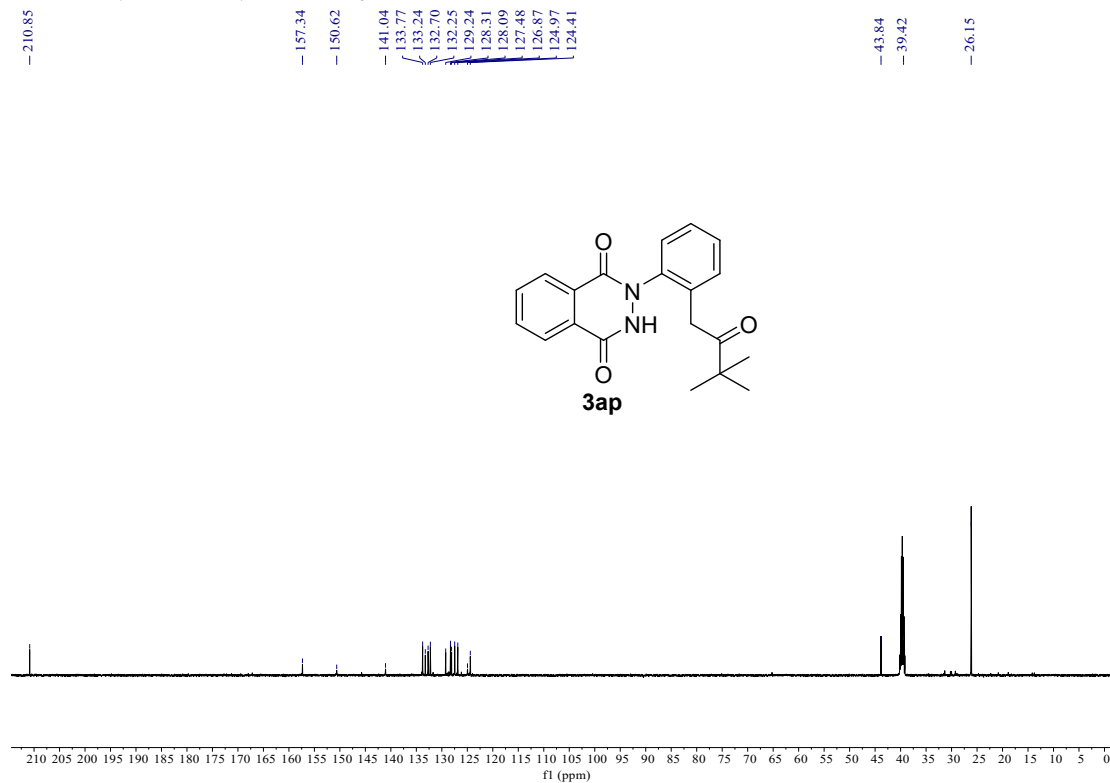

<sup>1</sup>H NMR, 500 MHz, DMSO-d<sub>6</sub>

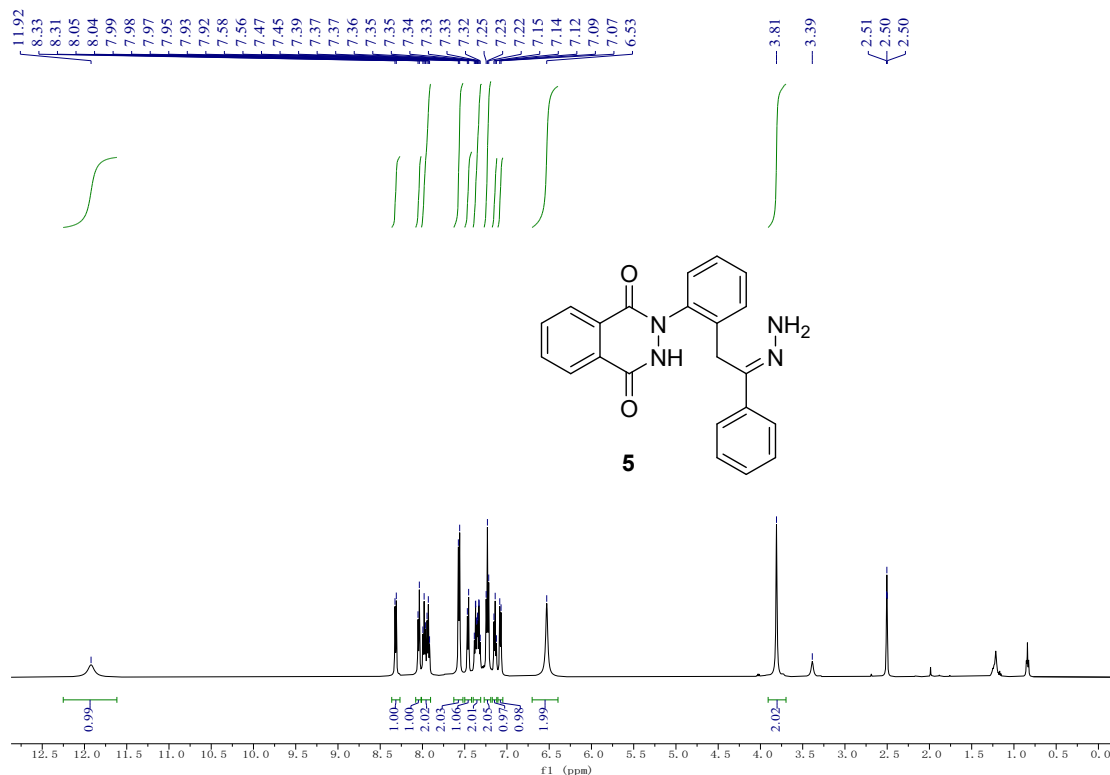

<sup>13</sup>C NMR, 125 MHz, DMSO-d<sub>6</sub>

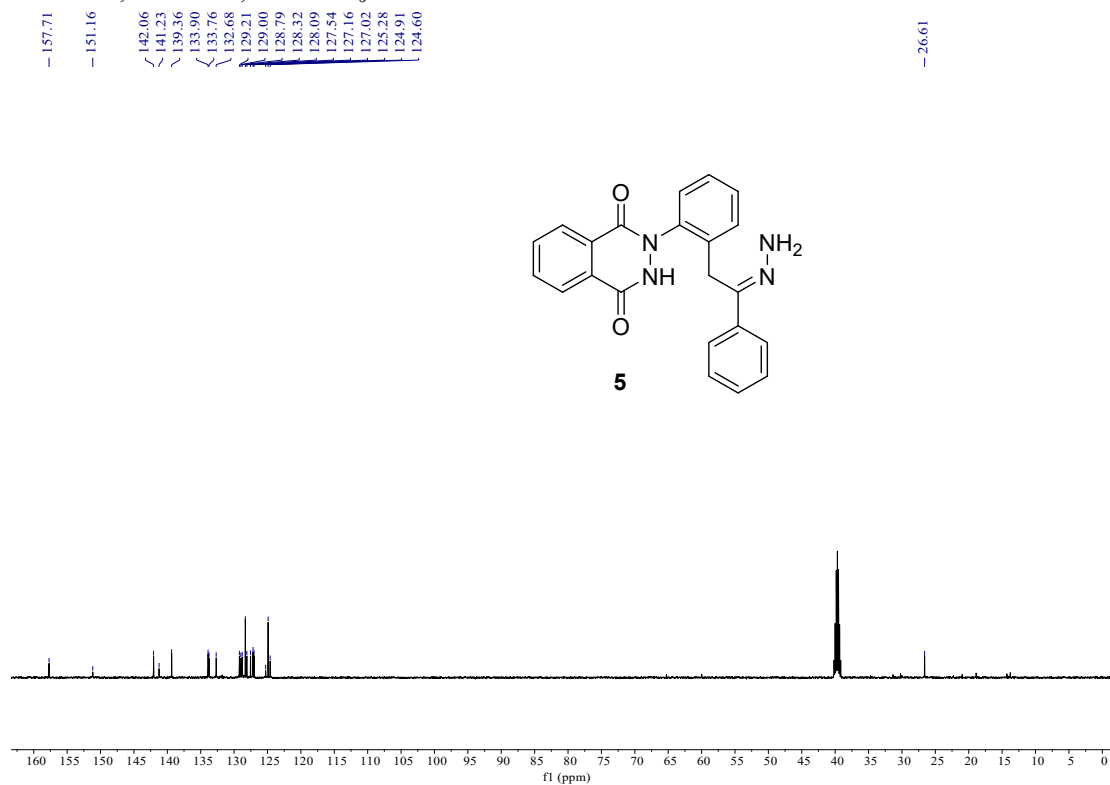

<sup>1</sup>H NMR, 500 MHz, DMSO-d<sub>6</sub>

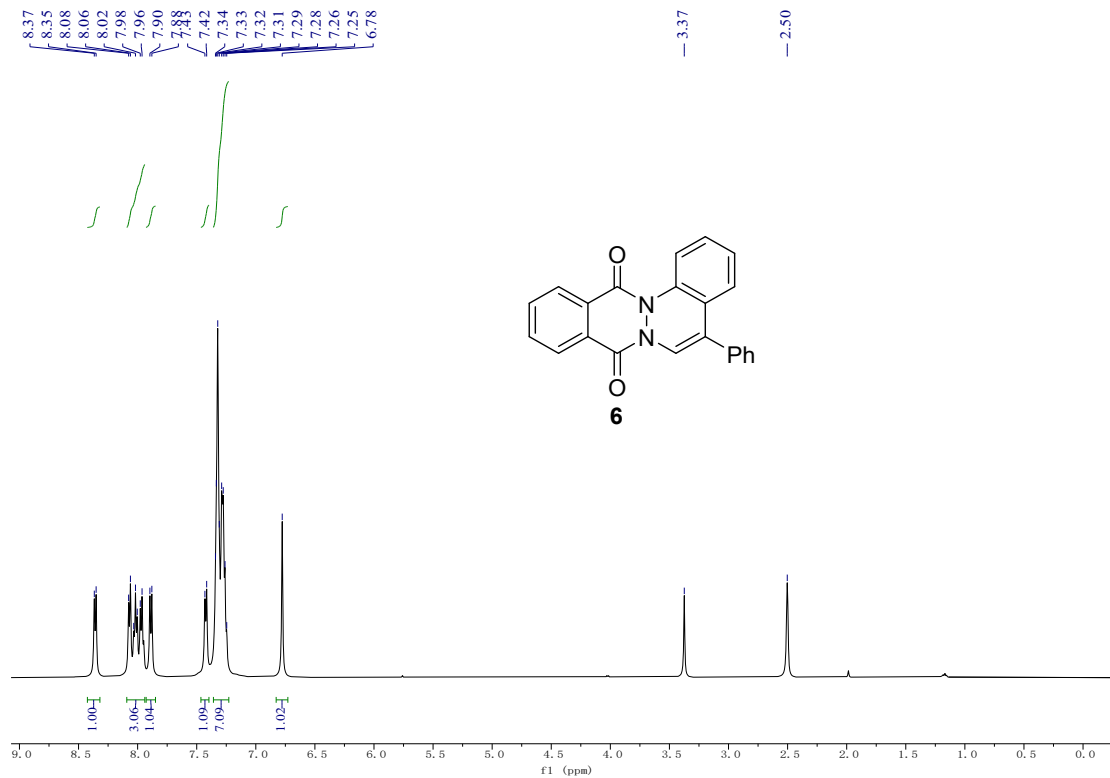

<sup>13</sup>C NMR, 125 MHz, DMSO-d<sub>6</sub>

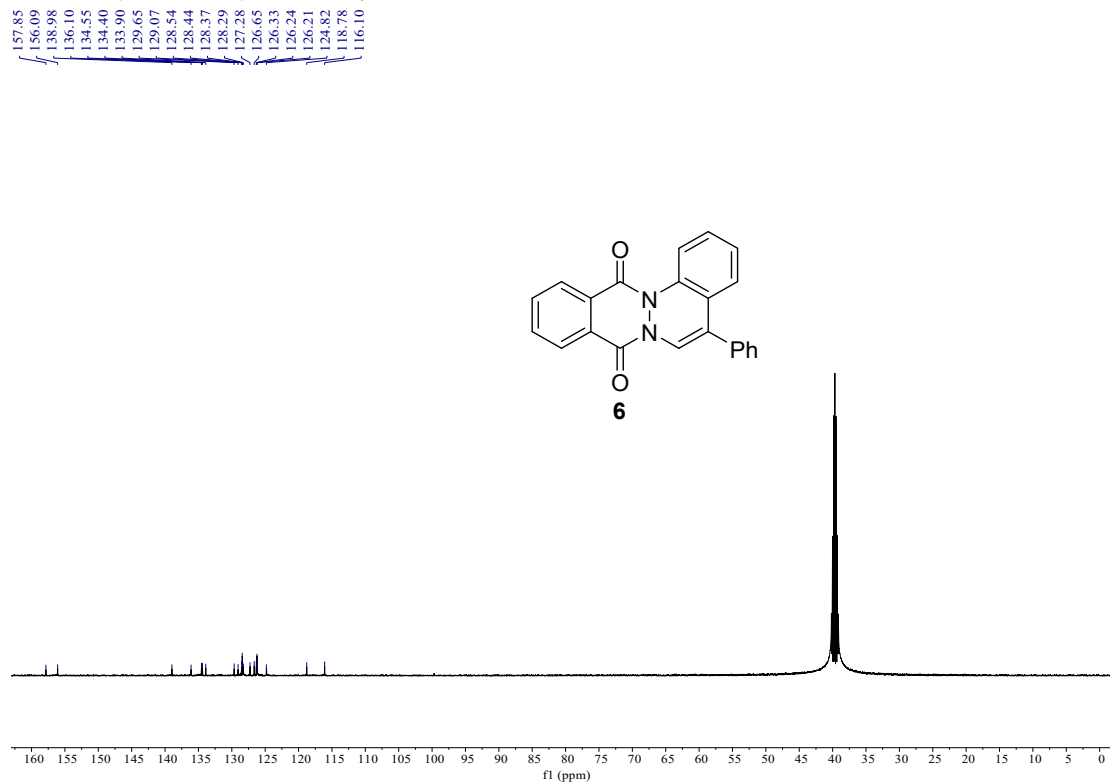

Supplement: d3ob00091e1.pdf [file d3ob00091e1.pdf]
